# Supplementary material for: KIF22 in the Prognosis and Immune Biomarking of Pan-Cancer
Source: Hindawi journal article supplement (doi:10.1155/2023/9542311), 2023-05-31
Supplement: f1 [file 9542311.f1.txt]

Abbreviations
ACC	Adrenocortical carcinoma
BLCA	Bladder Urothelial Carcinoma
BRCA	Breast invasive carcinoma
CESC	Cervical squamous cell carcinoma and endocervical adenocarcinoma
CHOL	Cholangiocarcinoma
COAD	Colon adenocarcinoma
COADREAD	Colon adenocarcinoma/Rectum adenocarcinoma Esophageal carcinoma
DLBC	Lymphoid Neoplasm Diffuse Large B-cell Lymphoma
ESCA	Esophageal carcinoma
GBM	Glioblastoma multiforme
GBMLGG	Glioma
HNSC	Head and Neck squamous cell carcinoma
KICH	Kidney Chromophobe
KIPAN	Pan-kidney cohort (KICH+KIRC+KIRP)
KIRC	Kidney renal clear cell carcinoma
KIRP	Kidney renal papillary cell carcinoma
LAML	Acute Myeloid Leukemia
LGG	Brain Lower Grade Glioma
LIHC	Liver hepatocellular carcinoma
LUAD	Lung adenocarcinoma
LUSC	Lung squamous cell carcinoma
MESO	Mesothelioma
OV	Ovarian serous cystadenocarcinoma
PAAD	Pancreatic adenocarcinoma
PCPG	Pheochromocytoma and Paraganglioma
PRAD	Prostate adenocarcinoma
READ	Rectum adenocarcinoma
SARC	Sarcoma
STAD	Stomach adenocarcinoma
SKCM	Skin Cutaneous Melanoma
STES	Stomach and Esophageal carcinoma
TGCT	Testicular Germ Cell Tumors
THCA	Thyroid carcinoma
THYM	Thymoma
UCEC	Uterine Corpus Endometrial Carcinoma
UCS	Uterine Carcinosarcoma
UVM	Uveal Melanoma
ALL-R	Recurrent Acute Lymphoblastic Leukemia
SKCM-M	Metastatic Skin Cutaneous Melanoma
SKCM-P	Primary Skin Cutaneous Melanoma
SCC	Squamous Cell Carcinoma
NSCLC	Non-small Cell Lung Cancer
NPC	Nasopharyngeal carcinoma
NHL	Non-Hodgkin Lymphoma
CRC	Colorectal cancer
KIFs	Kinesin superfamily proteins
ESTIMATE	Estimation of STromal and Immune cells in MAlignant Tumours using Expression data
TME	Tumor microenvironment
KIF22	Kinesin family member 22
MDSCs	Myeloid-derived suppressor cells
CAFs	Cancer-associated ?broblasts
Tregs	Regulatory T cells
TIDE	Tumor Immune Dysfunction and Exclusion
EPIC	Estimating the Proportions of Immune and Cancer cells
MCP-counter	Microenvironment Cell Populations-counter
CIBERSORT	Cell-type identification by estimating relative subsets of RNA transcripts
OS	Overall survival
DFI	Disease free interval
DSS	Disease speci?c survival
PFI	Progression free interval
DFS	Disease Free Survival
PFS	Progression free Survival
mRNAsi	mRNA expression-based stemness index
EREG-mRNAsi	Epigenetically regulated-mRNA expression-based stemness index
mDNAsi	DNA methylation-based stemness index
DMPsi	Differentially methylated probes-based stemness index
ENHsi	Enhancer elements/DNA methylation-based stemness index
EREG-METHsi	Epigenetically regulated DNA methylation-based stemness index
HRD	Homologous recombination deficiency
LOH	Loss of heterozygosity
TMB	Tumor mutational burden
MSI	Microsatellite instability
MATH	Mutant allele tumor heterogeneity
FUCCI	Fluorescent Ubiquitination-based Cell Cycle Indicator
ICB	Immune checkpoint blockade
AUC	Area under the?receiver operating characteristic curve
GO	Gene Ontology
KEGG	Kyoto Encyclopedia of Genes and Genomes
CNV	Copy number variation
GSEA	Gene Set Enrichment Analysis
MHC	Major histocompatibility complex
