# Supplementary material for: KIF22 in the Prognosis and Immune Biomarking of Pan-Cancer
Source: Hindawi journal article supplement (doi:10.1155/2023/9542311), 2023-05-31
Supplement: f6 [file 9542311.f6.txt]

TYPE	ID_NAME	ID_DESCRIPTION	DATA_POSTPROCESSING	DATASET	CANCER TYPE	SUBTYPE	ENDPOINT	COHORT	CONTRIBUTOR	ARRAY TYPE	PROBE ID	N	CUTPOINT	MINIMUM P-VALUE	CORRECTED P-VALUE	ln(HR-high / HR-low)	COX P-VALUE	ln(HR)	HR [95% CI-low CI-upp]
GENE	KIF22	kinesin family member 22	None	GSE5287	Bladder cancer		Overall Survival	Aarhus (1995-2004)	Als	HG-U133A	216969_s_at	30	0.666667	1.04E-05	0.000461354	2.04767	0.0137775	1.4091	4.09 [1.33 - 12.56]
GENE	KIF22	kinesin family member 22	None	GSE5287	Bladder cancer		Overall Survival	Aarhus (1995-2004)	Als	HG-U133A	202183_s_at	30	0.866667	0.0929075	-	0.914931	0.318378	0.625602	1.87 [0.55 - 6.39]
GENE	KIF22	kinesin family member 22	None	GSE13507	Bladder cancer		Overall Survival	CNUH	Kim	Human-6 v2	ILMN_1814589	165	0.321212	0.00300086	0.0630049	0.888151	0.0239446	0.349306	1.42 [1.05 - 1.92]
GENE	KIF22	kinesin family member 22	None	GSE13507	Bladder cancer	Transitional cell carcinoma	Disease Specific Survival	CNUH	Kim	Human-6 v2	ILMN_1814589	165	0.715151	0.000344644	0.0102977	1.19944	0.0015273	0.644967	1.91 [1.28 - 2.84]
GENE	KIF22	kinesin family member 22	None	GSE12417-GPL96	Blood cancer	AML	Overall Survival	AMLCG (1999-2003)	Metzeler	HG-U133A	202183_s_at	163	0.104294	0.00821533	0.139103	-0.726136	0.102892	-0.454737	0.63 [0.37 - 1.10]
GENE	KIF22	kinesin family member 22	None	GSE12417-GPL96	Blood cancer	AML	Overall Survival	AMLCG (1999-2003)	Metzeler	HG-U133A	216969_s_at	163	0.294479	0.0265264	0.325988	-0.455831	0.246785	-0.428703	0.65 [0.32 - 1.35]
GENE	KIF22	kinesin family member 22	None	GSE12417-GPL570	Blood cancer	AML	Overall Survival	AMLCG (2004)	Metzeler	HG-U133_Plus_2	202183_s_at	79	0.734177	0.00837518	0.141163	0.796987	0.354097	0.286591	1.33 [0.73 - 2.44]
GENE	KIF22	kinesin family member 22	None	GSE12417-GPL570	Blood cancer	AML	Overall Survival	AMLCG (2004)	Metzeler	HG-U133_Plus_2	216969_s_at	79	0.101266	0.00701086	0.123166	-1.01188	0.633879	-0.243431	0.78 [0.29 - 2.13]
GENE	KIF22	kinesin family member 22	None	GSE5122	Blood cancer	AML	Overall Survival	San Diego	Raponi	HG-U133A	202183_s_at	58	0.224138	0.0757779	-	-0.563809	0.337377	-0.28942	0.75 [0.41 - 1.35]
GENE	KIF22	kinesin family member 22	None	GSE5122	Blood cancer	AML	Overall Survival	San Diego	Raponi	HG-U133A	216969_s_at	58	0.5	0.00467983	0.0898327	0.801643	0.0682755	0.250974	1.29 [0.98 - 1.68]
GENE	KIF22	kinesin family member 22	None	GSE8970	Blood cancer	AML	Overall Survival	San Diego	Raponi	HG-U133A	202183_s_at	34	0.794118	0.162195	-	-0.68026	0.803053	0.0631309	1.07 [0.65 - 1.75]
GENE	KIF22	kinesin family member 22	None	GSE8970	Blood cancer	AML	Overall Survival	San Diego	Raponi	HG-U133A	216969_s_at	34	0.764706	0.0401467	0.42868	-1.07042	0.881534	-0.0324122	0.97 [0.63 - 1.48]
GENE	KIF22	kinesin family member 22	None	GSE4475	Blood cancer	B-cell lymphoma	Overall Survival	Berlin (2003-2005)	Hummel	HG-U133A	216969_s_at	158	0.898734	0.048292	0.481274	-0.979396	0.189915	-0.36121	0.70 [0.41 - 1.20]
GENE	KIF22	kinesin family member 22	None	GSE4475	Blood cancer	B-cell lymphoma	Overall Survival	Berlin (2003-2005)	Hummel	HG-U133A	202183_s_at	158	0.810127	0.00911654	0.150565	-0.910743	0.120251	-0.439092	0.64 [0.37 - 1.12]
GENE	KIF22	kinesin family member 22	None	E-TABM-346	Blood cancer	DLBCL	Event Free Survival	GELA (1998-2000)	Jais	HG-U133A	216969_s_at	53	0.150943	0.00947903	0.155074	2.18234	0.0172414	1.07487	2.93 [1.21 - 7.10]
GENE	KIF22	kinesin family member 22	None	E-TABM-346	Blood cancer	DLBCL	Overall Survival	GELA (1998-2000)	Jais	HG-U133A	202183_s_at	53	0.716981	0.262252	-	0.432049	0.70873	-0.227455	0.80 [0.24 - 2.63]
GENE	KIF22	kinesin family member 22	None	E-TABM-346	Blood cancer	DLBCL	Overall Survival	GELA (1998-2000)	Jais	HG-U133A	216969_s_at	53	0.150943	0.0267565	0.327911	1.93905	0.0261435	1.08422	2.96 [1.14 - 7.69]
GENE	KIF22	kinesin family member 22	None	E-TABM-346	Blood cancer	DLBCL	Event Free Survival	GELA (1998-2000)	Jais	HG-U133A	202183_s_at	53	0.698113	0.296378	-	0.373093	0.968611	-0.0221104	0.98 [0.33 - 2.94]
GENE	KIF22	kinesin family member 22	None	GSE16131-GPL96	Blood cancer	Follicular lymphoma	Overall Survival	NCI (1974-2001)	Dave	HG-U133A	216969_s_at	180	0.894444	0.0831209	-	-0.717055	0.929992	0.0190398	1.02 [0.67 - 1.56]
GENE	KIF22	kinesin family member 22	None	GSE16131-GPL96	Blood cancer	Follicular lymphoma	Overall Survival	NCI (1974-2001)	Dave	HG-U133A	202183_s_at	180	0.666667	0.168085	-	0.304667	0.51837	0.19262	1.21 [0.68 - 2.18]
GENE	KIF22	kinesin family member 22	None	GSE2658	Blood cancer	Multiple myeloma	Disease Specific Survival	Arkansas	Zhan	HG-U133_Plus_2	202183_s_at	559	0.797853	0.000319197	0.00963879	0.786457	0.0491121	0.402833	1.50 [1.00 - 2.23]
GENE	KIF22	kinesin family member 22	None	GSE2658	Blood cancer	Multiple myeloma	Disease Specific Survival	Arkansas	Zhan	HG-U133_Plus_2	216969_s_at	559	0.579606	0.0479204	0.478994	-0.430677	0.402738	-0.228706	0.80 [0.47 - 1.36]
GENE	KIF22	kinesin family member 22	None	GSE4271-GPL96	Brain cancer	Astrocytoma	Overall Survival	MDA	Phillips	HG-U133A	202183_s_at	77	0.831169	3.59E-06	0.000176007	1.44155	0.00172894	1.31627	3.73 [1.64 - 8.50]
GENE	KIF22	kinesin family member 22	None	GSE4271-GPL96	Brain cancer	Astrocytoma	Overall Survival	MDA	Phillips	HG-U133A	216969_s_at	77	0.766234	0.0685602	-	0.524037	0.55255	0.148864	1.16 [0.71 - 1.90]
GENE	KIF22	kinesin family member 22	None	GSE7696	Brain cancer	Glioblastoma	Overall Survival	Lausanne	Murat	HG-U133_Plus_2	202183_s_at	70	0.114286	0.00283211	0.0601279	-1.13773	0.308402	-0.388685	0.68 [0.32 - 1.43]
GENE	KIF22	kinesin family member 22	None	GSE7696	Brain cancer	Glioblastoma	Overall Survival	Lausanne	Murat	HG-U133_Plus_2	216969_s_at	70	0.214286	0.0691346	-	0.651178	0.574241	0.420358	1.52 [0.35 - 6.60]
GENE	KIF22	kinesin family member 22	None	MGH-glioma	Brain cancer	Glioma	Overall Survival	CBTTB, MGH, BWH, CH	Nutt	HG-U95A	356_at	50	0.18	0.204659	-	0.620246	0.53415	0.149882	1.16 [0.72 - 1.86]
GENE	KIF22	kinesin family member 22	None	GSE4412-GPL96	Brain cancer	Glioma	Overall Survival	UCLA (1996-2003)	Freije	HG-U133A	216969_s_at	74	0.202703	0.0260707	0.322154	-0.716251	0.741279	-0.112221	0.89 [0.46 - 1.74]
GENE	KIF22	kinesin family member 22	None	GSE4412-GPL96	Brain cancer	Glioma	Overall Survival	UCLA (1996-2003)	Freije	HG-U133A	202183_s_at	74	0.891892	3.17E-05	0.00126328	1.5642	0.00762508	1.57564	4.83 [1.52 - 15.38]
GENE	KIF22	kinesin family member 22	None	GSE16581	Brain cancer	Meningioma	Overall Survival	UCLA	Lee	HG-U133_Plus_2	216969_s_at	67	0.880597	0.0243892	0.307743	1.48991	0.15237	2.11277	8.27 [0.46 - 149.33]
GENE	KIF22	kinesin family member 22	None	GSE16581	Brain cancer	Meningioma	Overall Survival	UCLA	Lee	HG-U133_Plus_2	202183_s_at	67	0.104478	0.0847149	-	-1.18546	0.856846	-0.222651	0.80 [0.07 - 8.99]
GENE	KIF22	kinesin family member 22	None	GSE19615	Breast cancer		Distant Metastasis Free Survival	DF/HCC	Li	HG-U133_Plus_2	202183_s_at	115	0.226087	0.0565342	-	-0.985168	0.969913	-0.0351376	0.97 [0.16 - 5.99]
GENE	KIF22	kinesin family member 22	None	GSE19615	Breast cancer		Distant Metastasis Free Survival	DF/HCC	Li	HG-U133_Plus_2	216969_s_at	115	0.165217	0.0841638	-	15.3107	0.179757	0.663696	1.94 [0.74 - 5.12]
GENE	KIF22	kinesin family member 22	None	GSE3143	Breast cancer		Overall Survival	Duke	Bild	HG-U95A	356_at	158	0.810127	0.0186381	0.25488	0.70361	0.136131	0.290747	1.34 [0.91 - 1.96]
GENE	KIF22	kinesin family member 22	None	GSE7849	Breast cancer		Disease Free Survival	Duke (1990-2001)	Anders	HG-U95A	356_at	76	0.223684	0.101731	-	1.53926	0.734993	0.111513	1.12 [0.59 - 2.13]
GENE	KIF22	kinesin family member 22	None	GSE12276	Breast cancer		Relapse Free Survival	EMC	Bos	HG-U133_Plus_2	216969_s_at	204	0.563725	0.0214341	0.28132	0.328786	0.140571	0.145031	1.16 [0.95 - 1.40]
GENE	KIF22	kinesin family member 22	None	GSE12276	Breast cancer		Relapse Free Survival	EMC	Bos	HG-U133_Plus_2	202183_s_at	204	0.205882	0.00568179	0.10462	0.4908	0.0314202	0.405605	1.50 [1.04 - 2.17]
GENE	KIF22	kinesin family member 22	None	GSE6532-GPL570	Breast cancer		Distant Metastasis Free Survival	GUYT	Loi	HG-U133_Plus_2	216969_s_at	87	0.505747	0.0962056	-	-0.645314	0.619554	-0.256025	0.77 [0.28 - 2.13]
GENE	KIF22	kinesin family member 22	None	GSE6532-GPL570	Breast cancer		Distant Metastasis Free Survival	GUYT	Loi	HG-U133_Plus_2	202183_s_at	87	0.804598	0.0541226	-	0.76252	0.847969	0.0739103	1.08 [0.51 - 2.29]
GENE	KIF22	kinesin family member 22	None	GSE6532-GPL570	Breast cancer		Relapse Free Survival	GUYT	Loi	HG-U133_Plus_2	216969_s_at	87	0.505747	0.0962056	-	-0.645314	0.619554	-0.256025	0.77 [0.28 - 2.13]
GENE	KIF22	kinesin family member 22	None	GSE6532-GPL570	Breast cancer		Relapse Free Survival	GUYT	Loi	HG-U133_Plus_2	202183_s_at	87	0.804598	0.0541226	-	0.76252	0.847969	0.0739103	1.08 [0.51 - 2.29]
GENE	KIF22	kinesin family member 22	None	GSE9195	Breast cancer		Distant Metastasis Free Survival	GUYT2	Loi	HG-U133_Plus_2	216969_s_at	77	0.12987	0.198207	-	15.2476	0.329743	0.693885	2.00 [0.50 - 8.08]
GENE	KIF22	kinesin family member 22	None	GSE9195	Breast cancer		Distant Metastasis Free Survival	GUYT2	Loi	HG-U133_Plus_2	202183_s_at	77	0.779221	0.0295841	0.350961	1.28613	0.151468	1.0017	2.72 [0.69 - 10.70]
GENE	KIF22	kinesin family member 22	None	GSE9195	Breast cancer		Relapse Free Survival	GUYT2	Loi	HG-U133_Plus_2	202183_s_at	77	0.753247	0.0671132	-	0.979832	0.35097	0.567178	1.76 [0.54 - 5.81]
GENE	KIF22	kinesin family member 22	None	GSE9195	Breast cancer		Relapse Free Survival	GUYT2	Loi	HG-U133_Plus_2	216969_s_at	77	0.363636	0.085992	-	1.23985	0.300955	0.632904	1.88 [0.57 - 6.25]
GENE	KIF22	kinesin family member 22	None	GSE12093	Breast cancer		Distant Metastasis Free Survival	IO, NCI, TUM, CCF (1992-2000)	Zhang	HG-U133A	202183_s_at	136	0.897059	0.0020904	0.0469653	1.40473	0.0375036	1.39847	4.05 [1.08 - 15.12]
GENE	KIF22	kinesin family member 22	None	GSE12093	Breast cancer		Distant Metastasis Free Survival	IO, NCI, TUM, CCF (1992-2000)	Zhang	HG-U133A	216969_s_at	136	0.117647	0.0280917	0.33893	-1.08273	0.746972	-0.0973197	0.91 [0.50 - 1.64]
GENE	KIF22	kinesin family member 22	None	GSE11121	Breast cancer		Distant Metastasis Free Survival	Mainz (1988-1998)	Schmidt	HG-U133A	216969_s_at	200	0.14	0.0399048	0.427029	-0.722344	0.122463	-0.545517	0.58 [0.29 - 1.16]
GENE	KIF22	kinesin family member 22	None	GSE11121	Breast cancer		Distant Metastasis Free Survival	Mainz (1988-1998)	Schmidt	HG-U133A	202183_s_at	200	0.71	0.0237728	0.30235	0.667386	0.148482	0.674245	1.96 [0.79 - 4.90]
GENE	KIF22	kinesin family member 22	None	GSE1378	Breast cancer		Relapse Free Survival	MGH (1987-2000)	Ma	Arcturus 22k	5293	60	0.866667	0.155371	-	-1.0039	0.526264	-0.23253	0.79 [0.39 - 1.63]
GENE	KIF22	kinesin family member 22	None	GSE1379	Breast cancer		Relapse Free Survival	MGH (1987-2000)	Ma	Arcturus 22k	5293	60	0.133333	0.127516	-	-0.689058	0.288687	-0.585205	0.56 [0.19 - 1.64]
GENE	KIF22	kinesin family member 22	None	GSE2034	Breast cancer		Distant Metastasis Free Survival	Rotterdam (1980-1995)	Wang	HG-U133A	216969_s_at	286	0.531469	0.00737034	0.128002	-0.527991	0.226254	-0.155321	0.86 [0.67 - 1.10]
GENE	KIF22	kinesin family member 22	None	GSE2034	Breast cancer		Distant Metastasis Free Survival	Rotterdam (1980-1995)	Wang	HG-U133A	202183_s_at	286	0.898601	0.00635819	0.114197	0.691997	0.834453	-0.0729491	0.93 [0.47 - 1.84]
GENE	KIF22	kinesin family member 22	None	GSE1456-GPL96	Breast cancer		Relapse Free Survival	Stockholm (1994-1996)	Pawitan	HG-U133A	216969_s_at	159	0.584906	0.00605462	0.109936	0.860739	0.0565506	0.662343	1.94 [0.98 - 3.83]
GENE	KIF22	kinesin family member 22	None	GSE1456-GPL96	Breast cancer		Overall Survival	Stockholm (1994-1996)	Pawitan	HG-U133A	202183_s_at	159	0.654088	0.0117146	0.181755	0.778501	0.201743	0.759771	2.14 [0.67 - 6.86]
GENE	KIF22	kinesin family member 22	None	GSE1456-GPL96	Breast cancer		Disease Specific Survival	Stockholm (1994-1996)	Pawitan	HG-U133A	216969_s_at	159	0.63522	0.00144758	0.0346963	1.1557	0.0554573	0.789731	2.20 [0.98 - 4.94]
GENE	KIF22	kinesin family member 22	None	GSE1456-GPL96	Breast cancer		Relapse Free Survival	Stockholm (1994-1996)	Pawitan	HG-U133A	202183_s_at	159	0.396226	0.00312045	0.0650206	1.112	0.0136438	1.46019	4.31 [1.35 - 13.74]
GENE	KIF22	kinesin family member 22	None	GSE1456-GPL96	Breast cancer		Overall Survival	Stockholm (1994-1996)	Pawitan	HG-U133A	216969_s_at	159	0.584906	0.00442841	0.0859946	0.890839	0.0688673	0.620982	1.86 [0.95 - 3.63]
GENE	KIF22	kinesin family member 22	None	GSE1456-GPL96	Breast cancer		Disease Specific Survival	Stockholm (1994-1996)	Pawitan	HG-U133A	202183_s_at	159	0.654088	0.0016484	0.0386336	1.12766	0.0478419	1.3718	3.94 [1.01 - 15.34]
GENE	KIF22	kinesin family member 22	None	GSE7378	Breast cancer		Disease Free Survival	UCSF	Zhou	U133AAofAv2	202183_s_at	54	0.777778	0.000229593	0.0072468	2.40052	0.00496397	1.87879	6.55 [1.76 - 24.28]
GENE	KIF22	kinesin family member 22	None	GSE7378	Breast cancer		Disease Free Survival	UCSF	Zhou	U133AAofAv2	216969_s_at	54	0.888889	3.64E-05	0.00142998	2.37771	0.00040187	2.71972	15.18 [3.36 - 68.45]
GENE	KIF22	kinesin family member 22	None	E-TABM-158	Breast cancer		Distant Metastasis Free Survival	UCSF, CPMC (1989-1997)	Chin	HG-U133A	202183_s_at	117	0.179487	0.325832	-	-0.452817	0.809271	-0.0884088	0.92 [0.45 - 1.88]
GENE	KIF22	kinesin family member 22	None	E-TABM-158	Breast cancer		Overall Survival	UCSF, CPMC (1989-1997)	Chin	HG-U133A	202183_s_at	117	0.102564	0.0144241	0.211871	-0.988963	0.179412	-0.406078	0.67 [0.37 - 1.21]
GENE	KIF22	kinesin family member 22	None	E-TABM-158	Breast cancer		Relapse Free Survival	UCSF, CPMC (1989-1997)	Chin	HG-U133A	216969_s_at	117	0.136752	0.0182296	0.250887	-0.875322	0.2577	-0.723216	0.49 [0.14 - 1.70]
GENE	KIF22	kinesin family member 22	None	E-TABM-158	Breast cancer		Disease Specific Survival	UCSF, CPMC (1989-1997)	Chin	HG-U133A	216969_s_at	117	0.888889	0.0653164	-	-15.1842	0.248675	-0.896436	0.41 [0.09 - 1.87]
GENE	KIF22	kinesin family member 22	None	E-TABM-158	Breast cancer		Overall Survival	UCSF, CPMC (1989-1997)	Chin	HG-U133A	216969_s_at	117	0.136752	0.0182296	0.250887	-0.875322	0.2577	-0.723216	0.49 [0.14 - 1.70]
GENE	KIF22	kinesin family member 22	None	E-TABM-158	Breast cancer		Distant Metastasis Free Survival	UCSF, CPMC (1989-1997)	Chin	HG-U133A	216969_s_at	117	0.136752	0.0549222	-	-0.867069	0.374064	-0.681445	0.51 [0.11 - 2.27]
GENE	KIF22	kinesin family member 22	None	E-TABM-158	Breast cancer		Relapse Free Survival	UCSF, CPMC (1989-1997)	Chin	HG-U133A	202183_s_at	117	0.102564	0.0144241	0.211871	-0.988963	0.179412	-0.406078	0.67 [0.37 - 1.21]
GENE	KIF22	kinesin family member 22	None	E-TABM-158	Breast cancer		Disease Specific Survival	UCSF, CPMC (1989-1997)	Chin	HG-U133A	202183_s_at	117	0.239316	0.0499936	0.491585	-0.757648	0.108791	-0.580582	0.56 [0.28 - 1.14]
GENE	KIF22	kinesin family member 22	None	GSE3494-GPL96	Breast cancer		Disease Specific Survival	Uppsala (1987-1989)	Miller	HG-U133A	202183_s_at	236	0.898305	0.0297122	0.35198	0.774373	0.981838	0.0116063	1.01 [0.37 - 2.75]
GENE	KIF22	kinesin family member 22	None	GSE3494-GPL96	Breast cancer		Disease Specific Survival	Uppsala (1987-1989)	Miller	HG-U133A	216969_s_at	236	0.54661	0.0053503	0.0998124	0.755	0.353548	0.297541	1.35 [0.72 - 2.52]
GENE	KIF22	kinesin family member 22	None	GSE4922-GPL96	Breast cancer		Disease Free Survival	Uppsala (1987-1989)	Ivshina	HG-U133A	202183_s_at	249	0.84739	0.0159785	0.228226	0.614985	0.50304	0.268394	1.31 [0.60 - 2.87]
GENE	KIF22	kinesin family member 22	None	GSE4922-GPL96	Breast cancer		Disease Free Survival	Uppsala (1987-1989)	Ivshina	HG-U133A	216969_s_at	249	0.634538	0.0436069	0.45171	0.427044	0.34204	0.247672	1.28 [0.77 - 2.14]
GENE	KIF22	kinesin family member 22	None	GSE2990	Breast cancer		Relapse Free Survival	Uppsala, Oxford	Sotiriou	HG-U133A	202183_s_at	62	0.887097	0.0565688	-	0.995014	0.885603	-0.0435103	0.96 [0.53 - 1.73]
GENE	KIF22	kinesin family member 22	None	GSE2990	Breast cancer		Distant Metastasis Free Survival	Uppsala, Oxford	Sotiriou	HG-U133A	202183_s_at	125	0.432	0.236335	-	-0.445285	0.698218	0.173954	1.19 [0.49 - 2.87]
GENE	KIF22	kinesin family member 22	None	GSE2990	Breast cancer		Relapse Free Survival	Uppsala, Oxford	Sotiriou	HG-U133A	216969_s_at	62	0.145161	0.0637238	-	-0.966685	0.494204	0.369737	1.45 [0.50 - 4.18]
GENE	KIF22	kinesin family member 22	None	GSE2990	Breast cancer		Relapse Free Survival	Uppsala, Oxford	Sotiriou	HG-U133A	202183_s_at	125	0.24	0.166021	-	0.529597	0.350665	0.323297	1.38 [0.70 - 2.72]
GENE	KIF22	kinesin family member 22	None	GSE2990	Breast cancer		Distant Metastasis Free Survival	Uppsala, Oxford	Sotiriou	HG-U133A	216969_s_at	125	0.232	0.0641441	-	1.27455	0.798676	-0.123131	0.88 [0.34 - 2.28]
GENE	KIF22	kinesin family member 22	None	GSE2990	Breast cancer		Distant Metastasis Free Survival	Uppsala, Oxford	Sotiriou	HG-U133A	202183_s_at	54	0.185185	0.11908	-	15.3079	0.863765	0.0639157	1.07 [0.51 - 2.21]
GENE	KIF22	kinesin family member 22	None	GSE2990	Breast cancer		Relapse Free Survival	Uppsala, Oxford	Sotiriou	HG-U133A	216969_s_at	125	0.416	0.245494	-	-0.352968	0.761103	-0.11592	0.89 [0.42 - 1.88]
GENE	KIF22	kinesin family member 22	None	GSE2990	Breast cancer		Distant Metastasis Free Survival	Uppsala, Oxford	Sotiriou	HG-U133A	216969_s_at	54	0.333333	0.158648	-	1.0495	0.725945	0.24316	1.28 [0.33 - 4.97]
GENE	KIF22	kinesin family member 22	None	GSE7390	Breast cancer		Overall Survival	Uppsala, Oxford, Stockholm, IGR, GUYT, CRH (1980-1998)	Desmedt	HG-U133A	202183_s_at	198	0.378788	0.0872231	-	-0.454814	0.233612	-0.405176	0.67 [0.34 - 1.30]
GENE	KIF22	kinesin family member 22	None	GSE7390	Breast cancer		Distant Metastasis Free Survival	Uppsala, Oxford, Stockholm, IGR, GUYT, CRH (1980-1998)	Desmedt	HG-U133A	216969_s_at	198	0.126263	0.0146199	0.213965	1.37361	0.34986	0.151727	1.16 [0.85 - 1.60]
GENE	KIF22	kinesin family member 22	None	GSE7390	Breast cancer		Overall Survival	Uppsala, Oxford, Stockholm, IGR, GUYT, CRH (1980-1998)	Desmedt	HG-U133A	216969_s_at	198	0.126263	0.0384678	0.417108	1.16449	0.703819	0.0596729	1.06 [0.78 - 1.44]
GENE	KIF22	kinesin family member 22	None	GSE7390	Breast cancer		Relapse Free Survival	Uppsala, Oxford, Stockholm, IGR, GUYT, CRH (1980-1998)	Desmedt	HG-U133A	202183_s_at	198	0.378788	0.0097692	0.158645	-0.538425	0.110882	-0.429258	0.65 [0.38 - 1.10]
GENE	KIF22	kinesin family member 22	None	GSE7390	Breast cancer		Distant Metastasis Free Survival	Uppsala, Oxford, Stockholm, IGR, GUYT, CRH (1980-1998)	Desmedt	HG-U133A	202183_s_at	198	0.378788	0.123955	-	-0.393067	0.335495	-0.316191	0.73 [0.38 - 1.39]
GENE	KIF22	kinesin family member 22	None	GSE7390	Breast cancer		Relapse Free Survival	Uppsala, Oxford, Stockholm, IGR, GUYT, CRH (1980-1998)	Desmedt	HG-U133A	216969_s_at	198	0.116162	0.0590073	-	0.735598	0.42164	0.106829	1.11 [0.86 - 1.44]
GENE	KIF22	kinesin family member 22	None	GSE12945	Colorectal cancer		Disease Free Survival	Berlin	Staub	HG-U133A	202183_s_at	51	0.45098	0.118056	-	-1.579	0.425496	-1.10386	0.33 [0.02 - 5.01]
GENE	KIF22	kinesin family member 22	None	GSE12945	Colorectal cancer		Overall Survival	Berlin	Staub	HG-U133A	202183_s_at	62	0.354839	0.118895	-	1.14541	0.829884	0.18706	1.21 [0.22 - 6.64]
GENE	KIF22	kinesin family member 22	None	GSE12945	Colorectal cancer		Disease Free Survival	Berlin	Staub	HG-U133A	216969_s_at	51	0.372549	0.0738413	-	15.8288	0.981931	0.0422252	1.04 [0.03 - 40.31]
GENE	KIF22	kinesin family member 22	None	GSE12945	Colorectal cancer		Overall Survival	Berlin	Staub	HG-U133A	216969_s_at	62	0.516129	0.141784	-	0.872845	0.862613	0.208899	1.23 [0.12 - 13.13]
GENE	KIF22	kinesin family member 22	None	GSE17536	Colorectal cancer		Disease Specific Survival	MCC	Smith	HG-U133_Plus_2	216969_s_at	177	0.163842	0.0169639	0.238287	-0.747389	0.0430788	-0.839903	0.43 [0.19 - 0.97]
GENE	KIF22	kinesin family member 22	None	GSE17536	Colorectal cancer		Disease Specific Survival	MCC	Smith	HG-U133_Plus_2	202183_s_at	177	0.740113	0.288869	-	-0.356745	0.566935	-0.237832	0.79 [0.35 - 1.78]
GENE	KIF22	kinesin family member 22	None	GSE17536	Colorectal cancer		Overall Survival	MCC	Smith	HG-U133_Plus_2	202183_s_at	177	0.180791	0.13793	-	0.501913	0.399549	0.308211	1.36 [0.66 - 2.79]
GENE	KIF22	kinesin family member 22	None	GSE17536	Colorectal cancer		Overall Survival	MCC	Smith	HG-U133_Plus_2	216969_s_at	177	0.146893	0.161829	-	-0.440591	0.306273	-0.388473	0.68 [0.32 - 1.43]
GENE	KIF22	kinesin family member 22	None	GSE17536	Colorectal cancer		Disease Free Survival	MCC	Smith	HG-U133_Plus_2	202183_s_at	145	0.131034	0.092807	-	-0.662814	0.480062	-0.371589	0.69 [0.25 - 1.93]
GENE	KIF22	kinesin family member 22	None	GSE17536	Colorectal cancer		Disease Free Survival	MCC	Smith	HG-U133_Plus_2	216969_s_at	145	0.882759	0.133679	-	-1.40332	0.590199	-0.315122	0.73 [0.23 - 2.30]
GENE	KIF22	kinesin family member 22	None	GSE14333	Colorectal cancer		Disease Free Survival	Melbourne	Jorissen	HG-U133_Plus_2	202183_s_at	226	0.265487	0.00231169	0.0509888	-0.84618	0.0142825	-0.729517	0.48 [0.27 - 0.86]
GENE	KIF22	kinesin family member 22	None	GSE14333	Colorectal cancer		Disease Free Survival	Melbourne	Jorissen	HG-U133_Plus_2	216969_s_at	226	0.123894	0.0337914	0.383385	-0.736479	0.156154	-0.353068	0.70 [0.43 - 1.14]
GENE	KIF22	kinesin family member 22	None	GSE17537	Colorectal cancer		Overall Survival	VMC	Smith	HG-U133_Plus_2	202183_s_at	55	0.745455	0.184219	-	0.616288	0.775751	0.127963	1.14 [0.47 - 2.74]
GENE	KIF22	kinesin family member 22	None	GSE17537	Colorectal cancer		Overall Survival	VMC	Smith	HG-U133_Plus_2	216969_s_at	55	0.127273	0.0353104	0.394591	-1.04274	0.499936	-0.328596	0.72 [0.28 - 1.87]
GENE	KIF22	kinesin family member 22	None	GSE17537	Colorectal cancer		Disease Free Survival	VMC	Smith	HG-U133_Plus_2	216969_s_at	55	0.781818	0.166366	-	-0.963003	0.41393	-0.444021	0.64 [0.22 - 1.86]
GENE	KIF22	kinesin family member 22	None	GSE17537	Colorectal cancer		Disease Specific Survival	VMC	Smith	HG-U133_Plus_2	216969_s_at	49	0.571429	0.0860946	-	-1.09564	0.457512	-0.443555	0.64 [0.20 - 2.07]
GENE	KIF22	kinesin family member 22	None	GSE17537	Colorectal cancer		Disease Free Survival	VMC	Smith	HG-U133_Plus_2	202183_s_at	55	0.345455	0.0773504	-	1.03496	0.430065	0.398793	1.49 [0.55 - 4.01]
GENE	KIF22	kinesin family member 22	None	GSE17537	Colorectal cancer		Disease Specific Survival	VMC	Smith	HG-U133_Plus_2	202183_s_at	49	0.387755	0.0712272	-	1.30412	0.298741	0.664766	1.94 [0.55 - 6.81]
GENE	KIF22	kinesin family member 22	None	GSE11595	Esophagus cancer	Adenocarcinoma	Overall Survival	Sutton	Giddings	CRUKDMF_22K_v1.0.0	210713	34	0.470588	0.183954	-	0.591973	0.843487	-0.170426	0.84 [0.16 - 4.58]
GENE	KIF22	kinesin family member 22	None	GSE22138	Eye cancer	Uveal melanoma	Distant Metastasis Free Survival	BRCIC	Laurent	HG-U133_Plus_2	202183_s_at	63	0.746032	0.00589454	0.107665	0.935091	0.0795867	0.469192	1.60 [0.95 - 2.70]
GENE	KIF22	kinesin family member 22	None	GSE22138	Eye cancer	Uveal melanoma	Distant Metastasis Free Survival	BRCIC	Laurent	HG-U133_Plus_2	216969_s_at	63	0.174603	0.000561216	0.0156375	-1.25424	0.367136	1.19458	3.30 [0.25 - 44.29]
GENE	KIF22	kinesin family member 22	None	GSE2837	Head and neck cancer	Squamous cell carcinoma	Relapse Free Survival	VUMC, VAMC, UTMDACC (1992-2005)	Chung	U133_X3P	g6453817_3p_a_at	28	0.142857	0.0410312	0.434669	-1.32825	0.26786	-2.60526	0.07 [0.00 - 7.41]
GENE	KIF22	kinesin family member 22	None	GSE2837	Head and neck cancer	Squamous cell carcinoma	Relapse Free Survival	VUMC, VAMC, UTMDACC (1992-2005)	Chung	U133_X3P	Hs.119324.1.S1_3p_a_at	28	0.464286	0.208396	-	-0.694934	0.773728	1.15454	3.17 [0.00 - 8311.78]
GENE	KIF22	kinesin family member 22	None	jacob-00182-CANDF	Lung cancer	Adenocarcinoma	Overall Survival	CAN/DF	Shedden	HG-U133A	202183_s_at	82	0.487805	0.00524371	0.0982493	0.976397	0.0454878	1.19793	3.31 [1.02 - 10.72]
GENE	KIF22	kinesin family member 22	None	jacob-00182-CANDF	Lung cancer	Adenocarcinoma	Overall Survival	CAN/DF	Shedden	HG-U133A	216969_s_at	82	0.756098	0.00189113	0.0432613	1.07166	0.1222	0.615265	1.85 [0.85 - 4.04]
GENE	KIF22	kinesin family member 22	None	jacob-00182-HLM	Lung cancer	Adenocarcinoma	Overall Survival	HLM	Shedden	HG-U133A	202183_s_at	79	0.835443	0.0137077	0.204118	-1.02253	0.15934	-0.489782	0.61 [0.31 - 1.21]
GENE	KIF22	kinesin family member 22	None	jacob-00182-HLM	Lung cancer	Adenocarcinoma	Overall Survival	HLM	Shedden	HG-U133A	216969_s_at	79	0.392405	0.0925893	-	-0.441164	0.606677	-0.141148	0.87 [0.51 - 1.49]
GENE	KIF22	kinesin family member 22	None	jacob-00182-MSK	Lung cancer	Adenocarcinoma	Overall Survival	MSK	Shedden	HG-U133A	216969_s_at	104	0.769231	0.00141164	0.0339802	1.0191	0.0129632	1.13835	3.12 [1.27 - 7.66]
GENE	KIF22	kinesin family member 22	None	jacob-00182-MSK	Lung cancer	Adenocarcinoma	Overall Survival	MSK	Shedden	HG-U133A	202183_s_at	104	0.278846	0.0333461	0.380051	0.919035	0.992248	0.00542501	1.01 [0.34 - 3.00]
GENE	KIF22	kinesin family member 22	None	GSE13213	Lung cancer	Adenocarcinoma	Overall Survival	Nagoya (1995-1999, 2002-2004)	Tomida	G4112F	A_23_P54622	117	0.350427	0.0605586	-	0.6034	0.118822	0.437035	1.55 [0.89 - 2.68]
GENE	KIF22	kinesin family member 22	None	GSE31210	Lung cancer	Adenocarcinoma	Overall Survival	NCCRI	Okayama	HG-U133_Plus_2	202183_s_at	204	0.509804	0.0325231	0.373831	0.807339	0.196149	0.737328	2.09 [0.68 - 6.39]
GENE	KIF22	kinesin family member 22	None	GSE31210	Lung cancer	Adenocarcinoma	Relapse Free Survival	NCCRI	Okayama	HG-U133_Plus_2	202183_s_at	204	0.22549	0.00379745	0.0761038	1.38988	0.0532355	0.797443	2.22 [0.99 - 4.98]
GENE	KIF22	kinesin family member 22	None	GSE31210	Lung cancer	Adenocarcinoma	Overall Survival	NCCRI	Okayama	HG-U133_Plus_2	216969_s_at	204	0.759804	0.0340835	0.385559	-1.4278	0.720253	-0.160614	0.85 [0.35 - 2.05]
GENE	KIF22	kinesin family member 22	None	GSE31210	Lung cancer	Adenocarcinoma	Relapse Free Survival	NCCRI	Okayama	HG-U133_Plus_2	216969_s_at	204	0.544118	0.205824	-	-0.354981	0.360986	-0.309015	0.73 [0.38 - 1.42]
GENE	KIF22	kinesin family member 22	None	jacob-00182-UM	Lung cancer	Adenocarcinoma	Overall Survival	UM	Shedden	HG-U133A	202183_s_at	178	0.376404	0.0327936	0.375884	-0.425965	0.294873	-0.343014	0.71 [0.37 - 1.35]
GENE	KIF22	kinesin family member 22	None	jacob-00182-UM	Lung cancer	Adenocarcinoma	Overall Survival	UM	Shedden	HG-U133A	216969_s_at	178	0.505618	0.143054	-	-0.290853	0.582563	-0.131001	0.88 [0.55 - 1.40]
GENE	KIF22	kinesin family member 22	None	GSE11117	Lung cancer	NSCLC	Overall Survival	Basel (2002-2005)	Baty	Novachip human 34.5k	H200012204	41	0.146341	0.0737877	-	1.64097	0.469156	0.264373	1.30 [0.64 - 2.67]
GENE	KIF22	kinesin family member 22	None	GSE3141	Lung cancer	NSCLC	Overall Survival	Duke	Bild	HG-U133_Plus_2	216969_s_at	111	0.207207	0.0496544	0.489547	0.771706	0.816524	-0.0581579	0.94 [0.58 - 1.54]
GENE	KIF22	kinesin family member 22	None	GSE3141	Lung cancer	NSCLC	Overall Survival	Duke	Bild	HG-U133_Plus_2	202183_s_at	111	0.207207	0.0271477	0.331165	-0.672588	0.827663	-0.0767947	0.93 [0.46 - 1.85]
GENE	KIF22	kinesin family member 22	None	GSE14814	Lung cancer	NSCLC	Overall Survival	JRB.10	Zhu	HG-U133A	202183_s_at	90	0.633333	0.0560994	-	-0.714825	0.498208	-0.331533	0.72 [0.28 - 1.87]
GENE	KIF22	kinesin family member 22	None	GSE14814	Lung cancer	NSCLC	Disease Specific Survival	JRB.10	Zhu	HG-U133A	202183_s_at	90	0.744444	0.108029	-	-0.84151	0.577761	-0.31443	0.73 [0.24 - 2.21]
GENE	KIF22	kinesin family member 22	None	GSE14814	Lung cancer	NSCLC	Overall Survival	JRB.10	Zhu	HG-U133A	216969_s_at	90	0.877778	0.365422	-	-0.538334	0.981275	-0.0107745	0.99 [0.40 - 2.43]
GENE	KIF22	kinesin family member 22	None	GSE14814	Lung cancer	NSCLC	Disease Specific Survival	JRB.10	Zhu	HG-U133A	216969_s_at	90	0.111111	0.145355	-	1.37224	0.477783	0.364525	1.44 [0.53 - 3.94]
GENE	KIF22	kinesin family member 22	None	GSE8894	Lung cancer	NSCLC	Relapse Free Survival	Seoul (1995-2005)	Lee	HG-U133_Plus_2	202183_s_at	138	0.224638	0.0879255	-	0.55571	0.897284	-0.0204612	0.98 [0.72 - 1.34]
GENE	KIF22	kinesin family member 22	None	GSE8894	Lung cancer	NSCLC	Relapse Free Survival	Seoul (1995-2005)	Lee	HG-U133_Plus_2	216969_s_at	138	0.869565	0.001267	0.0310596	0.96718	0.123856	0.217759	1.24 [0.94 - 1.64]
GENE	KIF22	kinesin family member 22	None	GSE4573	Lung cancer	Squamous cell carcinoma	Overall Survival	Michigan (1991-2002)	Raponi	HG-U133A	216969_s_at	129	0.744186	0.176749	-	0.36082	0.792357	0.117909	1.13 [0.47 - 2.71]
GENE	KIF22	kinesin family member 22	None	GSE4573	Lung cancer	Squamous cell carcinoma	Overall Survival	Michigan (1991-2002)	Raponi	HG-U133A	202183_s_at	129	0.581395	0.103207	-	0.401741	0.198305	0.662493	1.94 [0.71 - 5.32]
GENE	KIF22	kinesin family member 22	None	GSE17710	Lung cancer	Squamous cell carcinoma	Relapse Free Survival	UNC	Wilkerson	Agilent-UNC-custom-4X44K	26813	56	0.892857	0.0155495	0.223773	1.24662	0.29318	0.463387	1.59 [0.67 - 3.77]
GENE	KIF22	kinesin family member 22	None	GSE17710	Lung cancer	Squamous cell carcinoma	Relapse Free Survival	UNC	Wilkerson	Agilent-UNC-custom-4X44K	1824	56	0.392857	0.0308829	0.361198	0.782457	0.0833061	0.546427	1.73 [0.93 - 3.21]
GENE	KIF22	kinesin family member 22	None	GSE17710	Lung cancer	Squamous cell carcinoma	Overall Survival	UNC	Wilkerson	Agilent-UNC-custom-4X44K	26813	56	0.785714	0.0433102	0.449777	0.837818	0.482083	0.320205	1.38 [0.56 - 3.36]
GENE	KIF22	kinesin family member 22	None	GSE17710	Lung cancer	Squamous cell carcinoma	Overall Survival	UNC	Wilkerson	Agilent-UNC-custom-4X44K	1824	56	0.392857	0.0119692	0.184681	0.960695	0.0828694	0.55702	1.75 [0.93 - 3.28]
GENE	KIF22	kinesin family member 22	None	GSE9891	Ovarian cancer		Overall Survival	AOCS, RBH, WH, NKI-AVL (1992-2006)	Tothill	HG-U133_Plus_2	216969_s_at	278	0.895683	0.0756344	-	-0.590845	0.21923	-0.183149	0.83 [0.62 - 1.12]
GENE	KIF22	kinesin family member 22	None	GSE9891	Ovarian cancer		Overall Survival	AOCS, RBH, WH, NKI-AVL (1992-2006)	Tothill	HG-U133_Plus_2	202183_s_at	278	0.143885	0.057548	-	0.685254	0.461735	0.124481	1.13 [0.81 - 1.58]
GENE	KIF22	kinesin family member 22	None	DUKE-OC	Ovarian cancer		Overall Survival	Duke	Bild	HG-U133A	202183_s_at	133	0.87218	0.000919223	0.0237447	0.925376	0.353157	0.165461	1.18 [0.83 - 1.67]
GENE	KIF22	kinesin family member 22	None	DUKE-OC	Ovarian cancer		Overall Survival	Duke	Bild	HG-U133A	216969_s_at	133	0.87218	0.023585	0.300695	0.692248	0.0605148	0.227399	1.26 [0.99 - 1.59]
GENE	KIF22	kinesin family member 22	None	GSE8841	Ovarian cancer		Overall Survival	Milan (1992-2003)	Marchini	G4100A	16488	81	0.888889	0.0527183	-	1.08301	0.13264	0.836277	2.31 [0.78 - 6.86]
GENE	KIF22	kinesin family member 22	None	GSE8841	Ovarian cancer		Overall Survival	Milan (1992-2003)	Marchini	G4100A	17168	81	0.17284	0.0180742	0.249359	15.7069	0.343468	0.518114	1.68 [0.57 - 4.90]
GENE	KIF22	kinesin family member 22	None	GSE8841	Ovarian cancer		Overall Survival	Milan (1992-2003)	Marchini	G4100A	5423	81	0.320988	0.0330669	0.37795	1.90737	0.283884	0.484933	1.62 [0.67 - 3.94]
GENE	KIF22	kinesin family member 22	None	GSE8841	Ovarian cancer		Overall Survival	Milan (1992-2003)	Marchini	G4100A	17516	81	0.345679	0.21503	-	-0.661565	0.398315	-0.506743	0.60 [0.19 - 1.95]
GENE	KIF22	kinesin family member 22	None	GSE26712	Ovarian cancer		Disease Free Survival	MSKCC (1990-2003)	Bonome	HG-U133_Plus_2	216969_s_at	185	0.524324	0.0102735	0.164771	-0.418033	0.059072	-0.498263	0.61 [0.36 - 1.02]
GENE	KIF22	kinesin family member 22	None	GSE26712	Ovarian cancer		Disease Free Survival	MSKCC (1990-2003)	Bonome	HG-U133_Plus_2	202183_s_at	185	0.151351	0.151294	-	-0.340659	0.451902	-0.127671	0.88 [0.63 - 1.23]
GENE	KIF22	kinesin family member 22	None	GSE26712	Ovarian cancer		Overall Survival	MSKCC (1990-2003)	Bonome	HG-U133_Plus_2	202183_s_at	185	0.113514	0.101445	-	-0.450946	0.579405	-0.102182	0.90 [0.63 - 1.30]
GENE	KIF22	kinesin family member 22	None	GSE26712	Ovarian cancer		Overall Survival	MSKCC (1990-2003)	Bonome	HG-U133_Plus_2	216969_s_at	185	0.508108	0.00794963	0.135651	-0.468715	0.0529501	-0.559431	0.57 [0.32 - 1.01]
GENE	KIF22	kinesin family member 22	None	GSE17260	Ovarian cancer		Overall Survival	Niigata (1997-2008)	Yoshihara	G4112A	A_23_P54622	110	0.872727	0.0836869	-	0.679692	0.398432	0.213886	1.24 [0.75 - 2.03]
GENE	KIF22	kinesin family member 22	None	GSE17260	Ovarian cancer		Progression Free Survival	Niigata (1997-2008)	Yoshihara	G4112A	A_23_P54622	110	0.181818	0.0486407	0.483405	0.655953	0.320652	0.186186	1.20 [0.83 - 1.74]
GENE	KIF22	kinesin family member 22	None	GSE14764	Ovarian cancer		Overall Survival	TOC	Denkert	HG-U133A	216969_s_at	80	0.6375	0.00402509	0.0797171	1.22841	0.123128	0.782067	2.19 [0.81 - 5.91]
GENE	KIF22	kinesin family member 22	None	GSE14764	Ovarian cancer		Overall Survival	TOC	Denkert	HG-U133A	202183_s_at	80	0.1625	0.134915	-	1.0682	0.616586	0.238463	1.27 [0.50 - 3.23]
GENE	KIF22	kinesin family member 22	None	GSE16560	Prostate cancer		Overall Survival	Sweden (1977-1999)	Sboner	6K DASL	DAP3_4843	281	0.135231	0.16152	-	0.329261	0.561725	0.0515248	1.05 [0.88 - 1.25]
GENE	KIF22	kinesin family member 22	None	GSE19234	Skin cancer	Melanoma	Overall Survival	NYU	Bogunovic	HG-U133_Plus_2	216969_s_at	38	0.763158	0.00587545	0.107393	1.44664	0.0464948	1.04424	2.84 [1.02 - 7.94]
GENE	KIF22	kinesin family member 22	None	GSE19234	Skin cancer	Melanoma	Overall Survival	NYU	Bogunovic	HG-U133_Plus_2	202183_s_at	38	0.552632	0.00498096	0.0943592	1.3814	0.00593118	1.4921	4.45 [1.54 - 12.87]
GENE	KIF22	kinesin family member 22	None	GSE30929	Soft tissue cancer	Liposarcoma	Distant Recurrence Free Survival	MSKCC (1993-2008)	Gobble	HG-U133A	202183_s_at	140	0.778571	2.60E-06	0.000131116	1.29357	0.00116781	1.14457	3.14 [1.57 - 6.27]
GENE	KIF22	kinesin family member 22	None	GSE30929	Soft tissue cancer	Liposarcoma	Distant Recurrence Free Survival	MSKCC (1993-2008)	Gobble	HG-U133A	216969_s_at	140	0.55	0.00545772	0.101379	0.818347	0.112651	0.608455	1.84 [0.87 - 3.90]
