# Supplementary material for: KIF22 in the Prognosis and Immune Biomarking of Pan-Cancer
Source: Hindawi journal article supplement (doi:10.1155/2023/9542311), 2023-05-31
Supplement: f7 [file 9542311.f7.txt]

Name	Cancer	HR	CI	P.value	LR_test_pvalue	PH_test_Pvalue	Best_split	CHR	MAPINFO	UCSC_RefGene_Name	UCSC_RefGene_Group	Relation_to_UCSC_CpG_Island
cg00399295	LAML	0.72	(0.448;1.156)	0.173299153	0.158990429	0.025	q75	16	29813630	KIF22	Body	N_Shelf
cg01395760	LAML	0.871	(0.583;1.301)	0.498970229	0.503103001	0.202	q25	16	29802253	KIF22	Body	Island
cg04078251	LAML	1.232	(0.816;1.861)	0.320188468	0.328247583	0.539	q75	16	29802448	KIF22	Body	Island
cg05137064	LAML	1.308	(0.854;2.005)	0.217146594	0.228038917	0.57	q75	16	29814872	KIF22	Body	N_Shore
cg26945349	LAML	0.637	(0.422;0.963)	0.032383906	0.027238649	0.007	mean	16	29802874	KIF22	Body	S_Shore
cg00399295	ACC	0.627	(0.285;1.38)	0.246372858	0.261712957	0.52	mean	16	29813630	KIF22	Body	N_Shelf
cg01395760	ACC	9.811	(1.334;72.145)	0.024877934	0.001014607	0.255	q25	16	29802253	KIF22	Body	Island
cg04078251	ACC	0.546	(0.189;1.575)	0.26302433	0.229990747	0.709	q75	16	29802448	KIF22	Body	Island
cg05137064	ACC	1.879	(0.884;3.992)	0.100963428	0.112037652	0.598	q75	16	29814872	KIF22	Body	N_Shore
cg26945349	ACC	0.582	(0.264;1.284)	0.179994547	0.196440845	0.697	q25	16	29802874	KIF22	Body	S_Shore
cg00399295	BLCA	0.827	(0.586;1.169)	0.282798907	0.274932716	0.516	q75	16	29813630	KIF22	Body	N_Shelf
cg01395760	BLCA	1.419	(1.026;1.964)	0.034575593	0.039632228	0.845	q75	16	29802253	KIF22	Body	Island
cg04078251	BLCA	1.531	(1.115;2.101)	0.008428632	0.010490506	0.963	q75	16	29802448	KIF22	Body	Island
cg05137064	BLCA	1.174	(0.83;1.66)	0.365901767	0.359301626	0.119	q25	16	29814872	KIF22	Body	N_Shore
cg26945349	BLCA	1.379	(0.99;1.92)	0.057169353	0.063517637	0.069	q75	16	29802874	KIF22	Body	S_Shore
cg00399295	BRCA	0.641	(0.418;0.982)	0.041218703	0.048296816	0.707	q25	16	29813630	KIF22	Body	N_Shelf
cg01395760	BRCA	0.697	(0.454;1.07)	0.098883699	0.107777349	0.149	q25	16	29802253	KIF22	Body	Island
cg04078251	BRCA	1.789	(1.204;2.658)	0.003973844	0.004987465	0.023	q75	16	29802448	KIF22	Body	Island
cg05137064	BRCA	0.575	(0.374;0.882)	0.011279175	0.015023725	0.351	q25	16	29814872	KIF22	Body	N_Shore
cg26945349	BRCA	0.813	(0.523;1.264)	0.357614451	0.365641461	0.86	q25	16	29802874	KIF22	Body	S_Shore
cg00399295	CESC	0.764	(0.437;1.334)	0.343562839	0.332149217	0.799	q75	16	29813630	KIF22	Body	N_Shelf
cg01395760	CESC	1.627	(1.001;2.645)	0.049488376	0.056239632	0.449	q75	16	29802253	KIF22	Body	Island
cg04078251	CESC	1.564	(0.973;2.513)	0.064684152	0.061375846	0.635	median	16	29802448	KIF22	Body	Island
cg05137064	CESC	0.754	(0.432;1.315)	0.319263013	0.307094956	0.596	q75	16	29814872	KIF22	Body	N_Shore
cg26945349	CESC	1.625	(0.919;2.873)	0.095261741	0.081198228	0.145	q25	16	29802874	KIF22	Body	S_Shore
cg00399295	COAD	0.841	(0.484;1.464)	0.541485073	0.547181629	0.144	q25	16	29813630	KIF22	Body	N_Shelf
cg01395760	COAD	0.705	(0.411;1.207)	0.202718711	0.191094939	0.777	mean	16	29802253	KIF22	Body	Island
cg04078251	COAD	0.81	(0.485;1.354)	0.421490879	0.428131957	0.395	q25	16	29802448	KIF22	Body	Island
cg05137064	COAD	1.272	(0.786;2.057)	0.32725339	0.324841311	0.543	median	16	29814872	KIF22	Body	N_Shore
cg26945349	COAD	1.864	(1.157;3.004)	0.010521603	0.0105251	0.124	mean	16	29802874	KIF22	Body	S_Shore
cg00399295	ESCA	0.627	(0.399;0.984)	0.042407915	0.042907464	0.121	mean	16	29813630	KIF22	Body	N_Shelf
cg01395760	ESCA	1.088	(0.641;1.847)	0.754794626	0.753059696	0.827	q25	16	29802253	KIF22	Body	Island
cg04078251	ESCA	0.88	(0.553;1.401)	0.590430194	0.58870716	0.361	mean	16	29802448	KIF22	Body	Island
cg05137064	ESCA	0.72	(0.441;1.175)	0.188469226	0.198699706	0.757	q25	16	29814872	KIF22	Body	N_Shore
cg26945349	ESCA	0.659	(0.407;1.065)	0.08874745	0.097162749	0.662	q25	16	29802874	KIF22	Body	S_Shore
cg00399295	GBM	1.573	(1.003;2.467)	0.048388708	0.056338385	0.049232484	q75	16	29813630	KIF22	Body	N_Shelf
cg01395760	GBM	1.241	(0.766;2.011)	0.381414419	0.372812357	0.517838721	q25	16	29802253	KIF22	Body	Island
cg04078251	GBM	0.587	(0.366;0.942)	0.027426605	0.034459022	0.248369732	q25	16	29802448	KIF22	Body	Island
cg05137064	GBM	0.815	(0.496;1.339)	0.418858793	0.410190231	0.099207745	q75	16	29814872	KIF22	Body	N_Shore
cg26945349	GBM	0.553	(0.358;0.854)	0.007552062	0.006934172	0.071696289	median	16	29802874	KIF22	Body	S_Shore
cg00399295	HNSC	1.198	(0.894;1.607)	0.226747443	0.233138041	0.101856362	q75	16	29813630	KIF22	Body	N_Shelf
cg01395760	HNSC	0.901	(0.661;1.226)	0.5062026	0.502381014	0.35265234	q75	16	29802253	KIF22	Body	Island
cg04078251	HNSC	1.1	(0.796;1.518)	0.563677564	0.560171298	0.965901081	q25	16	29802448	KIF22	Body	Island
cg05137064	HNSC	1.303	(0.944;1.799)	0.107321402	0.098843493	0.911977064	q25	16	29814872	KIF22	Body	N_Shore
cg26945349	HNSC	1.221	(0.936;1.594)	0.141001339	0.140110983	0.565231855	mean	16	29802874	KIF22	Body	S_Shore
cg01395760	KICH	3.657	(0.76;17.61)	0.105874687	0.075252032	0.73972352	median	16	29802253	KIF22	Body	Island
cg04078251	KICH	1.672	(0.418;6.691)	0.46758174	0.481953885	0.290144602	q75	16	29802448	KIF22	Body	Island
cg05137064	KICH	3.033	(0.379;24.282)	0.295713361	0.229380087	0.102843848	mean	16	29814872	KIF22	Body	N_Shore
cg26945349	KICH	2.651	(0.331;21.208)	0.35812274	0.29848238	0.087298108	q25	16	29802874	KIF22	Body	S_Shore
cg00399295	KIRC	1.547	(1.045;2.29)	0.029243311	0.02732817	0.804070817	median	16	29813630	KIF22	Body	N_Shelf
cg01395760	KIRC	1.435	(0.978;2.106)	0.065152984	0.066952196	0.031376101	mean	16	29802253	KIF22	Body	Island
cg04078251	KIRC	1.255	(0.778;2.024)	0.352845543	0.342157473	0.241250548	q25	16	29802448	KIF22	Body	Island
cg05137064	KIRC	0.822	(0.558;1.212)	0.322698208	0.325274055	0.125218905	mean	16	29814872	KIF22	Body	N_Shore
cg26945349	KIRC	1.824	(1.07;3.107)	0.027084416	0.018094911	0.703479028	q25	16	29802874	KIF22	Body	S_Shore
cg00399295	KIRP	0.379	(0.148;0.968)	0.042671257	0.022829457	0.084227148	q75	16	29813630	KIF22	Body	N_Shelf
cg01395760	KIRP	1.59	(0.703;3.596)	0.265929567	0.242992493	0.674287594	q25	16	29802253	KIF22	Body	Island
cg04078251	KIRP	1.867	(0.99;3.523)	0.053900515	0.060709563	0.001240783	q75	16	29802448	KIF22	Body	Island
cg05137064	KIRP	0.642	(0.284;1.451)	0.286569183	0.264319229	0.355019959	q75	16	29814872	KIF22	Body	N_Shore
cg26945349	KIRP	0.312	(0.137;0.71)	0.00548745	0.001956784	0.488696921	mean	16	29802874	KIF22	Body	S_Shore
cg00399295	LGG	0.512	(0.354;0.74)	0.000378553	0.000629237	0.19	q25	16	29813630	KIF22	Body	N_Shelf
cg01395760	LGG	0.794	(0.555;1.136)	0.207001593	0.204355296	0.331	median	16	29802253	KIF22	Body	Island
cg04078251	LGG	0.763	(0.512;1.139)	0.185420463	0.177437774	0.539	q75	16	29802448	KIF22	Body	Island
cg05137064	LGG	0.586	(0.397;0.866)	0.007233955	0.009683901	0.422	q25	16	29814872	KIF22	Body	N_Shore
cg26945349	LGG	0.771	(0.529;1.123)	0.174849872	0.181697239	0.444	q25	16	29802874	KIF22	Body	S_Shore
cg00399295	LIHC	0.549	(0.376;0.802)	0.001910329	0.002979344	0.016	q25	16	29813630	KIF22	Body	N_Shelf
cg01395760	LIHC	1.342	(0.865;2.082)	0.188624372	0.175952961	0.114	q25	16	29802253	KIF22	Body	Island
cg04078251	LIHC	1.159	(0.822;1.635)	0.399308269	0.399618733	0.95	mean	16	29802448	KIF22	Body	Island
cg05137064	LIHC	0.858	(0.581;1.266)	0.439752945	0.445275487	0.451	q25	16	29814872	KIF22	Body	N_Shore
cg26945349	LIHC	0.838	(0.567;1.24)	0.377707739	0.384554683	0.463	q25	16	29802874	KIF22	Body	S_Shore
cg00399295	LUAD	0.829	(0.582;1.182)	0.300313057	0.307493437	0.698988805	q25	16	29813630	KIF22	Body	N_Shelf
cg04078251	LUAD	0.923	(0.671;1.269)	0.622737146	0.622061452	0.217701095	mean	16	29802448	KIF22	Body	Island
cg05137064	LUAD	0.8	(0.564;1.134)	0.210095544	0.217831384	0.47657855	q25	16	29814872	KIF22	Body	N_Shore
cg26945349	LUAD	0.895	(0.647;1.236)	0.499215831	0.497341339	0.030720811	mean	16	29802874	KIF22	Body	S_Shore
cg00399295	LUSC	0.903	(0.648;1.258)	0.545702085	0.547379242	0.413	mean	16	29813630	KIF22	Body	N_Shelf
cg01395760	LUSC	0.822	(0.562;1.201)	0.311276715	0.302988199	0.363	q75	16	29802253	KIF22	Body	Island
cg04078251	LUSC	1.441	(0.966;2.149)	0.073196953	0.063355328	0.565	q25	16	29802448	KIF22	Body	Island
cg05137064	LUSC	1.408	(1.024;1.938)	0.035363812	0.034273774	0.704	median	16	29814872	KIF22	Body	N_Shore
cg26945349	LUSC	1.331	(0.969;1.828)	0.076995678	0.076121174	0.669	median	16	29802874	KIF22	Body	S_Shore
cg00399295	MESO	0.651	(0.377;1.122)	0.122380685	0.109589018	0.228	q75	16	29813630	KIF22	Body	N_Shelf
cg01395760	MESO	0.713	(0.441;1.151)	0.166146753	0.16219502	0.203	mean	16	29802253	KIF22	Body	Island
cg04078251	MESO	1.397	(0.83;2.353)	0.20818648	0.219760278	0.952	q75	16	29802448	KIF22	Body	Island
cg05137064	MESO	0.751	(0.427;1.319)	0.318384536	0.306425968	0.236	q75	16	29814872	KIF22	Body	N_Shore
cg26945349	MESO	0.417	(0.237;0.734)	0.00245154	0.001206209	0.083	q75	16	29802874	KIF22	Body	S_Shore
cg00399295	PAAD	1.218	(0.75;1.976)	0.425262065	0.416861206	0.588649285	q25	16	29813630	KIF22	Body	N_Shelf
cg01395760	PAAD	1.405	(0.865;2.283)	0.16930956	0.156344105	0.239106076	q25	16	29802253	KIF22	Body	Island
cg04078251	PAAD	0.673	(0.429;1.056)	0.084880579	0.09522645	0.040296706	q25	16	29802448	KIF22	Body	Island
cg05137064	PAAD	0.63	(0.374;1.063)	0.083723409	0.069458438	0.070367387	q75	16	29814872	KIF22	Body	N_Shore
cg26945349	PAAD	1.518	(0.912;2.524)	0.108211333	0.094729796	0.065433544	q25	16	29802874	KIF22	Body	S_Shore
cg00399295	READ	6.28	(1.435;27.49)	0.014718253	0.002621304	0.369	mean	16	29813630	KIF22	Body	N_Shelf
cg01395760	READ	2.431	(0.853;6.933)	0.096531288	0.081759158	0.986	median	16	29802253	KIF22	Body	Island
cg04078251	READ	1.469	(0.557;3.873)	0.436763	0.432972135	0.982	mean	16	29802448	KIF22	Body	Island
cg05137064	READ	5.423	(0.718;40.975)	0.101323626	0.034758198	0.577	q25	16	29814872	KIF22	Body	N_Shore
cg26945349	READ	0.869	(0.281;2.689)	0.807670803	0.809952688	0.429	q25	16	29802874	KIF22	Body	S_Shore
cg00399295	SARC	0.851	(0.57;1.27)	0.429855804	0.432206333	0.031	mean	16	29813630	KIF22	Body	N_Shelf
cg01395760	SARC	1.967	(1.152;3.36)	0.013246693	0.007717319	0.875	q25	16	29802253	KIF22	Body	Island
cg04078251	SARC	0.782	(0.525;1.164)	0.225214952	0.223302391	0.507	median	16	29802448	KIF22	Body	Island
cg05137064	SARC	0.66	(0.427;1.02)	0.061244654	0.069373459	0.999	q25	16	29814872	KIF22	Body	N_Shore
cg26945349	SARC	0.779	(0.504;1.204)	0.261029184	0.253385841	0.174	mean	16	29802874	KIF22	Body	S_Shore
cg00399295	SKCM	0.636	(0.478;0.847)	0.001989988	0.00273475	0.985	q25	16	29813630	KIF22	Body	N_Shelf
cg01395760	SKCM	0.859	(0.659;1.119)	0.259224932	0.259269661	0.717	median	16	29802253	KIF22	Body	Island
cg04078251	SKCM	1.218	(0.934;1.588)	0.146325498	0.145283107	0.046	mean	16	29802448	KIF22	Body	Island
cg05137064	SKCM	0.729	(0.558;0.952)	0.020354824	0.020166762	0.052	median	16	29814872	KIF22	Body	N_Shore
cg26945349	SKCM	1.145	(0.817;1.604)	0.431649743	0.425343063	0.073	q25	16	29802874	KIF22	Body	S_Shore
cg00399295	STAD	0.8	(0.545;1.175)	0.255344703	0.246096394	0.506	q75	16	29813630	KIF22	Body	N_Shelf
cg01395760	STAD	0.776	(0.52;1.158)	0.213982273	0.202743804	0.762	q75	16	29802253	KIF22	Body	Island
cg04078251	STAD	1.536	(1.017;2.318)	0.041163922	0.033100539	0.225	q25	16	29802448	KIF22	Body	Island
cg05137064	STAD	0.782	(0.551;1.109)	0.167949726	0.175307074	0.44	q25	16	29814872	KIF22	Body	N_Shore
cg26945349	STAD	1.396	(0.93;2.093)	0.107263466	0.095997675	0.965	q25	16	29802874	KIF22	Body	S_Shore
cg00399295	UCEC	0.403	(0.251;0.646)	0.000161119	0.000279456	0.670254301	q25	16	29813630	KIF22	Body	N_Shelf
cg01395760	UCEC	0.7	(0.417;1.172)	0.175049424	0.187286309	0.390853316	q25	16	29802253	KIF22	Body	Island
cg04078251	UCEC	1.438	(0.904;2.289)	0.12533514	0.122936456	0.082180707	median	16	29802448	KIF22	Body	Island
cg05137064	UCEC	0.575	(0.356;0.931)	0.024293516	0.028958173	0.281733183	q25	16	29814872	KIF22	Body	N_Shore
cg26945349	UCEC	1.995	(1.073;3.71)	0.029160387	0.018978636	0.200107302	q25	16	29802874	KIF22	Body	S_Shore
cg00399295	UCS	1.684	(0.774;3.667)	0.189003136	0.173646097	0.993694379	q25	16	29813630	KIF22	Body	N_Shelf
cg01395760	UCS	0.584	(0.29;1.178)	0.133024946	0.127942934	0.797577956	median	16	29802253	KIF22	Body	Island
cg04078251	UCS	0.768	(0.394;1.499)	0.439752064	0.438721445	0.170149024	median	16	29802448	KIF22	Body	Island
cg05137064	UCS	0.593	(0.301;1.168)	0.130775649	0.126236971	0.786387612	median	16	29814872	KIF22	Body	N_Shore
cg26945349	UCS	2.337	(1.176;4.644)	0.015410554	0.014041959	0.804616372	median	16	29802874	KIF22	Body	S_Shore
cg00399295	UVM	0.475	(0.205;1.099)	0.081981498	0.077250185	0.648	median	16	29813630	KIF22	Body	N_Shelf
cg01395760	UVM	0.756	(0.326;1.756)	0.515575481	0.512084442	0.846	median	16	29802253	KIF22	Body	Island
cg04078251	UVM	1.66	(0.672;4.103)	0.272274009	0.288197982	0.969	q75	16	29802448	KIF22	Body	Island
cg05137064	UVM	2.267	(0.671;7.659)	0.187684692	0.146836341	0.335	q25	16	29814872	KIF22	Body	N_Shore
cg26945349	UVM	6.393	(2.481;16.471)	0.00012201	3.37E-05	0.953	mean	16	29802874	KIF22	Body	S_Shore
cg02876297	LAML	0.633	(0.425;0.943)	0.02444045	0.029378385	0.077	q25	16	29800596	KIF22	TSS1500	N_Shore
cg03462115	LAML	0.766	(0.508;1.154)	0.202079094	0.211304086	0.809	q25	16	29801729	KIF22	TSS1500	Island
cg05343105	LAML	0.874	(0.574;1.333)	0.53293178	0.53752012	0.111	q25	16	29801371	KIF22	TSS1500	N_Shore
cg05984522	LAML	0.753	(0.486;1.165)	0.202844132	0.191614498	0.561	q75	16	29801792	KIF22	TSS1500	Island
cg09815911	LAML	0.772	(0.515;1.158)	0.211532295	0.220296005	0.67	q25	16	29801824	KIF22	TSS1500	Island
cg12688670	LAML	0.807	(0.56;1.164)	0.25084976	0.249847437	0.141	median	16	29801602	KIF22	TSS1500	N_Shore
cg02876297	ACC	1.843	(0.854;3.98)	0.119284262	0.133187347	0.22	q75	16	29800596	KIF22	TSS1500	N_Shore
cg03462115	ACC	2.931	(1.4;6.134)	0.004332022	0.004951092	0.587	mean	16	29801729	KIF22	TSS1500	Island
cg05343105	ACC	2.667	(0.927;7.679)	0.068981879	0.042004916	0.321	q25	16	29801371	KIF22	TSS1500	N_Shore
cg05984522	ACC	2.385	(0.83;6.856)	0.106739446	0.074525463	0.659	q25	16	29801792	KIF22	TSS1500	Island
cg09815911	ACC	3.906	(1.176;12.978)	0.02613192	0.008357011	0.472	q25	16	29801824	KIF22	TSS1500	Island
cg12688670	ACC	0.584	(0.276;1.239)	0.161274799	0.154701589	0.604	median	16	29801602	KIF22	TSS1500	N_Shore
cg02876297	BLCA	0.8	(0.567;1.127)	0.2018133	0.193430141	0.406	q75	16	29800596	KIF22	TSS1500	N_Shore
cg03462115	BLCA	1.218	(0.854;1.737)	0.275749508	0.267043198	0.077	q25	16	29801729	KIF22	TSS1500	Island
cg05343105	BLCA	0.812	(0.577;1.142)	0.230690023	0.222783717	0.729	q75	16	29801371	KIF22	TSS1500	N_Shore
cg05984522	BLCA	1.295	(0.965;1.739)	0.0854423	0.086870895	0.888	mean	16	29801792	KIF22	TSS1500	Island
cg09815911	BLCA	1.249	(0.881;1.77)	0.211264034	0.202390978	0.405	q25	16	29801824	KIF22	TSS1500	Island
cg12688670	BLCA	0.736	(0.531;1.021)	0.066172631	0.072759747	0.115	q25	16	29801602	KIF22	TSS1500	N_Shore
cg02876297	BRCA	0.744	(0.482;1.151)	0.184387667	0.19463667	0.746	q25	16	29800596	KIF22	TSS1500	N_Shore
cg03462115	BRCA	0.56	(0.336;0.934)	0.026303428	0.018483741	0.641	q75	16	29801729	KIF22	TSS1500	Island
cg05343105	BRCA	0.855	(0.577;1.265)	0.432379764	0.431185291	0.882	mean	16	29801371	KIF22	TSS1500	N_Shore
cg05984522	BRCA	0.8	(0.542;1.181)	0.261325405	0.259578129	0.335	median	16	29801792	KIF22	TSS1500	Island
cg09815911	BRCA	0.724	(0.486;1.08)	0.113149869	0.109259603	0.154	median	16	29801824	KIF22	TSS1500	Island
cg12688670	BRCA	0.772	(0.487;1.224)	0.271451185	0.261235977	0.714	q75	16	29801602	KIF22	TSS1500	N_Shore
cg02876297	CESC	1.093	(0.686;1.743)	0.707454428	0.70757855	0.99	median	16	29800596	KIF22	TSS1500	N_Shore
cg03462115	CESC	0.622	(0.378;1.023)	0.06161141	0.055485891	0.572	mean	16	29801729	KIF22	TSS1500	Island
cg05343105	CESC	0.853	(0.505;1.444)	0.554448989	0.559430812	0.29	q25	16	29801371	KIF22	TSS1500	N_Shore
cg05984522	CESC	0.678	(0.406;1.132)	0.136980264	0.148100177	0.802	q25	16	29801792	KIF22	TSS1500	Island
cg09815911	CESC	1.887	(1.171;3.04)	0.009087362	0.011362576	0.068	q75	16	29801824	KIF22	TSS1500	Island
cg12688670	CESC	0.732	(0.45;1.19)	0.207641613	0.201295896	0.158	mean	16	29801602	KIF22	TSS1500	N_Shore
cg02876297	COAD	1.182	(0.63;2.218)	0.601847925	0.595577645	0.293	q25	16	29800596	KIF22	TSS1500	N_Shore
cg03462115	COAD	1.371	(0.772;2.435)	0.281313408	0.267764469	0.497	q25	16	29801729	KIF22	TSS1500	Island
cg05343105	COAD	1.309	(0.744;2.304)	0.350420409	0.339504229	0.901	q25	16	29801371	KIF22	TSS1500	N_Shore
cg05984522	COAD	0.87	(0.54;1.402)	0.567222556	0.566217313	0.265	median	16	29801792	KIF22	TSS1500	Island
cg12688670	COAD	1.258	(0.782;2.025)	0.344212335	0.346546771	0.488	mean	16	29801602	KIF22	TSS1500	N_Shore
cg02876297	ESCA	0.784	(0.494;1.244)	0.301528001	0.306112774	0.522	mean	16	29800596	KIF22	TSS1500	N_Shore
cg03462115	ESCA	1.284	(0.769;2.145)	0.339383456	0.33039027	0.219	q25	16	29801729	KIF22	TSS1500	Island
cg05343105	ESCA	0.952	(0.58;1.564)	0.846765593	0.847292952	0.318	q25	16	29801371	KIF22	TSS1500	N_Shore
cg05984522	ESCA	0.83	(0.525;1.311)	0.424452253	0.422504532	0.054	mean	16	29801792	KIF22	TSS1500	Island
cg09815911	ESCA	0.817	(0.505;1.322)	0.411256106	0.416840282	0.599	q25	16	29801824	KIF22	TSS1500	Island
cg12688670	ESCA	1.169	(0.74;1.847)	0.504016928	0.505945505	0.506	mean	16	29801602	KIF22	TSS1500	N_Shore
cg02876297	GBM	0.537	(0.339;0.849)	0.007878524	0.010893678	0.658292194	q25	16	29800596	KIF22	TSS1500	N_Shore
cg03462115	GBM	0.54	(0.346;0.844)	0.006886334	0.009393188	0.439678804	q25	16	29801729	KIF22	TSS1500	Island
cg05343105	GBM	1.358	(0.81;2.276)	0.246042528	0.232072158	0.374911715	q25	16	29801371	KIF22	TSS1500	N_Shore
cg05984522	GBM	0.744	(0.477;1.16)	0.191942535	0.201135019	0.861388948	q25	16	29801792	KIF22	TSS1500	Island
cg09815911	GBM	0.585	(0.361;0.949)	0.029707342	0.035565764	0.018633401	q25	16	29801824	KIF22	TSS1500	Island
cg12688670	GBM	0.705	(0.464;1.072)	0.101873568	0.098268121	0.538976645	mean	16	29801602	KIF22	TSS1500	N_Shore
cg02876297	HNSC	1.16	(0.851;1.58)	0.34800193	0.341968751	0.23645359	mean	16	29800596	KIF22	TSS1500	N_Shore
cg03462115	HNSC	0.765	(0.556;1.051)	0.098287914	0.090380668	0.830574397	q75	16	29801729	KIF22	TSS1500	Island
cg05343105	HNSC	1.393	(1.044;1.86)	0.024413221	0.027960137	0.394906654	q75	16	29801371	KIF22	TSS1500	N_Shore
cg05984522	HNSC	0.858	(0.621;1.186)	0.354221335	0.347337732	0.804532933	q75	16	29801792	KIF22	TSS1500	Island
cg09815911	HNSC	0.636	(0.473;0.854)	0.002597151	0.001912327	0.761237049	mean	16	29801824	KIF22	TSS1500	Island
cg12688670	HNSC	0.779	(0.578;1.049)	0.100086046	0.106773848	0.862688447	q25	16	29801602	KIF22	TSS1500	N_Shore
cg02876297	KICH	3.463	(0.719;16.678)	0.12148967	0.089363017	0.99409562	median	16	29800596	KIF22	TSS1500	N_Shore
cg03462115	KICH	2.635	(0.707;9.821)	0.148863031	0.163492622	0.285924038	q75	16	29801729	KIF22	TSS1500	Island
cg05343105	KICH	2.902	(0.777;10.838)	0.113105417	0.128015504	0.379941405	q75	16	29801371	KIF22	TSS1500	N_Shore
cg05984522	KICH	2.87	(0.359;22.948)	0.320306046	0.256267798	0.656165256	q25	16	29801792	KIF22	TSS1500	Island
cg09815911	KICH	3.029	(0.379;24.229)	0.296182996	0.229808661	0.711757443	q25	16	29801824	KIF22	TSS1500	Island
cg12688670	KICH	0	(0;Inf)	0.998185758	0.005167129	0.999985991	mean	16	29801602	KIF22	TSS1500	N_Shore
cg02876297	KIRC	0.629	(0.389;1.015)	0.057484733	0.047143085	0.56895182	q75	16	29800596	KIF22	TSS1500	N_Shore
cg03462115	KIRC	0.745	(0.505;1.097)	0.136274633	0.134890569	0.710503858	median	16	29801729	KIF22	TSS1500	Island
cg05343105	KIRC	1.273	(0.807;2.008)	0.300158233	0.290000083	0.720411218	q25	16	29801371	KIF22	TSS1500	N_Shore
cg05984522	KIRC	0.542	(0.356;0.826)	0.004340405	0.003132767	0.956520438	mean	16	29801792	KIF22	TSS1500	Island
cg09815911	KIRC	0.39	(0.247;0.614)	4.91E-05	1.38E-05	0.627096777	mean	16	29801824	KIF22	TSS1500	Island
cg12688670	KIRC	1.313	(0.894;1.93)	0.165457666	0.164102061	0.902081285	median	16	29801602	KIF22	TSS1500	N_Shore
cg02876297	KIRP	1.422	(0.762;2.654)	0.26844273	0.266868423	0.046004894	median	16	29800596	KIF22	TSS1500	N_Shore
cg03462115	KIRP	2.992	(1.6;5.596)	0.000599645	0.000970016	0.805967168	q75	16	29801729	KIF22	TSS1500	Island
cg05343105	KIRP	2.313	(1.227;4.36)	0.009518212	0.012715591	0.089294961	q75	16	29801371	KIF22	TSS1500	N_Shore
cg05984522	KIRP	0.815	(0.432;1.538)	0.5287425	0.526296589	0.441818982	mean	16	29801792	KIF22	TSS1500	Island
cg09815911	KIRP	1.421	(0.762;2.651)	0.269543218	0.272049386	0.108350842	mean	16	29801824	KIF22	TSS1500	Island
cg12688670	KIRP	2.49	(0.975;6.362)	0.056610383	0.033359133	0.696278666	q25	16	29801602	KIF22	TSS1500	N_Shore
cg02876297	LGG	0.582	(0.397;0.853)	0.005469231	0.007426693	0.002	q25	16	29800596	KIF22	TSS1500	N_Shore
cg03462115	LGG	0.839	(0.564;1.248)	0.385773228	0.392070263	0.181	q25	16	29801729	KIF22	TSS1500	Island
cg05343105	LGG	0.338	(0.203;0.562)	2.95E-05	2.93E-06	0.037	q75	16	29801371	KIF22	TSS1500	N_Shore
cg05984522	LGG	0.718	(0.495;1.043)	0.081858164	0.087907185	0.286	q25	16	29801792	KIF22	TSS1500	Island
cg09815911	LGG	1.369	(0.956;1.961)	0.086391441	0.086527311	0.357	median	16	29801824	KIF22	TSS1500	Island
cg12688670	LGG	0.477	(0.322;0.706)	0.000215487	0.000422052	0.879	q25	16	29801602	KIF22	TSS1500	N_Shore
cg02876297	LIHC	1.276	(0.906;1.799)	0.163578701	0.163318244	0.463	median	16	29800596	KIF22	TSS1500	N_Shore
cg03462115	LIHC	2.031	(1.302;3.169)	0.001787559	0.000819362	0.931	q25	16	29801729	KIF22	TSS1500	Island
cg05343105	LIHC	1.349	(0.878;2.072)	0.17223134	0.159856536	0.221	q25	16	29801371	KIF22	TSS1500	N_Shore
cg05984522	LIHC	1.338	(0.887;2.018)	0.165530378	0.155351935	0.021	q25	16	29801792	KIF22	TSS1500	Island
cg09815911	LIHC	1.353	(0.895;2.045)	0.151560812	0.140684988	0.594	q25	16	29801824	KIF22	TSS1500	Island
cg12688670	LIHC	0.929	(0.659;1.31)	0.675836779	0.675967653	0.799	median	16	29801602	KIF22	TSS1500	N_Shore
cg02876297	LUAD	1.171	(0.815;1.682)	0.394040921	0.388274632	0.425323859	q25	16	29800596	KIF22	TSS1500	N_Shore
cg03462115	LUAD	1.18	(0.81;1.718)	0.38967434	0.382599199	0.552589809	q25	16	29801729	KIF22	TSS1500	Island
cg05343105	LUAD	1.071	(0.783;1.466)	0.666435986	0.666307027	0.598235257	median	16	29801371	KIF22	TSS1500	N_Shore
cg05984522	LUAD	1.065	(0.774;1.465)	0.697585632	0.698107028	0.179263215	mean	16	29801792	KIF22	TSS1500	Island
cg12688670	LUAD	1.256	(0.88;1.794)	0.209428966	0.201914729	0.63073191	q25	16	29801602	KIF22	TSS1500	N_Shore
cg02876297	LUSC	1.273	(0.839;1.932)	0.255841149	0.24384832	0.802	q25	16	29800596	KIF22	TSS1500	N_Shore
cg03462115	LUSC	0.946	(0.682;1.314)	0.741211357	0.740723157	0.682	mean	16	29801729	KIF22	TSS1500	Island
cg05343105	LUSC	1.498	(0.995;2.257)	0.053065926	0.043773028	0.331	q25	16	29801371	KIF22	TSS1500	N_Shore
cg05984522	LUSC	0.9	(0.612;1.325)	0.594841433	0.591245016	0.646	q75	16	29801792	KIF22	TSS1500	Island
cg09815911	LUSC	0.803	(0.58;1.113)	0.187814682	0.18450989	0.682	mean	16	29801824	KIF22	TSS1500	Island
cg12688670	LUSC	1.349	(0.981;1.856)	0.065257537	0.064337719	0.009	median	16	29801602	KIF22	TSS1500	N_Shore
cg02876297	MESO	1.64	(1.029;2.614)	0.037629923	0.037281371	0.205	median	16	29800596	KIF22	TSS1500	N_Shore
cg03462115	MESO	1.409	(0.806;2.464)	0.229400145	0.21560202	0.922	q25	16	29801729	KIF22	TSS1500	Island
cg05343105	MESO	0.699	(0.404;1.21)	0.201242041	0.18827379	0.567	q75	16	29801371	KIF22	TSS1500	N_Shore
cg05984522	MESO	1.274	(0.796;2.037)	0.312484096	0.315501752	0.362	mean	16	29801792	KIF22	TSS1500	Island
cg09815911	MESO	0.853	(0.499;1.458)	0.560830133	0.565981264	0.514	q25	16	29801824	KIF22	TSS1500	Island
cg12688670	MESO	1.729	(1.081;2.767)	0.022396297	0.021493281	0.763	median	16	29801602	KIF22	TSS1500	N_Shore
cg02876297	PAAD	1.448	(0.932;2.251)	0.099540024	0.109028548	0.462005777	q75	16	29800596	KIF22	TSS1500	N_Shore
cg03462115	PAAD	0.788	(0.51;1.219)	0.284949023	0.292925553	0.026280034	q25	16	29801729	KIF22	TSS1500	Island
cg05343105	PAAD	0.715	(0.478;1.07)	0.102589649	0.100258695	0.656738856	median	16	29801371	KIF22	TSS1500	N_Shore
cg05984522	PAAD	2.301	(1.517;3.49)	8.87E-05	7.33E-05	0.871268221	median	16	29801792	KIF22	TSS1500	Island
cg09815911	PAAD	1.556	(1.041;2.325)	0.031145261	0.030905077	0.485507442	median	16	29801824	KIF22	TSS1500	Island
cg12688670	PAAD	0.778	(0.475;1.274)	0.31875639	0.307294859	0.507341803	q75	16	29801602	KIF22	TSS1500	N_Shore
cg02876297	READ	3.581	(1.164;11.013)	0.026040488	0.015236783	0.897	median	16	29800596	KIF22	TSS1500	N_Shore
cg03462115	READ	2.673	(0.611;11.7)	0.191807586	0.140596594	0.28	q25	16	29801729	KIF22	TSS1500	Island
cg05343105	READ	0.733	(0.28;1.917)	0.526479106	0.528411064	0.632	mean	16	29801371	KIF22	TSS1500	N_Shore
cg05984522	READ	1.68	(0.615;4.587)	0.311779993	0.302492311	0.68	median	16	29801792	KIF22	TSS1500	Island
cg09815911	READ	4.798	(0.631;36.506)	0.129836036	0.056572993	0.936	q25	16	29801824	KIF22	TSS1500	Island
cg12688670	READ	0.592	(0.218;1.606)	0.303310952	0.317707915	0.333	q25	16	29801602	KIF22	TSS1500	N_Shore
cg02876297	SARC	0.883	(0.581;1.342)	0.559999711	0.562796392	0.911	mean	16	29800596	KIF22	TSS1500	N_Shore
cg03462115	SARC	0.855	(0.543;1.347)	0.499627411	0.494236285	0.844	mean	16	29801729	KIF22	TSS1500	Island
cg05343105	SARC	1.346	(0.906;2)	0.14075443	0.140869919	0.964	mean	16	29801371	KIF22	TSS1500	N_Shore
cg05984522	SARC	1.168	(0.784;1.74)	0.446319565	0.448303748	0.52	mean	16	29801792	KIF22	TSS1500	Island
cg09815911	SARC	1.334	(0.836;2.129)	0.227067092	0.215742146	0.329	q25	16	29801824	KIF22	TSS1500	Island
cg12688670	SARC	1.342	(0.841;2.142)	0.216619863	0.205173677	0.094	q25	16	29801602	KIF22	TSS1500	N_Shore
cg02876297	SKCM	1.494	(1.079;2.07)	0.015603637	0.012110944	0.629	q25	16	29800596	KIF22	TSS1500	N_Shore
cg03462115	SKCM	0.814	(0.601;1.103)	0.184437195	0.191332228	0.239	q25	16	29801729	KIF22	TSS1500	Island
cg05343105	SKCM	0.692	(0.53;0.904)	0.006863729	0.006578443	0.34	median	16	29801371	KIF22	TSS1500	N_Shore
cg05984522	SKCM	0.922	(0.68;1.249)	0.59900788	0.6014504	0.488	q25	16	29801792	KIF22	TSS1500	Island
cg09815911	SKCM	0.816	(0.625;1.065)	0.134789058	0.133701396	0.448	median	16	29801824	KIF22	TSS1500	Island
cg12688670	SKCM	0.645	(0.491;0.849)	0.001720219	0.001463294	0.455	mean	16	29801602	KIF22	TSS1500	N_Shore
cg02876297	STAD	1.137	(0.772;1.673)	0.516098689	0.511151812	0.377	q25	16	29800596	KIF22	TSS1500	N_Shore
cg03462115	STAD	0.844	(0.583;1.221)	0.367883354	0.374612619	0.638	q25	16	29801729	KIF22	TSS1500	Island
cg05343105	STAD	0.746	(0.541;1.031)	0.075583973	0.074586391	0.811	mean	16	29801371	KIF22	TSS1500	N_Shore
cg05984522	STAD	1.285	(0.932;1.772)	0.125986766	0.12583245	0.718	median	16	29801792	KIF22	TSS1500	Island
cg09815911	STAD	1.303	(0.873;1.944)	0.195399131	0.184005813	0.722	q25	16	29801824	KIF22	TSS1500	Island
cg12688670	STAD	0.665	(0.467;0.949)	0.024417359	0.020892384	0.18	mean	16	29801602	KIF22	TSS1500	N_Shore
cg02876297	UCEC	1.992	(1.237;3.208)	0.004595928	0.006327643	0.835426989	q75	16	29800596	KIF22	TSS1500	N_Shore
cg03462115	UCEC	1.425	(0.807;2.516)	0.221747425	0.206463527	0.952883727	q25	16	29801729	KIF22	TSS1500	Island
cg05343105	UCEC	0.621	(0.378;1.019)	0.059450596	0.067987643	0.755661607	q25	16	29801371	KIF22	TSS1500	N_Shore
cg05984522	UCEC	1.562	(0.983;2.482)	0.059013651	0.058229599	0.960579975	median	16	29801792	KIF22	TSS1500	Island
cg12688670	UCEC	0.689	(0.413;1.151)	0.154830137	0.165883335	0.652410875	q25	16	29801602	KIF22	TSS1500	N_Shore
cg02876297	UCS	0.817	(0.42;1.589)	0.551254388	0.551200092	0.74931285	median	16	29800596	KIF22	TSS1500	N_Shore
cg03462115	UCS	0.571	(0.287;1.137)	0.110882668	0.104727933	0.643044222	median	16	29801729	KIF22	TSS1500	Island
cg05343105	UCS	0.774	(0.395;1.517)	0.455785105	0.453667959	0.506415928	mean	16	29801371	KIF22	TSS1500	N_Shore
cg05984522	UCS	0.583	(0.277;1.228)	0.155970451	0.172365187	0.262372485	q25	16	29801792	KIF22	TSS1500	Island
cg09815911	UCS	0.557	(0.269;1.151)	0.11387583	0.127659681	0.978266541	q25	16	29801824	KIF22	TSS1500	Island
cg12688670	UCS	0.498	(0.239;1.04)	0.063573271	0.053223861	0.371491408	mean	16	29801602	KIF22	TSS1500	N_Shore
cg02876297	UVM	0.715	(0.31;1.647)	0.430633179	0.428317692	0.454	median	16	29800596	KIF22	TSS1500	N_Shore
cg03462115	UVM	1.569	(0.533;4.62)	0.413938788	0.391828226	0.396	q25	16	29801729	KIF22	TSS1500	Island
cg05343105	UVM	1.938	(0.816;4.606)	0.134030587	0.124844049	0.3	median	16	29801371	KIF22	TSS1500	N_Shore
cg05984522	UVM	0.576	(0.195;1.702)	0.318535835	0.291294351	0.369	q75	16	29801792	KIF22	TSS1500	Island
cg09815911	UVM	0.64	(0.263;1.558)	0.325790155	0.313421602	0.244	mean	16	29801824	KIF22	TSS1500	Island
cg12688670	UVM	2.226	(0.91;5.445)	0.079395251	0.068040547	0.155	median	16	29801602	KIF22	TSS1500	N_Shore
cg04352115	LAML	1.099	(0.718;1.683)	0.663845396	0.666419155	0.552	q75	16	29801967	KIF22	TSS200	Island
cg07038191	LAML	1.439	(0.924;2.241)	0.107276778	0.096015863	0.741	q25	16	29801882	KIF22	TSS200	Island
cg11255039	LAML	0.794	(0.517;1.22)	0.292888538	0.302420514	0.171	q25	16	29801946	KIF22	TSS200	Island
cg04352115	ACC	2.251	(0.783;6.474)	0.132087958	0.0980343	0.76	q25	16	29801967	KIF22	TSS200	Island
cg07038191	ACC	2.069	(0.986;4.339)	0.054428766	0.062037971	0.134	q75	16	29801882	KIF22	TSS200	Island
cg11255039	ACC	2.968	(1.412;6.239)	0.004104664	0.00636337	0.877	q75	16	29801946	KIF22	TSS200	Island
cg04352115	BLCA	1.187	(0.841;1.675)	0.330663549	0.337844037	0.06	q75	16	29801967	KIF22	TSS200	Island
cg07038191	BLCA	1.122	(0.838;1.504)	0.439298665	0.439031983	0.178	median	16	29801882	KIF22	TSS200	Island
cg11255039	BLCA	1.286	(0.957;1.728)	0.095625662	0.095649782	0.044	median	16	29801946	KIF22	TSS200	Island
cg04352115	BRCA	0.665	(0.443;0.999)	0.04924104	0.045438009	0.578	mean	16	29801967	KIF22	TSS200	Island
cg07038191	BRCA	0.799	(0.494;1.293)	0.361040828	0.350772363	0.926	q75	16	29801882	KIF22	TSS200	Island
cg11255039	BRCA	0.778	(0.523;1.158)	0.216492929	0.213399321	0.611	mean	16	29801946	KIF22	TSS200	Island
cg04352115	CESC	1.566	(0.974;2.517)	0.064272676	0.0609994	0.816	median	16	29801967	KIF22	TSS200	Island
cg07038191	CESC	0.776	(0.466;1.293)	0.329942254	0.338719602	0.282	q25	16	29801882	KIF22	TSS200	Island
cg11255039	CESC	0.599	(0.375;0.958)	0.032264532	0.031156559	0.105	median	16	29801946	KIF22	TSS200	Island
cg04352115	COAD	0.741	(0.448;1.225)	0.242621519	0.251038618	0.872	q25	16	29801967	KIF22	TSS200	Island
cg07038191	COAD	0.786	(0.485;1.273)	0.327252626	0.324197527	0.981	median	16	29801882	KIF22	TSS200	Island
cg11255039	COAD	0.906	(0.534;1.538)	0.714844692	0.716871083	0.563	q25	16	29801946	KIF22	TSS200	Island
cg04352115	ESCA	1.103	(0.655;1.86)	0.711951916	0.709740167	0.95	q25	16	29801967	KIF22	TSS200	Island
cg11255039	ESCA	1.14	(0.684;1.902)	0.615326541	0.61176445	0.022	q25	16	29801946	KIF22	TSS200	Island
cg04352115	GBM	0.632	(0.405;0.986)	0.043172339	0.050360378	0.689955044	q25	16	29801967	KIF22	TSS200	Island
cg07038191	GBM	0.695	(0.453;1.067)	0.096165237	0.091293207	0.300294265	mean	16	29801882	KIF22	TSS200	Island
cg11255039	GBM	0.716	(0.46;1.114)	0.138761502	0.131973372	0.940737646	mean	16	29801946	KIF22	TSS200	Island
cg04352115	HNSC	0.843	(0.637;1.116)	0.233756645	0.229480801	0.766301577	mean	16	29801967	KIF22	TSS200	Island
cg07038191	HNSC	0.9	(0.672;1.205)	0.478143164	0.481538567	0.786797727	q25	16	29801882	KIF22	TSS200	Island
cg11255039	HNSC	0.87	(0.631;1.198)	0.392013347	0.385876418	0.712332333	q75	16	29801946	KIF22	TSS200	Island
cg04352115	KICH	2.97	(0.371;23.761)	0.304981822	0.239468673	0.694453983	q25	16	29801967	KIF22	TSS200	Island
cg07038191	KICH	4.189	(0.868;20.21)	0.074424376	0.048363998	0.600411989	median	16	29801882	KIF22	TSS200	Island
cg11255039	KICH	4.143	(0.86;19.955)	0.076393992	0.049913035	0.478369776	median	16	29801946	KIF22	TSS200	Island
cg04352115	KIRC	0.434	(0.254;0.741)	0.002198323	0.000802383	0.290365416	q75	16	29801967	KIF22	TSS200	Island
cg07038191	KIRC	0.403	(0.229;0.709)	0.001632578	0.000468044	0.230703601	q75	16	29801882	KIF22	TSS200	Island
cg11255039	KIRC	1.348	(0.842;2.157)	0.213934202	0.201268469	0.242583462	q25	16	29801946	KIF22	TSS200	Island
cg04352115	KIRP	0.796	(0.424;1.492)	0.476216245	0.474211411	0.021813187	median	16	29801967	KIF22	TSS200	Island
cg07038191	KIRP	0.49	(0.257;0.935)	0.030413208	0.036893896	0.699073541	q25	16	29801882	KIF22	TSS200	Island
cg11255039	KIRP	3.358	(1.794;6.284)	0.000151504	0.000293702	0.543701181	q75	16	29801946	KIF22	TSS200	Island
cg04352115	LGG	1.112	(0.77;1.605)	0.572809037	0.573882146	0.059	mean	16	29801967	KIF22	TSS200	Island
cg07038191	LGG	0.765	(0.53;1.103)	0.151110841	0.147049326	0.664	mean	16	29801882	KIF22	TSS200	Island
cg11255039	LGG	0.696	(0.469;1.031)	0.070466315	0.078363114	0.733	q25	16	29801946	KIF22	TSS200	Island
cg07038191	LIHC	1.414	(1.001;1.998)	0.049533904	0.051198926	0.598	mean	16	29801882	KIF22	TSS200	Island
cg11255039	LIHC	2.276	(1.426;3.635)	0.00057031	0.000170826	0.976	q25	16	29801946	KIF22	TSS200	Island
cg04352115	LUAD	0.877	(0.608;1.266)	0.48495805	0.4898295	0.492084842	q25	16	29801967	KIF22	TSS200	Island
cg07038191	LUAD	0.814	(0.567;1.168)	0.264670139	0.272726792	0.71679177	q25	16	29801882	KIF22	TSS200	Island
cg11255039	LUAD	1.313	(0.959;1.798)	0.089061503	0.088354767	0.782664454	median	16	29801946	KIF22	TSS200	Island
cg04352115	LUSC	0.666	(0.448;0.988)	0.043246996	0.035661957	0.979	q75	16	29801967	KIF22	TSS200	Island
cg07038191	LUSC	0.757	(0.547;1.046)	0.091409476	0.089079924	0.577	median	16	29801882	KIF22	TSS200	Island
cg11255039	LUSC	0.886	(0.599;1.31)	0.54296991	0.538365925	0.702	q75	16	29801946	KIF22	TSS200	Island
cg04352115	MESO	0.612	(0.362;1.034)	0.066275745	0.076528276	0.866	q25	16	29801967	KIF22	TSS200	Island
cg07038191	MESO	1.256	(0.79;1.997)	0.335248204	0.335238116	0.579	mean	16	29801882	KIF22	TSS200	Island
cg11255039	MESO	1.952	(1.096;3.475)	0.023083496	0.016166044	0.882	q25	16	29801946	KIF22	TSS200	Island
cg04352115	PAAD	0.813	(0.544;1.215)	0.312079551	0.310662619	0.107975348	median	16	29801967	KIF22	TSS200	Island
cg07038191	PAAD	1.383	(0.868;2.205)	0.172787705	0.18449216	0.297645886	q75	16	29801882	KIF22	TSS200	Island
cg11255039	PAAD	1.19	(0.801;1.77)	0.389129179	0.388865398	0.403676307	median	16	29801946	KIF22	TSS200	Island
cg04352115	READ	0.494	(0.178;1.373)	0.176301327	0.169672509	0.856	median	16	29801967	KIF22	TSS200	Island
cg07038191	READ	1.219	(0.458;3.249)	0.691797682	0.690418209	0.133	mean	16	29801882	KIF22	TSS200	Island
cg11255039	READ	0.754	(0.285;1.997)	0.570586253	0.568020577	0.308	median	16	29801946	KIF22	TSS200	Island
cg04352115	SARC	0.82	(0.526;1.28)	0.383495024	0.390622669	0.418	q25	16	29801967	KIF22	TSS200	Island
cg07038191	SARC	0.797	(0.536;1.187)	0.264118125	0.262259041	0.036	median	16	29801882	KIF22	TSS200	Island
cg11255039	SARC	0.84	(0.542;1.301)	0.434160654	0.440132635	0.556	q25	16	29801946	KIF22	TSS200	Island
cg04352115	SKCM	0.842	(0.615;1.153)	0.284160718	0.277079803	0.576	q75	16	29801967	KIF22	TSS200	Island
cg07038191	SKCM	0.822	(0.631;1.072)	0.147732888	0.14727268	0.789	median	16	29801882	KIF22	TSS200	Island
cg11255039	SKCM	0.822	(0.625;1.081)	0.161378376	0.158547732	0.188	mean	16	29801946	KIF22	TSS200	Island
cg04352115	STAD	0.886	(0.641;1.224)	0.462853533	0.461896825	0.246	median	16	29801967	KIF22	TSS200	Island
cg07038191	STAD	1.136	(0.795;1.623)	0.483030091	0.487041517	0.716	q75	16	29801882	KIF22	TSS200	Island
cg11255039	STAD	0.916	(0.664;1.263)	0.592794251	0.592580202	0.83	median	16	29801946	KIF22	TSS200	Island
cg07038191	UCEC	1.35	(0.775;2.351)	0.289253347	0.276244583	0.498999469	q25	16	29801882	KIF22	TSS200	Island
cg11255039	UCEC	0.824	(0.488;1.392)	0.469503227	0.476440396	0.608687559	q25	16	29801946	KIF22	TSS200	Island
cg04352115	UCS	0.592	(0.286;1.227)	0.15847423	0.172263328	0.479931326	q25	16	29801967	KIF22	TSS200	Island
cg07038191	UCS	1.385	(0.645;2.976)	0.403708472	0.392263653	0.894026822	q25	16	29801882	KIF22	TSS200	Island
cg11255039	UCS	1.544	(0.672;3.55)	0.306107257	0.286344777	0.718558088	q25	16	29801946	KIF22	TSS200	Island
cg04352115	UVM	0.573	(0.239;1.378)	0.213627974	0.228408825	0.058	q25	16	29801967	KIF22	TSS200	Island
cg07038191	UVM	0.491	(0.202;1.196)	0.117550796	0.104258519	0.564	mean	16	29801882	KIF22	TSS200	Island
cg11255039	UVM	2.518	(1.019;6.226)	0.045528542	0.055334938	0.909	q75	16	29801946	KIF22	TSS200	Island
