# Supplementary material for: KIF22 in the Prognosis and Immune Biomarking of Pan-Cancer
Source: Hindawi journal article supplement (doi:10.1155/2023/9542311), 2023-05-31
Supplement: f9 [file 9542311.f9.txt]

Cancer type	Basophils enriched		Basophils decreased		B-cells enriched		B-cells decreased		CD4+ memory T-cells enriched		CD4+ memory T-cells decreased		CD8+ T-cells enriched		CD8+ T-cells decreased		Eosinophils enriched		Eosinophils decreased		Macrophages enriched		Macrophages decreased		Mesenchymal stem cells enriched		Mesenchymal stem cells decreased		Natural killer T-cells enriched		Natural killer T-cells decreased		Regulatory T-cells enriched		Regulatory T-cells decreased		Type 1 T-helper cells enriched		Type 1 T-helper cells decreased		Type 2 T-helper cells enriched		Type 2 T-helper cells decreased
	HR	logrank P	HR	logrank P	HR	logrank P	HR	logrank P	HR	logrank P	HR	logrank P	HR	logrank P	HR	logrank P	HR	logrank P	HR	logrank P	HR	logrank P	HR	logrank P	HR	logrank P	HR	logrank P	HR	logrank P	HR	logrank P	HR	logrank P	HR	logrank P	HR	logrank P	HR	logrank P	HR	logrank P	HR	logrank P
Bladder Carcinoma	0.82	0.4469	0.71	0.0877	1.42	0.198	0.74	0.1174	0.78	0.2598	0.71	0.1078	0.71	0.0819	0.74	0.2171	0.76	0.1791	0.7	0.1158	0.32	0.0002	1.44	0.0635	0.71	0.0586	0.74	0.3086	0.68	0.0689	0.67	0.0983	0.65	0.1834	0.69	0.0395	0.78	0.1691	0.58	0.1265	0.7	0.0382	1.7	0.157
Breast cancer	1.3	0.1406	2.14	0.0527	1.41	0.1516	1.42	0.1261	1.23	0.3353	1.67	0.0495	1.8	0.0582	1.27	0.2214	1.47	0.2175	1.4	0.0886	1.61	0.0298	0.73	0.2312	1.3	0.1761	1.42	0.2777	1.53	0.1374	1.68	0.013	1.77	0.0094	0.75	0.2707	1.74	0.0415	1.41	0.1029	1.59	0.0588	0.77	0.3084
Cervical squamous cell carcinoma	0.28	1.20E-05	0.31	0.0012	0.3	3.70E-06	0.23	0.0049	0.24	5.00E-09	0.41	0.1105	0.14	6.60E-10	0.51	0.0386	0.14	1.20E-05	0.35	8.40E-05	0.23	0.0003	0.3	8.00E-06	0.12	0.0137	0.24	9.50E-08	0.17	6.30E-05	0.35	7.20E-05	0.4	0.0191	0.27	2.90E-06	0.28	6.30E-08	0.16	0.0541	0.28	1.90E-08	NA	NA
Esophageal Adenocarcinoma	NA	NA	1.76	0.1277	3.58	0.0027	1.51	0.4094	2.24	0.0595	0.49	0.2681	2.66	0.0368	2.86	0.036	2.47	0.0056	NA	NA	2.58	0.1454	2.5	0.0144	NA	NA	2.41	0.0157	0.54	0.2224	2.85	0.0149	2.55	0.0061	NA	NA	0.37	0.3367	2.58	0.0091	2.22	0.0134	NA	NA
Esophageal Squamous Cell Carcinoma	0.28	0.0925	0.41	0.098	0.34	0.2967	0.39	0.0658	0.43	0.3045	0.31	0.0223	0.29	0.0367	0.52	0.264	0.59	0.2034	NA	NA	0.41	0.4058	0.28	0.0085	2.43	0.1476	0.17	0.0029	0.36	0.1162	0.29	0.0188	0.37	0.0311	NA	NA	0.55	0.2776	0.32	0.0622	0.5	0.0994	NA	NA
Head-neck squamous cell carcinoma	0.59	0.0303	1.54	0.028	0.47	0.0089	1.36	0.123	0.43	0.0006	1.4	0.1301	0.65	0.0575	0.63	0.027	0.61	0.0453	1.49	0.0712	1.52	0.0865	0.65	0.0437	1.74	0.0115	0.56	0.0177	0.44	0.0117	1.31	0.1412	1.38	0.0878	0.43	0.0013	0.55	0.0044	1.89	0.08	0.67	0.0137	4.58	0.1351
Kidney renal clear cell carcinoma	2.68	1.30E-05	1.94	0.0017	2.59	2.30E-06	1.63	0.0325	2	0.0002	2.64	0.0003	2.24	3.70E-06	1.8	0.0645	1.85	0.01	2.79	8.50E-07	1.82	0.0005	6.5	7.20E-05	2.24	0.1061	1.67	0.0027	1.72	0.0382	1.65	0.0101	1.45	0.2388	2.24	9.90E-06	2.71	0.0783	1.7	0.0015	3.01	0.0041	1.71	0.0016
Kidney renal papillary cell carcinoma	0.58	0.2781	2.41	0.0212	2.19	0.0528	0.48	0.1648	7.4	0.0001	0.81	0.6233	3.49	0.0749	1.96	0.0947	0.62	0.3071	3.64	0.0044	1.67	0.1467	0.64	0.4614	2.92	0.0298	1.96	0.1382	1.81	0.1638	2.58	0.0668	0.62	0.4046	2.16	0.0469	3.61	0.0233	1.23	0.5987	NA	NA	0.72	0.3535
Liver hepatocellular carcinoma	NA	NA	1.85	0.0072	2.46	0.0642	1.73	0.0074	1.9	0.1234	1.7	0.0097	1.94	0.0615	2.14	0.003	NA	NA	1.59	0.0111	2.19	0.0089	2	0.0122	2.07	0.0826	1.64	0.036	1.89	0.013	1.44	0.2365	1.73	0.0252	1.48	0.2157	2.2	0.0075	1.56	0.2361	1.37	0.2523	1.67	0.0661
Lung adenocarcinoma	0.66	0.1198	1.21	0.3622	1.13	0.4853	0.69	0.2161	0.77	0.1464	1.51	0.131	0.78	0.251	1.5	0.1305	1.55	0.063	0.66	0.0827	1.14	0.4197	0.48	0.0723	0.82	0.282	1.32	0.3501	0.63	0.0729	1.36	0.157	0.77	0.2153	1.55	0.1272	0.47	0.0037	1.27	0.2731	0.78	0.1712	1.42	0.2512
Lung squamous cell carcinoma	1.37	0.106	0.58	0.0204	0.75	0.0977	1.43	0.2074	0.86	0.3734	0.43	0.0038	0.7	0.13	0.79	0.2212	0.55	0.0056	1.32	0.1283	0.76	0.1165	0.66	0.1725	0.73	0.0723	0.78	0.3318	0.1	7.40E-08	0.89	0.4425	0.76	0.1814	0.8	0.3089	1.65	0.0509	0.69	0.104	0.82	0.1991	0.18	0.0018
Ovarian cancer	0.67	0.0165	0.77	0.3223	0.77	0.1174	0.6	0.0257	0.74	0.2267	0.73	0.0434	0.69	0.3374	0.752	0.0354	0.65	0.1136	0.8	0.1621	0.78	0.1465	0.67	0.0706	0.8	0.2875	0.64	0.0242	0.77	0.1779	0.63	0.0484	0.53	0.1297	0.78	0.0825	0.81	0.1172	2.17	0.1434	0.76	0.1148	0.69	0.1324
Pancreatic ductal adenocarcinoma	NA	NA	1.55	0.0398	2	0.0918	1.56	0.0786	1.83	0.2306	1.69	0.0345	0.6	0.1598	1.7	0.0578	1.74	0.0193	0.32	0.063	1.61	0.0766	2.32	0.032	1.44	0.0982	0.28	0.0799	2.42	0.0447	1.32	0.3048	1.98	0.0468	1.53	0.1141	NA	NA	1.72	0.0133	1.79	0.1456	1.33	0.2611
Pheochromocytoma and Paraganglioma	0	0.1191	7.11	0.048	NA	NA	2.44	0.2622	NA	NA	2.41	0.2704	6.06	0.0754	0	0.1573	2.25	0.4038	1882610807	0.0699	381739763.4	0.282	0.33	0.2383	3.55	0.1432	NA	NA	2.28	0.3041	NA	NA	3.59	0.1357	0	0.0714	NA	NA	3.91	0.1076	NA	NA	2.41	0.2685
Rectum adenocarcinoma	NA	NA	0.57	0.2614	0.11	0.0291	0.65	0.4394	0.57	0.3376	NA	NA	3306655427	0.1859	0.53	0.2651	0.37	0.2491	1.51	0.4952	0.2	0.0526	1.92	0.2697	0.67	0.53	0.18	0.0299	0.54	0.2736	0	0.0921	0	0.0148	0.38	0.1983	0.46	0.3348	0.49	0.282	0.64	0.3852	NA	NA
Sarcoma	1.76	0.0744	1.9	0.1063	0.65	0.3102	2.34	0.0044	0.44	0.0309	2.93	0.0006	2.33	0.0207	1.46	0.2473	1.87	0.1126	1.91	0.0278	1.38	0.3463	3.71	0.0013	1.74	0.0554	2.14	0.0755	1.86	0.0224	0.47	0.0481	1.98	0.1006	1.86	0.0395	0.75	0.3133	1.64	0.1015	1.72	0.0497	307101490.7	0.0207
Stomach adenocarcinoma	1.91	0.1457	0.71	0.0582	0.57	0.0286	0.7	0.1661	0.62	0.0545	0.74	0.2159	0.64	0.0595	0.61	0.0458	0.72	0.1052	0.38	0.0027	0.78	0.3098	0.55	0.0111	0.83	0.4624	0.56	0.0082	0.56	0.0542	0.6	0.0725	0.5	0.0003	2.57	0.0211	1.31	0.2983	0.61	0.0256	0.69	0.0317	3.32	0.2298
Testicular Germ Cell Tumor	0.32	0.3905	2922009293	0.1008	0.45	0.4558	NA	NA	2.46	0.4479	NA	NA	0.3	0.371	1047348357	0.2807	NA	NA	3.96	0.2243	0.35	0.2715	NA	NA	3.39	0.2903	3198511932	0.1904	2.1	0.4517	NA	NA	8384293620	0.0973	0.27	0.2621	2.07	0.4609	NA	NA	2.12	0.4455	NA	NA
Thymoma	0.04	3.10E-05	NA	NA	0.08	0.0002	NA	NA	0.03	4.00E-06	NA	NA	0.08	0.0002	NA	NA	NA	NA	0.04	2.70E-05	NA	NA	0	0.1578	0	0.0465	0	0.0031	0.16	0.0838	0	0.0003	NA	NA	0.08	0.0001	0.08	0.0161	0.29	0.2609	NA	NA	0.07	0.0019
Thyroid carcinoma	0.36	0.1715	0	0.0055	0	0.0195	0.33	0.0435	0	0.0651	0.4	0.1148	2.11	0.3497	0	0.0012	0	0.0503	0.39	0.1236	0.11	0.0134	0.24	0.1417	0	0.0324	0.27	0.0338	0.09	0.0073	1.99	0.3784	0.37	0.0731	0	0.0833	0	0.2008	0.32	0.0431	NA	NA	0.34	0.0385
Uterine corpus endometrial carcinoma	0.57	0.2058	3.22	0.263	0.26	0.0246	2.12	0.2307	0.33	0.0709	2.51	0.0982	0.24	0.0451	0.71	0.3909	0.23	0.0609	0.55	0.1526	0.33	0.1395	1.78	0.2925	0.31	0.03	1.71	0.2264	1.77	0.3232	0.52	0.1957	0.24	0.1866	0.53	0.1245	0.58	0.1723	0	0.17	0.55	0.1514	5.78	0.0192
