# Supplementary material for: KIF22 in the Prognosis and Immune Biomarking of Pan-Cancer
Source: Hindawi journal article supplement (doi:10.1155/2023/9542311), 2023-05-31
Supplement: f10 [file 9542311.f10.txt]

Compound	RNAtype	RNAmolecule	Omics	Source	T.stat	T.fdr	Chi.stat	Chi.fdr	Pearson.stat	Pearson.fdr	Spearman.stat	Spearman.fdr	Details
5-Fluorouracil	mRNA	KIF22	CNV	GDSC	-	-	-	-	0.12419519	0.000385188	0.12560468	0.000372663
AR-42	mRNA	KIF22	CNV	GDSC	-	-	-	-	-	-	0.083161019	0.021802674
AT-7519	mRNA	KIF22	CNV	GDSC	-	-	-	-	-	-	0.088014928	0.024827347
Axitinib	mRNA	KIF22	CNV	GDSC	-	-	-	-	0.10736374	0.002908815	0.109080885	0.002019746
AZD7762	mRNA	KIF22	CNV	GDSC	-	-	-	-	0.11825253	0.000838716	0.092417664	0.010763709
AZD8055	mRNA	KIF22	CNV	GDSC	-	-	-	-	0.07633265	0.02728461	0.071978785	0.039132607
BAY-61-3606	mRNA	KIF22	CNV	GDSC	-	-	-	-	0.11114527	0.001675683	0.120157626	0.000770233
Belinostat	mRNA	KIF22	CNV	GDSC	-	-	-	-	-	-	0.074602321	0.047015902
BIX02189	mRNA	KIF22	CNV	GDSC	-	-	-	-	0.11153087	0.001157123	0.11256311	0.000868689
Bleomycin	mRNA	KIF22	CNV	GDSC	-	-	-	-	-	-	0.091669845	0.026210259
Bleomycin (50 uM)	mRNA	KIF22	CNV	GDSC	-	-	-	-	0.12705578	0.001260975	0.107193865	0.010030601
BMS-345541	mRNA	KIF22	CNV	GDSC	-	-	-	-	-	-	0.093002301	0.008158622
Bosutinib	mRNA	KIF22	CNV	GDSC	-	-	-	-	0.07736228	0.04602851	-	-
BX-912	mRNA	KIF22	CNV	GDSC	-	-	-	-	0.11331751	0.001526198	0.137009261	0.000111236
BX795	mRNA	KIF22	CNV	GDSC	-	-	-	-	0.08789906	0.02657792	-	-
Cabozantinib	mRNA	KIF22	CNV	GDSC	-	-	-	-	0.08170361	0.02335066	-	-
CAY10603	mRNA	KIF22	CNV	GDSC	-	-	-	-	-	-	0.091830988	0.00950557
Cisplatin	mRNA	KIF22	CNV	GDSC	-	-	-	-	0.10485427	0.01818879	0.114376009	0.008103039
CP466722	mRNA	KIF22	CNV	GDSC	-	-	-	-	0.0973069	0.006950229	0.104426864	0.003265815
CUDC-101	mRNA	KIF22	CNV	GDSC	-	-	-	-	-	-	0.078284544	0.036158741
CX-5461	mRNA	KIF22	CNV	GDSC	-	-	-	-	0.13428221	0.000131959	0.143380152	4.07E-05
Cytarabine	mRNA	KIF22	CNV	GDSC	-	-	-	-	0.13397803	0.002094994	0.130752021	0.003074798
Dabrafenib	mRNA	KIF22	CNV	GDSC	-	-	-	-	-	-	0.093500206	0.014020266
Daporinad	mRNA	KIF22	CNV	GDSC	-	-	-	-	0.11061285	0.001251688	0.116708361	0.000527548
Doxorubicin	mRNA	KIF22	CNV	GDSC	-	-	-	-	-	-	0.118756734	0.00683966
Etoposide	mRNA	KIF22	CNV	GDSC	-	-	-	-	0.11997899	0.003754354	0.138440713	0.000628518
Foretinib	mRNA	KIF22	CNV	GDSC	-	-	-	-	0.11838441	0.000668311	0.085313248	0.015941426
Gemcitabine	mRNA	KIF22	CNV	GDSC	-	-	-	-	0.11350197	0.007408523	0.106959904	0.0074188
Genentech Cpd 10	mRNA	KIF22	CNV	GDSC	-	-	-	-	-	-	0.091869932	0.008889092
GSK1070916	mRNA	KIF22	CNV	GDSC	-	-	-	-	0.1122697	0.001577686	0.133208211	0.000123317
GSK429286A	mRNA	KIF22	CNV	GDSC	-	-	-	-	0.07937362	0.03132911	0.097600292	0.005295545
GSK650394	mRNA	KIF22	CNV	GDSC	-	-	-	-	-	-	0.087674902	0.03854625
GSK690693	mRNA	KIF22	CNV	GDSC	-	-	-	-	-	-	0.071989835	0.046453127
GW-2580	mRNA	KIF22	CNV	GDSC	-	-	-	-	0.09594127	0.017254	0.10952123	0.004690807
Idelalisib	mRNA	KIF22	CNV	GDSC	-	-	-	-	0.07177266	0.04848645	0.07735174	0.028266357
IPA-3	mRNA	KIF22	CNV	GDSC	-	-	-	-	-	-	0.082867375	0.032083159
Ispinesib Mesylate	mRNA	KIF22	CNV	GDSC	-	-	-	-	0.1015482	0.003220167	0.12066242	0.000357768
KIN001-236	mRNA	KIF22	CNV	GDSC	-	-	-	-	0.0781142	0.0314853	0.085995795	0.017316356
KIN001-244	mRNA	KIF22	CNV	GDSC	-	-	-	-	0.1157368	0.000968687	0.109094156	0.001655875
KIN001-260	mRNA	KIF22	CNV	GDSC	-	-	-	-	0.1136433	0.0010752	0.121106062	0.000403272
KIN001-270	mRNA	KIF22	CNV	GDSC	-	-	-	-	0.0944661	0.008592459	0.105086386	0.002862512
KU-55933	mRNA	KIF22	CNV	GDSC	-	-	-	-	-	-	0.079686236	0.039147285
Lenalidomide	mRNA	KIF22	CNV	GDSC	-	-	-	-	-	-	0.075082948	0.042404572
Lestaurtinib	mRNA	KIF22	CNV	GDSC	-	-	-	-	0.1250705	0.000389085	0.102509135	0.004398899
Linifanib	mRNA	KIF22	CNV	GDSC	-	-	-	-	0.1013385	0.006415435	-	-
Masitinib	mRNA	KIF22	CNV	GDSC	-	-	-	-	0.09086554	0.009756769	0.089100637	0.010591332
Methotrexate	mRNA	KIF22	CNV	GDSC	-	-	-	-	0.07918326	0.02372466	0.070938938	0.047774886
Mitomycin-C	mRNA	KIF22	CNV	GDSC	-	-	-	-	0.09774928	0.02382668	0.111002376	0.005452504
MPS-1-IN-1	mRNA	KIF22	CNV	GDSC	-	-	-	-	0.09647356	0.009681425	0.091471504	0.0148293
Navitoclax	mRNA	KIF22	CNV	GDSC	-	-	-	-	0.08604836	0.01155724	0.095514736	0.004929712
NG-25	mRNA	KIF22	CNV	GDSC	-	-	-	-	0.1227549	0.000296977	0.121225245	0.000385601
NPK76-II-72-1	mRNA	KIF22	CNV	GDSC	-	-	-	-	0.08778151	0.01190287	0.093164187	0.006985572
NSC-207895	mRNA	KIF22	CNV	GDSC	-	-	-	-	0.1282043	0.001140267	0.132039541	0.000808635
NU7441	mRNA	KIF22	CNV	GDSC	-	-	-	-	0.07253406	0.04854921	0.079224982	0.035386956
Nutlin-3a (-)	mRNA	KIF22	CNV	GDSC	-	-	-	-	0.1399741	3.28E-05	0.13470724	6.34E-05
NVP-BHG712	mRNA	KIF22	CNV	GDSC	-	-	-	-	0.09447133	0.006684073	0.083064974	0.016940426
Olaparib	mRNA	KIF22	CNV	GDSC	-	-	-	-	0.129845	0.001415947	0.123529075	0.002107071
OSI-027	mRNA	KIF22	CNV	GDSC	-	-	-	-	-	-	0.07889778	0.02700151
OSI-930	mRNA	KIF22	CNV	GDSC	-	-	-	-	0.1008176	0.01085398	0.090924334	0.02120829
OSU-03012	mRNA	KIF22	CNV	GDSC	-	-	-	-	0.07981859	0.03756435	0.085529553	0.034005599
Palbociclib	mRNA	KIF22	CNV	GDSC	-	-	-	-	0.1064275	0.004565275	0.086110372	0.025996813
PFI-3	mRNA	KIF22	CNV	GDSC	-	-	-	-	0.07900517	0.03432187	0.078422057	0.036164648
PHA-793887	mRNA	KIF22	CNV	GDSC	-	-	-	-	0.0901093	0.01162238	0.101352049	0.00511324
PI-103	mRNA	KIF22	CNV	GDSC	-	-	-	-	-	-	0.083632607	0.027459547
PLX-4720	mRNA	KIF22	CNV	GDSC	-	-	-	-	-	-	0.077607042	0.048149499
Ponatinib	mRNA	KIF22	CNV	GDSC	-	-	-	-	0.09467104	0.01333875	-	-
QL-X-138	mRNA	KIF22	CNV	GDSC	-	-	-	-	0.07744676	0.04347493	0.101497787	0.005674526
QL-XI-92	mRNA	KIF22	CNV	GDSC	-	-	-	-	0.1182109	0.000877099	0.120114062	0.000841369
QL-XII-47	mRNA	KIF22	CNV	GDSC	-	-	-	-	-	-	0.096905932	0.014213667
Quizartinib	mRNA	KIF22	CNV	GDSC	-	-	-	-	0.079399	0.03440002	0.074405678	0.046635878
Ruxolitinib	mRNA	KIF22	CNV	GDSC	-	-	-	-	-	-	0.087411227	0.018338141
SB505124	mRNA	KIF22	CNV	GDSC	-	-	-	-	0.1078017	0.002806474	0.097193141	0.005695095
SN-38	mRNA	KIF22	CNV	GDSC	-	-	-	-	0.1910631	6.31E-07	0.174443883	8.01E-06
SNX-2112	mRNA	KIF22	CNV	GDSC	-	-	-	-	0.09294044	0.008870351	0.106849839	0.002145789
STF-62247	mRNA	KIF22	CNV	GDSC	-	-	-	-	-	-	0.09139213	0.010470319
T0901317	mRNA	KIF22	CNV	GDSC	-	-	-	-	0.1275922	0.000179141	0.107787351	0.001446224
TAK-715	mRNA	KIF22	CNV	GDSC	-	-	-	-	0.08752496	0.01090006	0.111223014	0.0010555
Talazoparib	mRNA	KIF22	CNV	GDSC	-	-	-	-	0.1211353	0.01958496	0.106293075	0.037293434
THZ-2-102-1	mRNA	KIF22	CNV	GDSC	-	-	-	-	0.08312566	0.01932139	0.098543452	0.005340568
Tivozanib	mRNA	KIF22	CNV	GDSC	-	-	-	-	0.1351536	0.000154658	0.135005888	9.22E-05
TL-1-85	mRNA	KIF22	CNV	GDSC	-	-	-	-	0.1102251	0.001320896	0.10843893	0.001616139
TL-2-105	mRNA	KIF22	CNV	GDSC	-	-	-	-	-	-	0.090542005	0.011063578
TPCA-1	mRNA	KIF22	CNV	GDSC	-	-	-	-	0.1049473	0.002318502	0.097675171	0.003915818
Tretinoin	mRNA	KIF22	CNV	GDSC	-	-	-	-	0.07827222	0.03283537	-	-
Tubastatin A	mRNA	KIF22	CNV	GDSC	-	-	-	-	0.08845531	0.01449537	0.105084475	0.00327523
UNC1215	mRNA	KIF22	CNV	GDSC	-	-	-	-	0.07971594	0.03764663	-	-
Veliparib	mRNA	KIF22	CNV	GDSC	-	-	-	-	0.09033405	0.01552484	0.090539475	0.014666324
Vinblastine	mRNA	KIF22	CNV	GDSC	-	-	-	-	0.1016583	0.007093635	0.100516983	0.006099026
Vismodegib	mRNA	KIF22	CNV	GDSC	-	-	-	-	0.08272482	0.01722685	0.096691924	0.005493142
VNLG/124	mRNA	KIF22	CNV	GDSC	-	-	-	-	0.07664518	0.03863461	0.076547576	0.039316484
VX-11e	mRNA	KIF22	CNV	GDSC	-	-	-	-	-	-	0.078106604	0.029798734
VX-702	mRNA	KIF22	CNV	GDSC	-	-	-	-	0.1036025	0.002341341	0.11122357	0.001130885
WZ3105	mRNA	KIF22	CNV	GDSC	-	-	-	-	-	-	0.078879348	0.048503885
XMD13-2	mRNA	KIF22	CNV	GDSC	-	-	-	-	0.08429266	0.01630831	0.09347835	0.007908563
XMD14-99	mRNA	KIF22	CNV	GDSC	-	-	-	-	0.09917738	0.004212867	0.113093337	0.000984878
XMD15-27	mRNA	KIF22	CNV	GDSC	-	-	-	-	0.1086512	0.00300056	0.107268527	0.002841522
Y-39983	mRNA	KIF22	CNV	GDSC	-	-	-	-	0.1151687	0.001448686	0.112909018	0.001760815
YM201636	mRNA	KIF22	CNV	GDSC	-	-	-	-	0.07567115	0.0272028	0.077626655	0.022183039
(-)-avarol	mRNA	KIF22	Expression	CellMiner	-	-	-	-	0.43604763	0.01062908	-	-
(2,2-dimethyl)-1,3-propandiyl-bis(2,3-dichloro)maleimide	mRNA	KIF22	Expression	CellMiner	-	-	-	-	0.37381848	0.0240565	-	-
(24s)-24-o-acetyl,-7,8-didehydroshengmanol xyloside	mRNA	KIF22	Expression	CellMiner	-	-	-	-	0.44885793	0.00777159	-	-
(5Z)-7-Oxozeaenol	mRNA	KIF22	Expression	GDSC	-	-	-	-	0.20367256	8.13E-09	0.187830111	1.82E-07
(z)-3-bromo-3-iodo-2-phenylpropenal	mRNA	KIF22	Expression	CellMiner	-	-	-	-	0.37476506	0.03081715	-	-
1,1'-(benzo[d][1,3]dioxol-5-ylmethylene)dipiperazine	mRNA	KIF22	Expression	CellMiner	-	-	-	-	-	-	0.3940614	0.026204316
1,1'-biphenyl, 4,4'bis(thiomethyl)-	mRNA	KIF22	Expression	CellMiner	-	-	-	-	0.51214131	0.002974654	0.513581483	0.007420998
1,1-dimethylethyl methyl diester, (z, e)	mRNA	KIF22	Expression	CellMiner	-	-	-	-	0.38122879	0.03214123	-	-
1,3-dithiolo[3,4-d]pyrimidine-2-thione, 5,7-dichloro-	mRNA	KIF22	Expression	CellMiner	-	-	-	-	0.47014889	0.001915305	-	-
1,3-isoquinolinedione, 4-[(3,4-dimethoxyphenyl)methylene]-	mRNA	KIF22	Expression	CellMiner	-	-	-	-	0.36370964	0.03923759	-	-
1,4-naphthalenedione, 5-methoxy-	mRNA	KIF22	Expression	CellMiner	-	-	-	-	0.39508245	0.01711933	-	-
1,4-naphthalenedione, 7-(benzoyloxy)-5-methoxy-	mRNA	KIF22	Expression	CellMiner	-	-	-	-	0.40756092	0.01494314	-	-
1,4-pentadien-3-one, 1,5-di-3-pyridyl-	mRNA	KIF22	Expression	CellMiner	-	-	-	-	0.38782085	0.02409806	0.374890585	0.036087383
1,5-dihydroxy-1,5-di(pyridin-3-yl)pentan-3-one	mRNA	KIF22	Expression	CellMiner	-	-	-	-	0.47766478	0.002710482	0.360033904	0.04961498
1,8-octanediamine, n,n'-di-9-acridinyl- (9ci)	mRNA	KIF22	Expression	CellMiner	-	-	-	-	0.42342746	0.02029979	0.430927406	0.025215701
1-(1h-indazol-3-yl)-3-(4-methoxyphenyl)urea	mRNA	KIF22	Expression	CellMiner	-	-	-	-	0.4094757	0.04761038	-	-
1-decarboxy-3-oxo-ceanothic acid	mRNA	KIF22	Expression	CellMiner	-	-	-	-	0.42122121	0.01558751	-	-
1-methyl-3-octadecylimidazolium chloride	mRNA	KIF22	Expression	CellMiner	-	-	-	-	0.35997525	0.04714755	-	-
1-penten-3-one, 5-(4-morpholinyl)-1-phenyl-, hydrochloride	mRNA	KIF22	Expression	CellMiner	-	-	-	-	0.50884333	0.001086671	-	-
1-penten-4-yn-3-one, 5-(2,4-dimethoxypyrimidin-5-yl)-	mRNA	KIF22	Expression	CellMiner	-	-	-	-	0.37932638	0.02791907	-	-
1h-benzo[a]carbazole-1,4(11h)-dione, 8-methoxy-11- methyl-	mRNA	KIF22	Expression	CellMiner	-	-	-	-	0.40550317	0.013366	-	-
1h-imidazole-4,5-dicarboxylic acid, 2-phenyl- (9ci)	mRNA	KIF22	Expression	CellMiner	-	-	-	-	0.46125905	0.003497775	-	-
2'-azido-2'-deoxycytidine	mRNA	KIF22	Expression	CellMiner	-	-	-	-	0.48266868	0.003511133	-	-
2'-deoxy-2'-fluorocytidine	mRNA	KIF22	Expression	CellMiner	-	-	-	-	0.44796754	0.005761104	-	-
2(1h)-quinoxalinone, 3-(bromomethyl)-	mRNA	KIF22	Expression	CellMiner	-	-	-	-	0.39226171	0.02631185	-	-
2,1,3-benzothiadiazole, 7-bromo-5-methyl-4-nitro-	mRNA	KIF22	Expression	CellMiner	-	-	-	-	0.40127372	0.04717405	-	-
2,3,6-tribromo-7-chloro-3,7-dimethyl-1-octene	mRNA	KIF22	Expression	CellMiner	-	-	-	-	0.41540496	0.01391274	-	-
2,4-diaminohexahydropyrimidine-5-carbonitrile	mRNA	KIF22	Expression	CellMiner	-	-	-	-	0.41062376	0.03908872	-	-
2,5-pyrrolidinedione, 1-(3-ethynylphenyl)-	mRNA	KIF22	Expression	CellMiner	-	-	-	-	0.35692672	0.04704194	-	-
2-(3,4-dibromo-4-methylpentyl)-1,3-butadiene	mRNA	KIF22	Expression	CellMiner	-	-	-	-	0.41168082	0.03537052	-	-
2-[(z)-bromoiodomethylidene] cyclohexanone	mRNA	KIF22	Expression	CellMiner	-	-	-	-	0.45909881	0.003513865	-	-
2-amino-4-(2-hydroxy-4-methylphenyl)-5-phenylpyrimidine	mRNA	KIF22	Expression	CellMiner	-	-	-	-	0.35624984	0.04594938	-	-
2-amino-5,8-dihydroxy-1,4-naphthoquinone	mRNA	KIF22	Expression	CellMiner	-	-	-	-	0.37571985	0.0300344	-	-
2-bromo-5,8-dihydroxy-3-methyl-1,4-naphthoquinone	mRNA	KIF22	Expression	CellMiner	-	-	-	-	0.38793161	0.01881619	-	-
2-bromo-8-hydroxy-6-methyl-1,4-naphthoquinone	mRNA	KIF22	Expression	CellMiner	-	-	-	-	0.42943875	0.008082488	-	-
2-chloro-2',3'-dideoxyadenosine	mRNA	KIF22	Expression	CellMiner	-	-	-	-	0.42005139	0.02190359	-	-
2-chloro-3-(2-butoxyethoxy)naphthazarin	mRNA	KIF22	Expression	CellMiner	-	-	-	-	0.38214715	0.02707144	-	-
2-chloro-3-(2-hydroxy-1,1-dimethyl-ethylamino)naphthazarin	mRNA	KIF22	Expression	CellMiner	-	-	-	-	0.38847443	0.02731257	-	-
2-chloro-3-(3-chloro-propyloxy)-naphthazarin	mRNA	KIF22	Expression	CellMiner	-	-	-	-	0.38913571	0.0210197	-	-
2-chloro-3-[2-(2-butoxyethoxy)ethoxy]-naphthazarin	mRNA	KIF22	Expression	CellMiner	-	-	-	-	0.39512102	0.01857403	-	-
2-hydroxyethylthio-3-methylnaphthoquinone	mRNA	KIF22	Expression	CellMiner	-	-	-	-	0.38341293	0.02694785	-	-
2-propen-1-one, 3-(1-naphthalenyl)-1-phenyl- (9ci)	mRNA	KIF22	Expression	CellMiner	-	-	-	-	0.41960504	0.01230066	-	-
2-propenone, 1,1'-(2,5-pyridinediyl)bis[3-(2-furanyl)-	mRNA	KIF22	Expression	CellMiner	-	-	-	-	0.40401844	0.01932217	-	-
2-pyridinone, 3-chloro-4-hydroxy-1-beta-d-ribofuranosyl-	mRNA	KIF22	Expression	CellMiner	-	-	-	-	0.40227537	0.02628229	-	-
3,3-diiodo-2-phenyl-2-propenal	mRNA	KIF22	Expression	CellMiner	-	-	-	-	0.34752796	0.04593147	-	-
3,3?-thiene-2,5-diylbis(5-methoxy-1h-indole)	mRNA	KIF22	Expression	CellMiner	-	-	-	-	0.47874436	0.003602134	-	-
3,5-dimethoxy-beta-methyl-beta-nitrostyrene	mRNA	KIF22	Expression	CellMiner	-	-	-	-	0.43742804	0.009041778	-	-
3-(2-furyl)acrolein	mRNA	KIF22	Expression	CellMiner	-	-	-	-	0.40569229	0.02639722	-	-
3-(tert-butyldimethylsilyloxymethyl)-3-butene-2-one	mRNA	KIF22	Expression	CellMiner	-	-	-	-	0.35411679	0.04210809	-	-
3-acridineamine, 9-[[(4-nitrophenyl)methyl]thio]-	mRNA	KIF22	Expression	CellMiner	-	-	-	-	0.37147263	0.02576828	-	-
3-amino-n-(4-butoxyphenyl)-1h-indazole-1-carboxamide	mRNA	KIF22	Expression	CellMiner	-	-	-	-	0.48963932	0.001378502	-	-
3-chloro-7-nitro-1,2,4-benzotriazine 1-oxide	mRNA	KIF22	Expression	CellMiner	-	-	-	-	0.3572251	0.04454019	-	-
3-chloromethyl-6-hydroxyamino-1-(methanesulfonyl)indoline	mRNA	KIF22	Expression	CellMiner	-	-	-	-	0.43370482	0.01461485	-	-
3-deazaneplanocin, hydrochloride	mRNA	KIF22	Expression	CellMiner	-	-	-	-	0.37413187	0.04223929	-	-
3-methoxy-2-phenoxy-2-phenylimidazo[1,2-b]pyridazine	mRNA	KIF22	Expression	CellMiner	-	-	-	-	0.37244784	0.03079917	-	-
4,7-[bis-n,n'-(3-amino-9-thioacetamido)-acridine]-biphenyl	mRNA	KIF22	Expression	CellMiner	-	-	-	-	0.39716396	0.01640452	-	-
4-aminopiazthiole	mRNA	KIF22	Expression	CellMiner	-	-	-	-	0.3826926	0.02347504	-	-
4-butanediyldihydroguaiaretic acid	mRNA	KIF22	Expression	CellMiner	-	-	-	-	0.46118627	0.004421275	-	-
4-morpholinecarbodithioic acid, antimony complex	mRNA	KIF22	Expression	CellMiner	-	-	-	-	0.44036418	0.007568189	0.417433105	0.013228723
4-piperidinone, 3,5-bis[(4-nitrophenyl)methylene]-, (e,e)-	mRNA	KIF22	Expression	CellMiner	-	-	-	-	0.44202708	0.0124903	-	-
4-thiomorpholinecarbodithioic acid, antimony complex	mRNA	KIF22	Expression	CellMiner	-	-	-	-	0.40276127	0.01570564	-	-
5,8-quinolinedione, 2-chloro-6-methoxy-4-methyl-7-propyl-	mRNA	KIF22	Expression	CellMiner	-	-	-	-	0.48422221	0.002762398	-	-
5-epi-phomopsolide d	mRNA	KIF22	Expression	CellMiner	-	-	-	-	0.36733816	0.03566852	-	-
5-Fluorouracil	mRNA	KIF22	Expression	GDSC	-	-	-	-	-0.12817071	0.000234272	-0.140820754	4.56E-05
5h-naphtho[2,3-a]carbazole-5,13(12h)-dione, 12-phenyl-	mRNA	KIF22	Expression	CellMiner	-	-	-	-	0.39470614	0.0195878	-	-
6-bromo-3-bromomethyl-3,7-dichloro-7-methyl-1-octene	mRNA	KIF22	Expression	CellMiner	-	-	-	-	0.56025236	0.000192693	-	-
6-phenylthio-7h-benzocycloheptene-1,4,7-trione	mRNA	KIF22	Expression	CellMiner	-	-	-	-	0.45829833	0.004578143	-	-
7-benzyl-5,7-dihydro-4h-isoxazolo[5,4-e]isoindole	mRNA	KIF22	Expression	CellMiner	-	-	-	-	0.42806341	0.03103826	-	-
7-epi-10-deacetyltaxol	mRNA	KIF22	Expression	CellMiner	-	-	-	-	-	-	0.36248282	0.048499725
8-hydroxy verrucarin a	mRNA	KIF22	Expression	CellMiner	-	-	-	-	-	-	0.380496422	0.042472053
9-benzyl-6-(benzylthio)-9h-purin-2-amine	mRNA	KIF22	Expression	CellMiner	-	-	-	-	0.40505623	0.03158572	-	-
;(E)-2-(2-(benzo[d][1,3]dioxol-5-yl)vinyl)-5-(3-methyl-1...	mRNA	KIF22	Expression	CellMiner	-	-	-	-	0.39211787	0.0322919	-	-
;(E)-5-chloro-3-((2-methyl-6-phenylimidazo[2,1-b][1,3,4]...	mRNA	KIF22	Expression	CellMiner	-	-	-	-	-0.4221403	0.02688836	-0.39682077	0.04539198
;(E)-5-chloro-3-((6-(4-chlorophenyl)-2-cyclopropylimidaz...	mRNA	KIF22	Expression	CellMiner	-	-	-	-	-0.53341117	0.000297875	-0.428759986	0.009222641
;1,3-diphenyl-4-(3-phenyl-4,5-dihydro-1H-pyrazol-5-yl)-1...	mRNA	KIF22	Expression	CellMiner	-	-	-	-	-0.37073965	0.03266675	-	-
;1-(6-chloro-1H-benzo[d]imidazol-2-yl)-3-(4-methoxypheny...	mRNA	KIF22	Expression	CellMiner	-	-	-	-	-0.51527679	0.000720381	-	-
;2-(3-chloro-4-fluorophenyl)-5-(3-(3,4,5-trimethoxypheny...	mRNA	KIF22	Expression	CellMiner	-	-	-	-	-0.47453767	0.004171917	-	-
;3-[2-(7-azaindol-3-yl)-1,3-thiazol-4-yl)-5-bromo-1-meth...	mRNA	KIF22	Expression	CellMiner	-	-	-	-	-0.44155035	0.03491316	-	-
;5,6-dichloro-2-(3-(4-methoxyphenyl)imidazo[1,5-a]pyridi...	mRNA	KIF22	Expression	CellMiner	-	-	-	-	-0.48887142	0.007219308	-	-
;5-(5,6-dichloro-1H-benzo[d]imidazol-2-yl)-6-(4-fluoroph...	mRNA	KIF22	Expression	CellMiner	-	-	-	-	-0.41405003	0.01753221	-	-
;N-cyclohexyl-4-((1-phenyl-1H-pyrazolo[3,4-d]pyrimidin-4...	mRNA	KIF22	Expression	CellMiner	-	-	-	-	-0.39153126	0.0248996	-	-
[co(me2dtc)2(dee)]clo4	mRNA	KIF22	Expression	CellMiner	-	-	-	-	0.36953245	0.03938328	-	-
achilleol a	mRNA	KIF22	Expression	CellMiner	-	-	-	-	0.44715472	0.02312233	-	-
acridine, 9-phenoxy-	mRNA	KIF22	Expression	CellMiner	-	-	-	-	0.42051184	0.01772937	0.422139473	0.039359989
acridoguanidine	mRNA	KIF22	Expression	CellMiner	-	-	-	-	0.44064255	0.01931643	-	-
adoca	mRNA	KIF22	Expression	CellMiner	-	-	-	-	0.47805663	0.005596443	-	-
AICA Ribonucleotide	mRNA	KIF22	Expression	GDSC	-	-	-	-	-0.19996061	8.56E-09	-0.196117778	1.86E-08
ajoene, trans-	mRNA	KIF22	Expression	CellMiner	-	-	-	-	0.39447998	0.01643313	-	-
AKT inhibitor VIII	mRNA	KIF22	Expression	GDSC	-	-	-	-	-0.20741925	1.86E-09	-0.197748841	1.18E-08
Alectinib	mRNA	KIF22	Expression	GDSC	-	-	-	-	-0.13841009	0.000107871	-0.182198567	1.18E-07
allyl disulfide	mRNA	KIF22	Expression	CellMiner	-	-	-	-	0.37862643	0.02137414	-	-
Amuvatinib	mRNA	KIF22	Expression	GDSC	-	-	-	-	-0.14531536	4.42E-05	-0.205143872	1.68E-09
andrastin a	mRNA	KIF22	Expression	CellMiner	-	-	-	-	0.45882606	0.003538261	-	-
antineoplastic-353527	mRNA	KIF22	Expression	CellMiner	-	-	-	-	0.39719264	0.04043344	-	-
antineoplastic-651590	mRNA	KIF22	Expression	CellMiner	-	-	-	-	0.36642446	0.03408749	-	-
antineoplastic-690271	mRNA	KIF22	Expression	CellMiner	-	-	-	-	0.39250221	0.035688	-	-
AR-42	mRNA	KIF22	Expression	GDSC	-	-	-	-	-0.14661091	2.85E-05	-0.171242751	5.99E-07
artelastin	mRNA	KIF22	Expression	CellMiner	-	-	-	-	0.44882214	0.02139831	-	-
arylmethylene-f	mRNA	KIF22	Expression	CellMiner	-	-	-	-	0.48746665	0.01772845	0.483652688	0.019173116
AS605240	mRNA	KIF22	Expression	GDSC	-	-	-	-	-0.08454906	0.02740836	-0.075690825	0.046685418
AT-7519	mRNA	KIF22	Expression	GDSC	-	-	-	-	-0.18753374	4.13E-08	-0.180445771	1.41E-07
Avagacestat	mRNA	KIF22	Expression	GDSC	-	-	-	-	-0.10758524	0.004701385	-0.092332031	0.01772862
avarol	mRNA	KIF22	Expression	CellMiner	-	-	-	-	0.39569112	0.02590812	-	-
Axitinib	mRNA	KIF22	Expression	GDSC	-	-	-	-	-0.15120061	2.74E-05	-0.144317028	7.47E-05
AZD7762	mRNA	KIF22	Expression	GDSC	-	-	-	-	-0.12173766	0.000835248	-0.13310815	0.000230419
AZD8055	mRNA	KIF22	Expression	GDSC	-	-	-	-	-0.1187528	0.001000556	-0.081800558	0.027308733
baccharinoid a-1 (busam)	mRNA	KIF22	Expression	CellMiner	-	-	-	-	-	-	0.425381741	0.024238784
Belinostat	mRNA	KIF22	Expression	GDSC	-	-	-	-	-0.12634989	0.000447124	-0.155988888	7.36E-06
benzenamine, 4-ethoxy-n-[(4-quinolinyl)methylene]-	mRNA	KIF22	Expression	CellMiner	-	-	-	-	0.4555114	0.005076976	-	-
benzeneamine, 4-[(9-acridinyl)thio]-	mRNA	KIF22	Expression	CellMiner	-	-	-	-	0.35201861	0.03881591	-	-
benzo[1,2-b:4,3-b']dithiophene-4,8-dione, 3,7-bis(acetyl)-	mRNA	KIF22	Expression	CellMiner	-	-	-	-	-	-	0.40545536	0.044563399
benzyl trisulfide	mRNA	KIF22	Expression	CellMiner	-	-	-	-	0.42901266	0.01186547	-	-
berbamine	mRNA	KIF22	Expression	CellMiner	-	-	-	-	0.43221589	0.01046952	-	-
Bicalutamide	mRNA	KIF22	Expression	GDSC	-	-	-	-	-0.08495678	0.02694358	-0.101797533	0.005801303
bipinnatin i	mRNA	KIF22	Expression	CellMiner	-	-	-	-	0.42171601	0.014963	-	-
BIX02189	mRNA	KIF22	Expression	GDSC	-	-	-	-	-0.19647968	6.09E-09	-0.189858961	2.36E-08
Bleomycin (50 uM)	mRNA	KIF22	Expression	GDSC	-	-	-	-	0.22176328	1.44E-10	0.225679192	5.26E-11
BMS-345541	mRNA	KIF22	Expression	GDSC	-	-	-	-	-0.21913832	7.72E-11	-0.184168326	5.02E-08
budmunchiamine a	mRNA	KIF22	Expression	CellMiner	-	-	-	-	0.42275328	0.01679921	-	-
BX-912	mRNA	KIF22	Expression	GDSC	-	-	-	-	-0.19468725	7.90E-09	-0.169148098	6.90E-07
BX795	mRNA	KIF22	Expression	GDSC	-	-	-	-	-0.08261815	0.03475722	-	-
c35h43n5o	mRNA	KIF22	Expression	CellMiner	-	-	-	-	0.39500735	0.02333977	-	-
Cabozantinib	mRNA	KIF22	Expression	GDSC	-	-	-	-	-0.09761078	0.009670621	-0.096230625	0.012386122
calcein am	mRNA	KIF22	Expression	CellMiner	-	-	-	-	0.37201681	0.03879806	0.386476392	0.030903637
caracemide	mRNA	KIF22	Expression	CellMiner	-	-	-	-	0.36545119	0.03067464	-	-
carboxymethyl ethylxanthate	mRNA	KIF22	Expression	CellMiner	-	-	-	-	0.46425745	0.006374931	-	-
CAY10603	mRNA	KIF22	Expression	GDSC	-	-	-	-	-0.14264826	4.74E-05	-0.168539996	8.81E-07
CCT007093	mRNA	KIF22	Expression	GDSC	-	-	-	-	-0.08883338	0.03252616	-	-
Cetuximab	mRNA	KIF22	Expression	GDSC	-	-	-	-	0.11325031	0.003770914	-	-
Chelerythrine	mRNA	KIF22	Expression	CellMiner	-	-	-	-	0.37555925	0.03639553	-	-
chlorobisoximatobismuth(iii)-dihydrochloride	mRNA	KIF22	Expression	CellMiner	-	-	-	-	0.40789137	0.01499441	-	-
chlorotris(chinoline-8-olato)titanium(iv)-trihydrochloride	mRNA	KIF22	Expression	CellMiner	-	-	-	-	0.43474823	0.01306895	0.421379168	0.018014442
CI-1040	mRNA	KIF22	Expression	GDSC	-	-	-	-	0.13781466	0.000220438	0.150648303	5.38E-05
cirensenoxide g	mRNA	KIF22	Expression	CellMiner	-	-	-	-	0.55697719	0.000120358	-	-
cis-amminedichloro(4-methoxyphenethylamine)platinum(ii)	mRNA	KIF22	Expression	CellMiner	-	-	-	-	0.38601174	0.02556004	-	-
cordifene	mRNA	KIF22	Expression	CellMiner	-	-	-	-	0.41917166	0.04454807	0.412810004	0.04345153
CP466722	mRNA	KIF22	Expression	GDSC	-	-	-	-	-0.19227106	1.79E-08	-0.188352839	3.53E-08
CP724714	mRNA	KIF22	Expression	GDSC	-	-	-	-	-0.1039208	0.008218964	-0.115847112	0.001829113
crassin cinnamate	mRNA	KIF22	Expression	CellMiner	-	-	-	-	0.53802043	0.000409536	0.492962251	0.01108886
CUDC-101	mRNA	KIF22	Expression	GDSC	-	-	-	-	-0.13921378	9.15E-05	-0.157835186	6.58E-06
CX-5461	mRNA	KIF22	Expression	GDSC	-	-	-	-	-0.16647777	1.19E-06	-0.155177917	6.46E-06
cyclo(-(r)-b2hphe-d-pro-lys-phe)	mRNA	KIF22	Expression	CellMiner	-	-	-	-	0.48083909	0.004510499	-	-
Dabrafenib	mRNA	KIF22	Expression	GDSC	-	-	-	-	0.17239124	1.54E-06	0.110680073	0.003667484
Dacinostat	mRNA	KIF22	Expression	GDSC	-	-	-	-	-0.1350513	0.000231603	-0.137362358	0.000141463
dalbergione	mRNA	KIF22	Expression	CellMiner	-	-	-	-	0.41452392	0.01293005	-	-
Daporinad	mRNA	KIF22	Expression	GDSC	-	-	-	-	-0.17328794	4.12E-07	-0.198018975	4.75E-09
deoxyuridine	mRNA	KIF22	Expression	CellMiner	-	-	-	-	0.49057289	0.001922765	-	-
digitonin	mRNA	KIF22	Expression	CellMiner	-	-	-	-	0.3684797	0.04220033	-	-
diisopropoxybis(chinoline-8-olato)titanium(iv)	mRNA	KIF22	Expression	CellMiner	-	-	-	-	0.41033537	0.01314954	-	-
Dimethylaminoparthenolide	mRNA	KIF22	Expression	CellMiner	-	-	-	-	0.39305959	0.04751073	-	-
ditercalinium dimethanesulfonate dimethanesulfonate	mRNA	KIF22	Expression	CellMiner	-	-	-	-	0.52698142	0.00438868	-	-
Docetaxel	mRNA	KIF22	Expression	GDSC	-	-	-	-	0.119984	0.000775095	0.142940908	4.74E-05
dthyd	mRNA	KIF22	Expression	CellMiner	-	-	-	-	0.42743784	0.03028115	-	-
duramycin	mRNA	KIF22	Expression	CellMiner	-	-	-	-	0.44498633	0.01912908	-	-
EHT-1864	mRNA	KIF22	Expression	GDSC	-	-	-	-	-0.10334961	0.006378161	-0.097739318	0.008922169
ellipticine, 6-(3-aminopropyl)-, dihydrochloride	mRNA	KIF22	Expression	CellMiner	-	-	-	-	0.4354327	0.01589034	0.432227409	0.027252803
emetine	mRNA	KIF22	Expression	CellMiner	-	-	-	-	-	-	0.488627681	0.01808133
Enzastaurin	mRNA	KIF22	Expression	GDSC	-	-	-	-	-0.11785284	0.001831913	-0.105772944	0.00518352
eremantholide c	mRNA	KIF22	Expression	CellMiner	-	-	-	-	0.45085053	0.02159566	0.467876398	0.009218198
eriolangin	mRNA	KIF22	Expression	CellMiner	-	-	-	-	0.38872169	0.0223435	-	-
ethoxycurcumin trithiadiazolaminomethylcarbonte	mRNA	KIF22	Expression	CellMiner	-	-	-	-	0.37405797	0.03012678	-	-
ethoxytris(2-methyl-8-chinolineolato)titanium(iv)	mRNA	KIF22	Expression	CellMiner	-	-	-	-	-	-	0.39009628	0.039314784
Etoposide	mRNA	KIF22	Expression	GDSC	-	-	-	-	-0.08482095	0.03872991	-	-
euchrysine	mRNA	KIF22	Expression	CellMiner	-	-	-	-	0.37657072	0.03863725	0.41159062	0.023672205
Fedratinib	mRNA	KIF22	Expression	GDSC	-	-	-	-	-0.19114973	1.97E-08	-0.184801455	6.44E-08
Fenretinide	mRNA	KIF22	Expression	CellMiner	-	-	-	-	0.41507777	0.02171131	-	-
fiau	mRNA	KIF22	Expression	CellMiner	-	-	-	-	0.4850188	0.008164848	-	-
flavofungin	mRNA	KIF22	Expression	CellMiner	-	-	-	-	0.44395034	0.01037883	0.37607983	0.044225077
Foretinib	mRNA	KIF22	Expression	GDSC	-	-	-	-	-	-	-0.088643513	0.023337277
FR-180204	mRNA	KIF22	Expression	GDSC	-	-	-	-	-0.12924963	0.000269091	-0.136408387	0.00011672
gab-geldanamycin	mRNA	KIF22	Expression	CellMiner	-	-	-	-	0.3636597	0.03289749	-	-
Genentech Cpd 10	mRNA	KIF22	Expression	GDSC	-	-	-	-	-0.187461	4.81E-08	-0.17262198	6.37E-07
GSK1070916	mRNA	KIF22	Expression	GDSC	-	-	-	-	-0.2443253	2.33E-13	-0.206421637	9.14E-10
gsk237701a	mRNA	KIF22	Expression	CellMiner	-	-	-	-	0.4724257	0.02756072	0.442585598	0.022859165
gsk317314a	mRNA	KIF22	Expression	CellMiner	-	-	-	-	0.437931	0.03305479	0.387806709	0.042762032
GSK429286A	mRNA	KIF22	Expression	GDSC	-	-	-	-	-0.1804983	1.10E-07	-0.176746925	1.87E-07
gsk571989a	mRNA	KIF22	Expression	CellMiner	-	-	-	-	-	-	0.402631506	0.044870387
GSK690693	mRNA	KIF22	Expression	GDSC	-	-	-	-	-0.2350733	2.76E-12	-0.233840573	4.74E-12
GW-2580	mRNA	KIF22	Expression	GDSC	-	-	-	-	-0.1514363	2.01E-05	-0.172960036	6.48E-07
gw559768x	mRNA	KIF22	Expression	CellMiner	-	-	-	-	-	-	-0.432139467	0.047624371
gw811168x	mRNA	KIF22	Expression	CellMiner	-	-	-	-	-0.4567307	0.02639573	-0.503550959	0.028615703
hemolysin bl proteins	mRNA	KIF22	Expression	CellMiner	-	-	-	-	-0.400922	0.02911123	-	-
hydroxybenzoestra-1,3,5(10),16-tetraen-3-ol	mRNA	KIF22	Expression	CellMiner	-	-	-	-	0.4268332	0.01362446	0.397640119	0.044316024
I-BET-762	mRNA	KIF22	Expression	GDSC	-	-	-	-	-0.2045148	1.05E-09	-0.183808422	5.29E-08
Idelalisib	mRNA	KIF22	Expression	GDSC	-	-	-	-	-0.1476984	2.07E-05	-0.146406094	3.16E-05
Idoxuridine	mRNA	KIF22	Expression	CellMiner	-	-	-	-	0.4841228	0.005090389	-	-
imidazole-5-one deri.	mRNA	KIF22	Expression	CellMiner	-	-	-	-	0.4824711	0.003083551	-	-
indophenol, 2,6-dibromo-, monosodium salt	mRNA	KIF22	Expression	CellMiner	-	-	-	-	0.3654484	0.0398836	-	-
Inosine dialdehyde	mRNA	KIF22	Expression	CellMiner	-	-	-	-	0.3636172	0.03851201	-	-
IOX2	mRNA	KIF22	Expression	GDSC	-	-	-	-	-	-	-0.092412478	0.01757286
IPA-3	mRNA	KIF22	Expression	GDSC	-	-	-	-	-0.08402315	0.02253564	-	-
Irinotecan	mRNA	KIF22	Expression	CCLE	-	-	-	-	-	-	-0.356922923	3.32E-08
isopinnatal	mRNA	KIF22	Expression	CellMiner	-	-	-	-	0.4481413	0.01604809	-	-
isopropyl 4-[2-[4-bromo-2,5-dihydroxyphenyl]ethyl]benzoate	mRNA	KIF22	Expression	CellMiner	-	-	-	-	0.3924635	0.04816614	-	-
isostrychnopentamine a trihydrochloride	mRNA	KIF22	Expression	CellMiner	-	-	-	-	0.4719973	0.004446512	-	-
isovelleral	mRNA	KIF22	Expression	CellMiner	-	-	-	-	0.361835	0.03687677	-	-
Ispinesib Mesylate	mRNA	KIF22	Expression	GDSC	-	-	-	-	-0.1607135	3.20E-06	-0.167989935	1.01E-06
JQ1	mRNA	KIF22	Expression	GDSC	-	-	-	-	-0.09161993	0.01299284	-0.080990654	0.030397589
JW-7-24-1	mRNA	KIF22	Expression	GDSC	-	-	-	-	-0.1840509	7.74E-08	-0.178520229	1.91E-07
kauranol	mRNA	KIF22	Expression	CellMiner	-	-	-	-	0.4313274	0.013836	-	-
KIN001-236	mRNA	KIF22	Expression	GDSC	-	-	-	-	-0.195856	6.01E-09	-0.185588673	4.24E-08
KIN001-244	mRNA	KIF22	Expression	GDSC	-	-	-	-	-0.1569072	5.67E-06	-0.13502711	9.84E-05
KIN001-260	mRNA	KIF22	Expression	GDSC	-	-	-	-	-0.1796208	9.17E-08	-0.193847877	7.11E-09
KIN001-266	mRNA	KIF22	Expression	GDSC	-	-	-	-	-0.08362914	0.02629793	-0.087987616	0.015619507
KIN001-270	mRNA	KIF22	Expression	GDSC	-	-	-	-	-0.2083312	6.63E-10	-0.201063991	2.88E-09
KU-55933	mRNA	KIF22	Expression	GDSC	-	-	-	-	-0.1335614	0.000228065	-0.108388632	0.003756635
L-685458	mRNA	KIF22	Expression	CCLE	-	-	-	-	-0.1975179	0.003988396	-0.273601057	2.17E-05
landomycin e	mRNA	KIF22	Expression	CellMiner	-	-	-	-	0.355891	0.03952767	-	-
lapachol	mRNA	KIF22	Expression	CellMiner	-	-	-	-	0.3848114	0.04841356	-	-
Lenalidomide	mRNA	KIF22	Expression	GDSC	-	-	-	-	-0.2071398	1.62E-09	-0.202692912	4.15E-09
light orange r	mRNA	KIF22	Expression	CellMiner	-	-	-	-	-	-	0.488495795	0.026167718
Linifanib	mRNA	KIF22	Expression	GDSC	-	-	-	-	-0.0874574	0.01839268	-0.10991413	0.002329277
longikaurin b	mRNA	KIF22	Expression	CellMiner	-	-	-	-	0.4007175	0.01534708	-	-
Masitinib	mRNA	KIF22	Expression	GDSC	-	-	-	-	-0.1790852	1.69E-07	-0.175116503	3.00E-07
melicopidine	mRNA	KIF22	Expression	CellMiner	-	-	-	-	0.458781	0.01311258	0.449863144	0.011875868
Mercuric Chloride	mRNA	KIF22	Expression	CellMiner	-	-	-	-	0.4134704	0.01669526	-	-
mercury, (p-dioxane-2,5-diyldimethylene)bis[(octanoyloxy)-	mRNA	KIF22	Expression	CellMiner	-	-	-	-	0.3498406	0.0475441	-	-
Methotrexate	mRNA	KIF22	Expression	GDSC	-	-	-	-	-0.1823777	6.38E-08	-0.17112901	4.75E-07
methyl 4-[2-[4-bromo-2,5-dihydroxyphenyl]ethyl]benzoate	mRNA	KIF22	Expression	CellMiner	-	-	-	-	0.4459129	0.005924176	-	-
methylundecylpiperidine, trans	mRNA	KIF22	Expression	CellMiner	-	-	-	-	0.3952445	0.01387239	-	-
mikamycin, b grade	mRNA	KIF22	Expression	CellMiner	-	-	-	-	0.387316	0.02714764	-	-
miliusane b	mRNA	KIF22	Expression	CellMiner	-	-	-	-	0.4369741	0.01520702	-	-
mimuscopic acid	mRNA	KIF22	Expression	CellMiner	-	-	-	-	0.4256569	0.04735628	-	-
MK-2206	mRNA	KIF22	Expression	GDSC	-	-	-	-	-0.1127601	0.01019663	-	-
MPS-1-IN-1	mRNA	KIF22	Expression	GDSC	-	-	-	-	-0.1351674	0.00010315	-0.145660323	2.38E-05
myristoyl hydroxamate	mRNA	KIF22	Expression	CellMiner	-	-	-	-	0.4171255	0.01489014	-	-
n,n'-di-9-acridinyl-1,6-hexanediamine	mRNA	KIF22	Expression	CellMiner	-	-	-	-	-	-	0.416992011	0.047855057
n-acetylsulfanilyl chloride	mRNA	KIF22	Expression	CellMiner	-	-	-	-	-0.3968792	0.02537741	-0.410404628	0.027103674
n1-(4-hydroxy-1,2-butadien-1-yl)-cytosine (cytallene)	mRNA	KIF22	Expression	CellMiner	-	-	-	-	0.4937622	0.001373588	-	-
Navitoclax	mRNA	KIF22	Expression	GDSC	-	-	-	-	-0.2673759	8.84E-16	-0.232534322	8.53E-12
Nelarabine	mRNA	KIF22	Expression	CellMiner	-	-	-	-	0.4646578	0.006169785	-	-
neolan yellow be	mRNA	KIF22	Expression	CellMiner	-	-	-	-	0.4582104	0.009849346	-	-
neplanocin a	mRNA	KIF22	Expression	CellMiner	-	-	-	-	0.4079858	0.02014515	-	-
NG-25	mRNA	KIF22	Expression	GDSC	-	-	-	-	-0.1619479	2.17E-06	-0.139316044	5.61E-05
nogarene	mRNA	KIF22	Expression	CellMiner	-	-	-	-	0.3662676	0.03570284	-	-
NPK76-II-72-1	mRNA	KIF22	Expression	GDSC	-	-	-	-	-0.2547578	1.37E-14	-0.251689488	3.00E-14
nsc 234214	mRNA	KIF22	Expression	CellMiner	-	-	-	-	0.4412308	0.006797461	-	-
nsc 708782 incorporated in micelles, 0.45% (w/w) of drug	mRNA	KIF22	Expression	CellMiner	-	-	-	-	0.4358555	0.0322978	-	-
NSC-207895	mRNA	KIF22	Expression	GDSC	-	-	-	-	-0.1514408	2.16E-05	-0.158068549	8.47E-06
NSC-87877	mRNA	KIF22	Expression	GDSC	-	-	-	-	-	-	-0.086258822	0.025825355
Nutlin-3a (-)	mRNA	KIF22	Expression	GDSC	-	-	-	-	0.09169116	0.01424943	0.084893939	0.023636857
NVP-BHG712	mRNA	KIF22	Expression	GDSC	-	-	-	-	-0.1218898	0.000451337	-0.096931281	0.005756405
o-Aminoazotoluene	mRNA	KIF22	Expression	CellMiner	-	-	-	-	0.4367273	0.01872051	-	-
o-bromo-.alpha.-benzoyl cinnamonitrile	mRNA	KIF22	Expression	CellMiner	-	-	-	-	0.3789085	0.03674211	-	-
ochraceolide a	mRNA	KIF22	Expression	CellMiner	-	-	-	-	0.4464887	0.004100834	-	-
Omipalisib	mRNA	KIF22	Expression	GDSC	-	-	-	-	-0.141502	8.45E-05	-0.119855057	0.001156372
oncocalyxone a	mRNA	KIF22	Expression	CellMiner	-	-	-	-	0.4103125	0.0175247	-	-
OSI-027	mRNA	KIF22	Expression	GDSC	-	-	-	-	-0.1748111	4.18E-07	-0.173798373	4.56E-07
OSI-930	mRNA	KIF22	Expression	GDSC	-	-	-	-	-0.1675577	8.79E-07	-0.17296264	3.74E-07
oxin	mRNA	KIF22	Expression	CellMiner	-	-	-	-	0.391218	0.02133604	-	-
PAC-1	mRNA	KIF22	Expression	GDSC	-	-	-	-	-0.1369931	0.000104313	-0.122827675	0.000554195
Paclitaxel	mRNA	KIF22	Expression	CCLE	-	-	-	-	-	-	-0.237582961	0.001159346
Panobinostat	mRNA	KIF22	Expression	CCLE	-	-	-	-	-0.2863242	3.45E-05	-0.375592828	1.25E-09
PD-0332991	mRNA	KIF22	Expression	CCLE	-	-	-	-	-0.2896967	1.43E-05	-0.278767203	1.97E-05
PD0325901	mRNA	KIF22	Expression	GDSC	-	-	-	-	0.2292205	2.45E-11	0.242353423	1.01E-12
PD173074	mRNA	KIF22	Expression	GDSC	-	-	-	-	-0.1020985	0.007030886	-0.097087257	0.009149566
Pelitinib	mRNA	KIF22	Expression	GDSC	-	-	-	-	-0.1265819	0.000533316	-0.123458736	0.000734872
perfluorobenzophenone	mRNA	KIF22	Expression	CellMiner	-	-	-	-	0.4348354	0.008186183	-	-
PF2341066	mRNA	KIF22	Expression	CCLE	-	-	-	-	-0.1731601	0.01621766	-0.232970542	0.000577373
PFI-3	mRNA	KIF22	Expression	GDSC	-	-	-	-	-0.1119249	0.00158276	-0.136165131	8.62E-05
PHA-793887	mRNA	KIF22	Expression	GDSC	-	-	-	-	-0.1888035	2.34E-08	-0.193250988	1.10E-08
phenazine di-n-oxide	mRNA	KIF22	Expression	CellMiner	-	-	-	-	0.515696	0.000794438	-	-
Phenformin	mRNA	KIF22	Expression	GDSC	-	-	-	-	-0.1248969	0.000486727	-0.123531542	0.000507178
phomopsolide e	mRNA	KIF22	Expression	CellMiner	-	-	-	-	0.459567	0.0104498	-	-
PI-103	mRNA	KIF22	Expression	GDSC	-	-	-	-	-0.160924	3.23E-06	-0.152255744	1.14E-05
PIK-93	mRNA	KIF22	Expression	GDSC	-	-	-	-	-0.1862099	3.89E-08	-0.172361561	4.41E-07
PLX-4720	mRNA	KIF22	Expression	GDSC	-	-	-	-	0.08006916	0.04536104	-	-
pmp (van)	mRNA	KIF22	Expression	CellMiner	-	-	-	-	0.3565129	0.04568452	-	-
Ponatinib	mRNA	KIF22	Expression	GDSC	-	-	-	-	-0.08863691	0.01732152	-	-
predorine	mRNA	KIF22	Expression	CellMiner	-	-	-	-	0.3619573	0.04169217	-	-
propanedinitrile, 2-(phenylmethyl)thio-	mRNA	KIF22	Expression	CellMiner	-	-	-	-	0.4027931	0.01625985	-	-
propanethioamide, n-hydroxy-n-methyl-	mRNA	KIF22	Expression	CellMiner	-	-	-	-	0.4009658	0.01510471	0.376774947	0.034564325
propanoic acid, 2-methyl-2-[4-(1-naphthalenyl)phenoxy]-	mRNA	KIF22	Expression	CellMiner	-	-	-	-	0.4386521	0.01156374	-	-
propiophenone, 3-phenyl-3-piperidino-	mRNA	KIF22	Expression	CellMiner	-	-	-	-	0.4726308	0.003315339	-	-
prototryptochrome, iodo-	mRNA	KIF22	Expression	CellMiner	-	-	-	-	0.4739857	0.00891624	-	-
ptmc	mRNA	KIF22	Expression	CellMiner	-	-	-	-	-	-	0.394380599	0.036806291
QL-X-138	mRNA	KIF22	Expression	GDSC	-	-	-	-	-0.1943752	1.55E-08	-0.18677222	6.26E-08
QL-XI-92	mRNA	KIF22	Expression	GDSC	-	-	-	-	-0.1922823	1.30E-08	-0.17872394	1.55E-07
QL-XII-47	mRNA	KIF22	Expression	GDSC	-	-	-	-	-0.1343488	0.000251747	-0.120740741	0.000959836
QS11	mRNA	KIF22	Expression	GDSC	-	-	-	-	-0.1188719	0.001502809	-0.106090682	0.004684823
Quizartinib	mRNA	KIF22	Expression	GDSC	-	-	-	-	-0.1733695	4.24E-07	-0.208005616	6.26E-10
Refametinib	mRNA	KIF22	Expression	GDSC	-	-	-	-	0.2866645	1.14E-17	0.304133185	5.70E-20
rifocin	mRNA	KIF22	Expression	CellMiner	-	-	-	-	0.3876634	0.02006098	-	-
roseophilin, hcl salt	mRNA	KIF22	Expression	CellMiner	-	-	-	-	0.429298	0.01238024	0.40362539	0.023986052
rustaiyan a	mRNA	KIF22	Expression	CellMiner	-	-	-	-	0.3628769	0.03813204	-	-
rutacridone epoxide	mRNA	KIF22	Expression	CellMiner	-	-	-	-	0.4112061	0.015551	-	-
Ruxolitinib	mRNA	KIF22	Expression	GDSC	-	-	-	-	-0.1622604	2.35E-06	-0.16371818	1.62E-06
s-decyl p-toluenethiosulfonate	mRNA	KIF22	Expression	CellMiner	-	-	-	-	0.390059	0.0399424	-	-
sanguilutine pseudobase	mRNA	KIF22	Expression	CellMiner	-	-	-	-	0.4194388	0.01905324	-	-
santalin	mRNA	KIF22	Expression	CellMiner	-	-	-	-	0.3958897	0.02590076	-	-
SB505124	mRNA	KIF22	Expression	GDSC	-	-	-	-	-	-	-0.086890991	0.018935749
SB52334	mRNA	KIF22	Expression	GDSC	-	-	-	-	-0.09309148	0.0110628	-0.126212015	0.00036014
Selisistat	mRNA	KIF22	Expression	GDSC	-	-	-	-	-0.1791652	1.85E-07	-0.182505795	8.62E-08
sellowin a	mRNA	KIF22	Expression	CellMiner	-	-	-	-	0.3974691	0.03993239	-	-
Selumetinib	mRNA	KIF22	Expression	GDSC	-	-	-	-	0.274682	6.91E-16	0.270528681	1.65E-15
sempervirine, nitrate, dihydrate	mRNA	KIF22	Expression	CellMiner	-	-	-	-	-	-	0.46996874	0.007444631
septacidin	mRNA	KIF22	Expression	CellMiner	-	-	-	-	-0.4435039	0.0443157	-	-
SGC0946	mRNA	KIF22	Expression	GDSC	-	-	-	-	-0.1225711	0.000561077	-0.140986151	5.53E-05
shikoccin	mRNA	KIF22	Expression	CellMiner	-	-	-	-	0.4063916	0.01737527	-	-
sinulariolide	mRNA	KIF22	Expression	CellMiner	-	-	-	-	0.4034328	0.04221683	-	-
SL0101	mRNA	KIF22	Expression	GDSC	-	-	-	-	-0.08679021	0.02237341	-0.075835567	0.049357891
SNX-2112	mRNA	KIF22	Expression	GDSC	-	-	-	-	-0.1145965	0.001198924	-0.126601874	0.000287043
Sorafenib	mRNA	KIF22	Expression	CCLE	-	-	-	-	-	-	-0.181839836	0.011746009
stereoisomer of nsc 674067-p	mRNA	KIF22	Expression	CellMiner	-	-	-	-	0.3453763	0.04524246	-	-
STF-62247	mRNA	KIF22	Expression	GDSC	-	-	-	-	-0.1732475	3.89E-07	-0.160992345	2.48E-06
stilbene, 4-hydroxy-4'-methoxy-, (z)-	mRNA	KIF22	Expression	CellMiner	-	-	-	-	0.41711	0.01661007	-	-
streptorubrin	mRNA	KIF22	Expression	CellMiner	-	-	-	-	0.4958623	0.008092582	0.445815272	0.024406834
suavedol	mRNA	KIF22	Expression	CellMiner	-	-	-	-	0.4779326	0.01793917	-	-
T0901317	mRNA	KIF22	Expression	GDSC	-	-	-	-	-0.2171082	8.70E-11	-0.217194492	8.15E-11
TAE684	mRNA	KIF22	Expression	CCLE	-	-	-	-	-	-	-0.183107916	0.014863414
TAK-715	mRNA	KIF22	Expression	GDSC	-	-	-	-	-0.2271706	1.19E-11	-0.216077667	1.16E-10
Tamoxifen	mRNA	KIF22	Expression	GDSC	-	-	-	-	-0.1057785	0.003230466	-0.130742639	0.000210658
Tanespimycin	mRNA	KIF22	Expression	GDSC	-	-	-	-	0.2041034	1.90E-09	0.218271619	9.87E-11
Temozolomide	mRNA	KIF22	Expression	GDSC	-	-	-	-	-0.1125106	0.001537321	-0.158429761	4.93E-06
tetra(n-methyl-2-pyridyl)-porphyrin chloride	mRNA	KIF22	Expression	CellMiner	-	-	-	-	0.3946111	0.0333283	-	-
tetracarboxyphthalocyanine-gadolinium	mRNA	KIF22	Expression	CellMiner	-	-	-	-	0.4748446	0.008328674	-	-
tetrakis(8-chinolineolato)titanium(iv)-tetrahydrochloride	mRNA	KIF22	Expression	CellMiner	-	-	-	-	0.4005146	0.02573881	-	-
thioperoxydicarbonic diamide, tetramethyl-	mRNA	KIF22	Expression	CellMiner	-	-	-	-	0.3935686	0.01532872	0.362387108	0.032436442
thymophthalein	mRNA	KIF22	Expression	CellMiner	-	-	-	-	0.5222772	0.000626523	-	-
THZ-2-102-1	mRNA	KIF22	Expression	GDSC	-	-	-	-	-0.1504022	1.46E-05	-0.159533481	3.33E-06
THZ-2-49	mRNA	KIF22	Expression	GDSC	-	-	-	-	-0.1047275	0.003679641	-0.098998986	0.005712769
Tivozanib	mRNA	KIF22	Expression	GDSC	-	-	-	-	-0.1920432	1.74E-08	-0.197760935	4.95E-09
TKI258	mRNA	KIF22	Expression	CCLE	-	-	-	-	-0.2055127	0.003454149	-0.242812	0.000317343
TL-1-85	mRNA	KIF22	Expression	GDSC	-	-	-	-	-0.1564013	4.65E-06	-0.128728881	0.000190705
TL-2-105	mRNA	KIF22	Expression	GDSC	-	-	-	-	-0.249236	6.98E-14	-0.246041338	1.37E-13
Topotecan	mRNA	KIF22	Expression	CCLE	-	-	-	-	-	-	-0.374983553	5.52E-09
toxifren	mRNA	KIF22	Expression	CellMiner	-	-	-	-	0.5036944	0.003380116	-	-
TPCA-1	mRNA	KIF22	Expression	GDSC	-	-	-	-	-0.1734631	3.35E-07	-0.180267177	1.14E-07
tptc	mRNA	KIF22	Expression	CellMiner	-	-	-	-	0.4349432	0.04871166	0.438658769	0.024310743
Trametinib	mRNA	KIF22	Expression	GDSC	-	-	-	-	0.3261531	5.68E-23	0.335250593	1.64E-24
Tretinoin	mRNA	KIF22	Expression	GDSC	-	-	-	-	-0.1512067	1.79E-05	-0.130022802	0.000318419
Triamcinolone	mRNA	KIF22	Expression	CellMiner	-	-	-	-	0.4060177	0.03919126	-	-
trichlorotris-3-(t-butyl)pyrazoleruthenium(iii)	mRNA	KIF22	Expression	CellMiner	-	-	-	-	0.4180734	0.007615744	-	-
tris(4-biphenylyl)methanol	mRNA	KIF22	Expression	CellMiner	-	-	-	-	0.423136	0.02521228	-	-
trunculin a	mRNA	KIF22	Expression	CellMiner	-	-	-	-	0.3628193	0.04340732	0.355805688	0.048447636
Tubastatin A	mRNA	KIF22	Expression	GDSC	-	-	-	-	-0.1888982	2.01E-08	-0.182230687	6.57E-08
Tyrphostin AG 1478	mRNA	KIF22	Expression	CellMiner	-	-	-	-	-	-	-0.459381352	0.030289842
UNC0638	mRNA	KIF22	Expression	GDSC	-	-	-	-	-0.1101577	0.001775051	-0.116642597	0.000811244
UNC1215	mRNA	KIF22	Expression	GDSC	-	-	-	-	-0.1369009	7.33E-05	-0.151039489	1.07E-05
Veliparib	mRNA	KIF22	Expression	GDSC	-	-	-	-	-0.1177776	0.001234078	-0.120082446	0.000882405
vicenistatin	mRNA	KIF22	Expression	CellMiner	-	-	-	-	0.4314618	0.01374134	0.399855499	0.028911492
Vismodegib	mRNA	KIF22	Expression	GDSC	-	-	-	-	-0.1375475	0.000100602	-0.129057638	0.000299842
VNLG/124	mRNA	KIF22	Expression	GDSC	-	-	-	-	-0.1742494	2.99E-07	-0.168606767	7.53E-07
Vorinostat	mRNA	KIF22	Expression	GDSC	-	-	-	-	-0.2303206	7.29E-12	-0.228783165	7.67E-12
VX-702	mRNA	KIF22	Expression	GDSC	-	-	-	-	-0.1415296	5.02E-05	-0.133127878	0.000133455
WHI-P97	mRNA	KIF22	Expression	GDSC	-	-	-	-	-0.08942871	0.02511205	-0.119567744	0.001544271
withafastuosin d diacetate	mRNA	KIF22	Expression	CellMiner	-	-	-	-	0.4054393	0.01301056	-	-
WZ3105	mRNA	KIF22	Expression	GDSC	-	-	-	-	-0.1850284	6.38E-08	-0.180058676	1.34E-07
XMD13-2	mRNA	KIF22	Expression	GDSC	-	-	-	-	-0.2050734	1.09E-09	-0.202049455	2.02E-09
XMD14-99	mRNA	KIF22	Expression	GDSC	-	-	-	-	-0.155382	4.80E-06	-0.163703989	1.41E-06
XMD15-27	mRNA	KIF22	Expression	GDSC	-	-	-	-	-0.1535431	7.96E-06	-0.132416645	0.000130543
Y-39983	mRNA	KIF22	Expression	GDSC	-	-	-	-	-0.1449589	2.56E-05	-0.143505413	3.21E-05
YM201636	mRNA	KIF22	Expression	GDSC	-	-	-	-	-0.1798086	1.46E-07	-0.192867086	1.37E-08
Zibotentan	mRNA	KIF22	Expression	GDSC	-	-	-	-	-0.2177286	1.06E-10	-0.19139613	1.65E-08
ZSTK474	mRNA	KIF22	Expression	GDSC	-	-	-	-	-0.1836424	1.10E-07	-0.164620194	3.21E-06
zuihonin a	mRNA	KIF22	Expression	CellMiner	-	-	-	-	0.4504846	0.01519615	0.430338537	0.023936366
5,6-ethylenediquino[3,2-b	mRNA	KIF22	Methylation	CellMiner	-	-	-	-	-	-	-0.287517416	0.048079641
6-CHLORO-2-METHOXY-9-[(5-PIPERIDINOPENTYL)AMINO]ACRIDINE	mRNA	KIF22	Methylation	CellMiner	-	-	-	-	-	-	0.405949888	0.009351895
;(E)-3-(3-((1-(4-fluorobenzyl)-1H-1,2,3-triazol-4-yl)met...	mRNA	KIF22	Methylation	CellMiner	-	-	-	-	0.4540484	0.004871193	-	-
;(E)-3-(4-methoxy-3-((1-(4-methoxybenzyl)-1H-1,2,3-triaz...	mRNA	KIF22	Methylation	CellMiner	-	-	-	-	0.4009555	0.03592149	-	-
[co(me2dtc)2(dee)]clo4	mRNA	KIF22	Methylation	CellMiner	-	-	-	-	-	-	-0.372400366	0.039543759
adiantifoline	mRNA	KIF22	Methylation	CellMiner	-	-	-	-	-0.3897753	0.01197397	-	-
alsterpaullone	mRNA	KIF22	Methylation	CellMiner	-	-	-	-	0.3283038	0.03172537	0.320258987	0.0431045
AZD6482	mRNA	KIF22	Methylation	GDSC	-	-	-	-	-	-	0.098587485	0.019649103
Bafetinib	mRNA	KIF22	Methylation	CellMiner	-	-	-	-	-0.361041	0.01680275	-0.356254604	0.033345296
BX-912	mRNA	KIF22	Methylation	GDSC	-	-	-	-	-0.10793593	0.00238453	-0.081108794	0.02789039
celcot rm	mRNA	KIF22	Methylation	CellMiner	-	-	-	-	-0.3320261	0.04691431	-	-
CP466722	mRNA	KIF22	Methylation	GDSC	-	-	-	-	-0.07288504	0.04842427	-	-
crotoxin cd	mRNA	KIF22	Methylation	CellMiner	-	-	-	-	-0.4123399	0.0156419	-0.418540029	0.010423906
CUDC-101	mRNA	KIF22	Methylation	GDSC	-	-	-	-	-0.08061118	0.03550916	-	-
curromycin a.b mixture	mRNA	KIF22	Methylation	CellMiner	-	-	-	-	-	-	-0.342564162	0.034916443
CX-5461	mRNA	KIF22	Methylation	GDSC	-	-	-	-	-0.0936091	0.01021771	-0.07642973	0.042499355
Dabrafenib	mRNA	KIF22	Methylation	GDSC	-	-	-	-	0.12612662	0.00095022	0.092115815	0.023589371
DMOG	mRNA	KIF22	Methylation	GDSC	-	-	-	-	-0.08664014	0.02490026	-0.079731094	0.043159198
Foretinib	mRNA	KIF22	Methylation	GDSC	-	-	-	-	-	-	-0.07754475	0.048243838
GSK1070916	mRNA	KIF22	Methylation	GDSC	-	-	-	-	-0.1219915	0.000547645	-0.083169762	0.025921309
Hypothemycin	mRNA	KIF22	Methylation	CellMiner	-	-	-	-	-0.3931863	0.02133079	-	-
IPA-3	mRNA	KIF22	Methylation	GDSC	-	-	-	-	-0.09279736	0.01177906	-0.081318396	0.030145605
iridogermanal	mRNA	KIF22	Methylation	CellMiner	-	-	-	-	-0.3695187	0.04474461	-	-
Methotrexate	mRNA	KIF22	Methylation	GDSC	-	-	-	-	-0.08027463	0.02649151	-	-
MPS-1-IN-1	mRNA	KIF22	Methylation	GDSC	-	-	-	-	-0.08596524	0.02245071	-	-
n-(p-styrylphenyl)acetohydroxamic acid	mRNA	KIF22	Methylation	CellMiner	-	-	-	-	0.329998	0.02967687	-	-
Nilotinib	mRNA	KIF22	Methylation	CellMiner	-	-	-	-	-0.3681963	0.03291482	-0.428104985	0.024608674
Omipalisib	mRNA	KIF22	Methylation	GDSC	-	-	-	-	-0.0886015	0.01812156	-	-
OSI-027	mRNA	KIF22	Methylation	GDSC	-	-	-	-	-0.08223063	0.02549353	-	-
Palbociclib	mRNA	KIF22	Methylation	GDSC	-	-	-	-	-0.08486894	0.03675386	-	-
Panobinostat	mRNA	KIF22	Methylation	CCLE	-	-	-	-	0.1678963	0.0454483	-	-
PD-98059	mRNA	KIF22	Methylation	CellMiner	-	-	-	-	-	-	-0.33379689	0.042852612
Pelitinib	mRNA	KIF22	Methylation	GDSC	-	-	-	-	-	-	-0.08344767	0.022290162
PHA-793887	mRNA	KIF22	Methylation	GDSC	-	-	-	-	-0.07830671	0.03071024	-	-
PI-103	mRNA	KIF22	Methylation	GDSC	-	-	-	-	-0.0749855	0.04025495	-	-
PLX-4720	mRNA	KIF22	Methylation	GDSC	-	-	-	-	0.1205237	0.001180395	0.109990512	0.003601085
protein toxin a 23 - mw approx. 6700	mRNA	KIF22	Methylation	CellMiner	-	-	-	-	-0.3444292	0.04046177	-0.343212638	0.03365363
protein toxin b 15 - mw approx 6700	mRNA	KIF22	Methylation	CellMiner	-	-	-	-	-	-	-0.376804997	0.027286276
protein toxin c 10 - mw approx. 6700	mRNA	KIF22	Methylation	CellMiner	-	-	-	-	-0.4650942	0.002135895	-0.42754608	0.004709866
protein toxin d 5 - mw approx 6700	mRNA	KIF22	Methylation	CellMiner	-	-	-	-	-0.4284703	0.01205213	-0.456258446	0.007082655
QL-X-138	mRNA	KIF22	Methylation	GDSC	-	-	-	-	-0.08540356	0.01973305	-	-
QL-XI-92	mRNA	KIF22	Methylation	GDSC	-	-	-	-	-0.08111551	0.02549284	-	-
QL-XII-47	mRNA	KIF22	Methylation	GDSC	-	-	-	-	-0.08562307	0.02446292	-0.079950682	0.036524966
sb-610251-b	mRNA	KIF22	Methylation	CellMiner	-	-	-	-	-0.4731861	0.001401993	-0.463614662	0.010399476
STF-62247	mRNA	KIF22	Methylation	GDSC	-	-	-	-	-0.08697265	0.01680479	-	-
Tanespimycin	mRNA	KIF22	Methylation	GDSC	-	-	-	-	0.07903651	0.03639329	0.081124679	0.031274096
TL-2-105	mRNA	KIF22	Methylation	GDSC	-	-	-	-	-0.07601772	0.03808198	-	-
Tubastatin A	mRNA	KIF22	Methylation	GDSC	-	-	-	-	-0.09480919	0.008425737	-	-
TW 37	mRNA	KIF22	Methylation	GDSC	-	-	-	-	0.1049533	0.01447472	0.122605192	0.003480736
zimelidine hydrochloride	mRNA	KIF22	Methylation	CellMiner	-	-	-	-	-	-	-0.387529037	0.020846392
ZSTK474	mRNA	KIF22	Methylation	GDSC	-	-	-	-	-0.08158222	0.02539191	-	-
AZD6244	mRNA	KIF22	Mutation	CCLE	10.61813453	9.10E-21	-	-	-	-	-	-
LBW242	mRNA	KIF22	Mutation	CCLE	4.262755	9.68E-05	-	-	-	-	-	-
Nutlin-3	mRNA	KIF22	Mutation	CCLE	3.910517	0.000201146	-	-	-	-	-	-
PD-0332991	mRNA	KIF22	Mutation	CCLE	7.419571	1.42E-11	-	-	-	-	-	-
PF2341066	mRNA	KIF22	Mutation	CCLE	12.39645	5.23E-26	-	-	-	-	-	-
PHA-665752	mRNA	KIF22	Mutation	CCLE	5.604415	4.51E-07	-	-	-	-	-	-
PLX4720	mRNA	KIF22	Mutation	CCLE	6.033706	2.42E-08	-	-	-	-	-	-
