# Supplementary material for: KIF22 in the Prognosis and Immune Biomarking of Pan-Cancer
Source: Hindawi journal article supplement (doi:10.1155/2023/9542311), 2023-05-31
Supplement: f11 [file 9542311.f11.txt]

Query	Statistic	P-value	FDR (BH)	Event_SD	Event_TD
KIF22	1	1.00E-103	1.00E-99	520	520
C16orf59	0.769637177	5.30E-103	5.35E-99	520	520
CHTF18	0.754013408	1.31E-96	8.80E-93	520	520
SNRPA	0.733637852	5.83E-89	2.94E-85	520	520
AURKB	0.717605138	2.02E-83	8.14E-80	520	520
RNASEH2A	0.714283538	2.54E-82	8.53E-79	520	520
CDT1	0.713424776	4.86E-82	1.40E-78	520	520
TRAIP	0.709931327	6.63E-81	1.67E-77	520	520
INO80E	0.705890413	1.30E-79	2.91E-76	520	520
NASP	0.703197506	9.19E-79	1.85E-75	520	520
PKMYT1	0.700956559	4.60E-78	8.43E-75	520	520
CKS1B	0.693939273	6.47E-76	1.09E-72	520	520
TROAP	0.689112548	1.79E-74	2.78E-71	520	520
MND1	0.686260139	1.24E-73	1.78E-70	520	520
DCTPP1	0.680179693	7.06E-72	9.49E-69	520	520
PIF1	0.678320687	2.38E-71	3.00E-68	520	520
E2F1	0.673481896	5.43E-70	6.44E-67	520	520
HAUS8	0.671496184	1.93E-69	2.16E-66	520	520
RECQL4	0.670248853	4.25E-69	4.51E-66	520	520
C16orf75	0.6684798	1.29E-68	1.30E-65	520	520
GINS2	0.666633169	4.10E-68	3.94E-65	520	520
RAD54L	0.665503969	8.28E-68	7.59E-65	520	520
RNPS1	0.664344869	1.70E-67	1.49E-64	520	520
NUDT1	0.661150686	1.20E-66	1.01E-63	520	520
EME1	0.660435987	1.86E-66	1.50E-63	520	520
UBE2C	0.659670109	2.96E-66	2.30E-63	520	520
C14orf80	0.654893449	5.23E-65	3.91E-62	520	520
UBE2T	0.651176106	4.71E-64	3.39E-61	520	520
CCNB2	0.649657994	1.15E-63	7.97E-61	520	520
KIF2C	0.649422872	1.31E-63	8.84E-61	520	520
WDR34	0.649340031	1.38E-63	8.95E-61	520	520
PHKG2	0.64929003	1.42E-63	8.95E-61	520	520
HIRIP3	0.647234323	4.69E-63	2.86E-60	520	520
DUT	0.646823673	5.94E-63	3.52E-60	520	520
PSMC3IP	0.646689082	6.42E-63	3.70E-60	520	520
TK1	0.645561525	1.23E-62	6.89E-60	520	520
CDC45	0.641672612	1.13E-61	6.17E-59	520	520
CDCA3	0.641211101	1.47E-61	7.80E-59	520	520
SRRT	0.640740071	1.92E-61	9.92E-59	520	520
CENPH	0.6403387	2.41E-61	1.21E-58	520	520
CENPW	0.639717046	3.41E-61	1.68E-58	520	520
PSRC1	0.638333158	7.42E-61	3.56E-58	520	520
RFC4	0.637716323	1.05E-60	4.91E-58	520	520
OIP5	0.637219675	1.38E-60	6.33E-58	520	520
CENPM	0.636491051	2.07E-60	9.29E-58	520	520
BIRC5	0.631780575	2.78E-59	1.22E-56	520	520
GMNN	0.62989555	7.75E-59	3.33E-56	520	520
MCM7	0.627863656	2.32E-58	9.76E-56	520	520
RFC2	0.626765239	4.19E-58	1.73E-55	520	520
CKS2	0.624905164	1.13E-57	4.57E-55	520	520
CDCA5	0.62442579	1.46E-57	5.78E-55	520	520
PTTG1	0.622844534	3.38E-57	1.31E-54	520	520
CCHCR1	0.621481163	6.94E-57	2.64E-54	520	520
RAD51	0.62138936	7.29E-57	2.72E-54	520	520
C19orf48	0.619831421	1.65E-56	6.05E-54	520	520
C17orf53	0.61964439	1.82E-56	6.55E-54	520	520
SNRNP70	0.618608163	3.12E-56	1.11E-53	520	520
POC1A	0.6179799	4.33E-56	1.51E-53	520	520
MYST1	0.6158459	1.31E-55	4.47E-53	520	520
PPIH	0.61580027	1.34E-55	4.50E-53	520	520
ITGB3BP	0.615766865	1.36E-55	4.50E-53	520	520
BCL2L12	0.615137208	1.88E-55	6.12E-53	520	520
SNRPD1	0.614683982	2.38E-55	7.60E-53	520	520
NR2C2AP	0.614306622	2.88E-55	9.08E-53	520	520
SPC25	0.614160464	3.11E-55	9.64E-53	520	520
PCNA	0.613067309	5.44E-55	1.66E-52	520	520
POLD1	0.612482775	7.32E-55	2.20E-52	520	520
DNAJC9	0.611695012	1.09E-54	3.19E-52	520	520
C9orf142	0.611300689	1.34E-54	3.85E-52	520	520
SFRS3	0.610573909	1.93E-54	5.48E-52	520	520
CCDC101	0.610366449	2.14E-54	6.00E-52	520	520
KIFC1	0.610258719	2.26E-54	6.17E-52	520	520
TSEN54	0.610256295	2.27E-54	6.17E-52	520	520
RPA3	0.60859443	5.23E-54	1.41E-51	520	520
CDC25C	0.606167084	1.76E-53	4.68E-51	520	520
UBXN11	0.605515189	2.44E-53	6.38E-51	520	520
POLR3K	0.605482755	2.48E-53	6.40E-51	520	520
C1orf135	0.603517858	6.55E-53	1.67E-50	520	520
FEN1	0.602587071	1.04E-52	2.58E-50	520	520
RCCD1	0.602334534	1.17E-52	2.89E-50	520	520
CHAF1A	0.602144323	1.29E-52	3.13E-50	520	520
SNRNP25	0.602060895	1.34E-52	3.22E-50	520	520
CENPA	0.601150241	2.10E-52	4.98E-50	520	520
NDC80	0.600022791	3.64E-52	8.53E-50	520	520
MAZ	0.599375201	4.98E-52	1.16E-49	520	520
HMGN2	0.599314287	5.13E-52	1.18E-49	520	520
TACC3	0.598669393	7.02E-52	1.59E-49	520	520
GTF3C5	0.598295092	8.42E-52	1.89E-49	520	520
ASF1B	0.597650697	1.15E-51	2.55E-49	520	520
SULT1A3	0.597038572	1.55E-51	3.39E-49	520	520
DSN1	0.596675873	1.84E-51	3.99E-49	520	520
PGP	0.59371467	7.60E-51	1.63E-48	520	520
LIG1	0.593296055	9.28E-51	1.97E-48	520	520
GFER	0.591949206	1.76E-50	3.70E-48	520	520
DTYMK	0.591322082	2.37E-50	4.92E-48	520	520
LSM4	0.590291467	3.85E-50	7.92E-48	520	520
PPIL5	0.590099882	4.21E-50	8.58E-48	520	520
C16orf53	0.589782233	4.89E-50	9.86E-48	520	520
C1orf35	0.589340471	6.02E-50	1.20E-47	520	520
WDR85	0.588580684	8.60E-50	1.68E-47	520	520
FAM54A	0.586101343	2.73E-49	5.29E-47	520	520
SAC3D1	0.585943999	2.94E-49	5.64E-47	520	520
LOC81691	0.584401803	6.00E-49	1.14E-46	520	520
ACYP1	0.584111402	6.86E-49	1.29E-46	520	520
DCI	0.583515468	9.02E-49	1.68E-46	520	520
SIVA1	0.583411019	9.46E-49	1.75E-46	520	520
LOC642846	0.582938909	1.18E-48	2.16E-46	520	520
ZMYND19	0.581208341	2.60E-48	4.72E-46	520	520
SNRPF	0.581087165	2.74E-48	4.94E-46	520	520
THOC6	0.580586786	3.45E-48	6.15E-46	520	520
NUP85	0.580513575	3.56E-48	6.30E-46	520	520
HMGB2	0.580463675	3.64E-48	6.39E-46	520	520
CDC20	0.579189998	6.50E-48	1.13E-45	520	520
TUFM	0.578664938	8.24E-48	1.41E-45	520	520
H2AFZ	0.578197502	1.02E-47	1.73E-45	520	520
COMMD4	0.577879255	1.18E-47	1.98E-45	520	520
MRPL11	0.577524297	1.38E-47	2.30E-45	520	520
LRDD	0.577019313	1.73E-47	2.86E-45	520	520
AZI1	0.57684113	1.88E-47	3.08E-45	520	520
FANCA	0.576481268	2.21E-47	3.59E-45	520	520
ANP32B	0.576428209	2.26E-47	3.64E-45	520	520
UBE2S	0.57627433	2.42E-47	3.87E-45	520	520
C21orf45	0.57612902	2.58E-47	4.10E-45	520	520
CCDC150	0.573974334	6.76E-47	1.05E-44	520	520
C2orf48	0.573599519	7.99E-47	1.23E-44	520	509
MCM5	0.572440014	1.34E-46	2.04E-44	520	520
SAFB	0.57118717	2.33E-46	3.53E-44	520	520
SUV39H1	0.570523358	3.11E-46	4.69E-44	520	520
RAD9A	0.570413319	3.27E-46	4.86E-44	520	520
MAGOH	0.570408058	3.28E-46	4.86E-44	520	520
WRAP53	0.56933234	5.25E-46	7.73E-44	520	520
NUF2	0.568288565	8.29E-46	1.19E-43	520	520
XRCC3	0.567259877	1.30E-45	1.86E-43	520	520
VRK1	0.56713169	1.37E-45	1.95E-43	520	520
MRPL38	0.567048014	1.42E-45	2.01E-43	520	520
BAT1	0.56646049	1.84E-45	2.57E-43	520	520
WDR90	0.566143907	2.11E-45	2.93E-43	520	520
STMN1	0.565989868	2.25E-45	3.09E-43	520	520
CDK1	0.565564689	2.71E-45	3.69E-43	520	520
TIMM16	0.565219577	3.14E-45	4.25E-43	520	520
UBAC1	0.565193311	3.18E-45	4.27E-43	520	520
NTHL1	0.565122132	3.28E-45	4.38E-43	520	520
MCM3	0.564930791	3.56E-45	4.72E-43	520	520
TRAF2	0.564762284	3.83E-45	5.05E-43	520	520
NCAPH2	0.563833696	5.71E-45	7.48E-43	520	520
MUTYH	0.563560684	6.42E-45	8.36E-43	520	520
C21orf58	0.563173393	7.59E-45	9.81E-43	520	520
PAQR4	0.562254632	1.12E-44	1.44E-42	520	520
MRPS9	0.562159936	1.17E-44	1.49E-42	520	520
SPAG5	0.561812178	1.36E-44	1.72E-42	520	520
RANBP1	0.561017725	1.91E-44	2.40E-42	520	520
EXOSC2	0.56099358	1.93E-44	2.41E-42	520	520
DAZAP1	0.560352163	2.53E-44	3.13E-42	520	520
HAUS5	0.559890073	3.08E-44	3.79E-42	520	520
LSM2	0.559648314	3.41E-44	4.17E-42	520	520
PAFAH1B3	0.559551717	3.55E-44	4.32E-42	520	520
IQCC	0.558521634	5.49E-44	6.63E-42	520	520
C16orf79	0.557738043	7.64E-44	9.18E-42	520	519
DDX12	0.557724104	7.69E-44	9.18E-42	520	520
FBL	0.555636964	1.85E-43	2.18E-41	520	520
SNRPA1	0.555359018	2.07E-43	2.43E-41	520	520
HNRNPL	0.55391398	3.79E-43	4.41E-41	520	520
HAUS7	0.553557527	4.39E-43	5.09E-41	520	520
U2AF1	0.553347794	4.79E-43	5.49E-41	520	520
QTRT1	0.553009917	5.51E-43	6.28E-41	520	520
FAM72B	0.552853707	5.88E-43	6.66E-41	520	520
MXD3	0.552610313	6.50E-43	7.33E-41	520	520
EXOSC5	0.552122146	7.96E-43	8.91E-41	520	520
GIYD2	0.550950764	1.29E-42	1.44E-40	520	520
CHEK2	0.549579577	2.27E-42	2.51E-40	520	520
HNRNPM	0.549248954	2.59E-42	2.84E-40	520	520
MYBL2	0.548574043	3.42E-42	3.72E-40	520	520
CORT	0.547662886	4.95E-42	5.34E-40	520	495
SUV420H2	0.546798451	7.04E-42	7.51E-40	520	520
C1orf112	0.54623021	8.86E-42	9.41E-40	520	520
KIAA0101	0.54606872	9.46E-42	9.99E-40	520	520
POLR2H	0.545293379	1.29E-41	1.36E-39	520	520
NFKBIL2	0.54526193	1.31E-41	1.37E-39	520	520
RBMX	0.544535996	1.76E-41	1.83E-39	520	520
RPP21	0.543744139	2.42E-41	2.50E-39	520	520
DDX39	0.543266312	2.93E-41	3.00E-39	520	520
C1orf77	0.543198246	3.01E-41	3.06E-39	520	520
BCL7C	0.542876833	3.42E-41	3.47E-39	520	520
ORC6L	0.542777518	3.56E-41	3.59E-39	520	520
RAD51C	0.541969136	4.92E-41	4.91E-39	520	520
PABPN1	0.541679009	5.52E-41	5.49E-39	520	520
CDKN3	0.540788615	7.88E-41	7.78E-39	520	520
POLE2	0.54071234	8.12E-41	7.95E-39	520	520
OBFC2B	0.539641797	1.24E-40	1.20E-38	520	520
RHOT2	0.538694475	1.81E-40	1.74E-38	520	520
TMEM186	0.537718177	2.65E-40	2.55E-38	520	520
C6orf26	0.537577311	2.81E-40	2.68E-38	520	520
PTMA	0.537166309	3.30E-40	3.14E-38	520	520
POLA2	0.536732653	3.91E-40	3.70E-38	520	520
CCNB1	0.535336829	6.75E-40	6.33E-38	520	520
THOC4	0.53521244	7.09E-40	6.59E-38	520	520
TFAP4	0.534715922	8.60E-40	7.88E-38	520	520
LRRC45	0.534640756	8.86E-40	8.08E-38	520	520
SNRPE	0.534626127	8.91E-40	8.09E-38	520	520
EWSR1	0.53415798	1.07E-39	9.62E-38	520	520
ZNF768	0.533759065	1.25E-39	1.12E-37	520	520
ZWINT	0.533490884	1.39E-39	1.24E-37	520	520
C9orf37	0.533463819	1.40E-39	1.24E-37	520	520
HSPBP1	0.533178812	1.56E-39	1.38E-37	520	520
ZNF534	0.532290765	2.21E-39	1.94E-37	520	518
FUS	0.531761579	2.71E-39	2.37E-37	520	520
LSM5	0.53148214	3.01E-39	2.62E-37	520	520
HSPE1	0.531230374	3.32E-39	2.87E-37	520	520
TAZ	0.530812576	3.90E-39	3.36E-37	520	520
FAM195A	0.530621838	4.20E-39	3.59E-37	520	520
SFRS16	0.530621702	4.20E-39	3.59E-37	520	520
HSPB11	0.530138259	5.05E-39	4.30E-37	520	520
PSMB3	0.530051945	5.22E-39	4.41E-37	520	520
CDC6	0.530049598	5.23E-39	4.41E-37	520	520
TELO2	0.529740621	5.89E-39	4.92E-37	520	520
APITD1	0.529260391	7.07E-39	5.87E-37	520	520
NDUFAB1	0.528166932	1.07E-38	8.84E-37	520	520
CDK5RAP1	0.527611325	1.33E-38	1.09E-36	520	520
NEK2	0.527101538	1.61E-38	1.32E-36	520	520
PMF1	0.526411588	2.09E-38	1.70E-36	520	520
KIF18B	0.526386302	2.11E-38	1.70E-36	520	520
PBK	0.525820076	2.62E-38	2.10E-36	520	520
CCDC58	0.525631766	2.81E-38	2.25E-36	520	520
ERAL1	0.525599225	2.85E-38	2.27E-36	520	520
SURF6	0.525245311	3.26E-38	2.57E-36	520	520
NSMCE4A	0.525099242	3.44E-38	2.71E-36	520	520
LOC100130932	0.524888636	3.72E-38	2.92E-36	520	520
RPUSD1	0.524814258	3.83E-38	2.99E-36	520	520
THOC1	0.524421642	4.44E-38	3.44E-36	520	520
GTPBP3	0.524260021	4.72E-38	3.65E-36	520	520
METT11D1	0.524045467	5.12E-38	3.92E-36	520	520
NARFL	0.523998168	5.21E-38	3.96E-36	520	520
CCNF	0.523878502	5.45E-38	4.11E-36	520	520
SNRPB	0.523248152	6.90E-38	5.17E-36	520	520
MSH5	0.52267563	8.55E-38	6.39E-36	520	520
MRPS34	0.522428583	9.38E-38	6.98E-36	520	520
PLK1	0.522350023	9.66E-38	7.16E-36	520	520
PTTG3P	0.522331238	9.73E-38	7.19E-36	520	520
SFRS7	0.522194791	1.02E-37	7.54E-36	520	520
XAB2	0.522148336	1.04E-37	7.64E-36	520	520
PSMG3	0.521683265	1.24E-37	9.06E-36	520	520
ILKAP	0.52114519	1.51E-37	1.10E-35	520	520
RALY	0.521101856	1.54E-37	1.11E-35	520	520
RFXANK	0.520968433	1.62E-37	1.17E-35	520	520
C12orf47	0.519994872	2.32E-37	1.66E-35	520	520
MCM2	0.519007227	3.35E-37	2.36E-35	520	520
H1FX	0.51881772	3.59E-37	2.52E-35	520	520
PXMP2	0.518461667	4.10E-37	2.86E-35	520	520
SNRPG	0.517221502	6.47E-37	4.44E-35	520	520
CHAF1B	0.516733939	7.74E-37	5.29E-35	520	520
C18orf56	0.516588524	8.17E-37	5.56E-35	520	520
LOC150776	0.516242306	9.27E-37	6.29E-35	520	520
MRPL9	0.514347052	1.85E-36	1.25E-34	520	520
ZNF511	0.514305298	1.88E-36	1.26E-34	520	520
WDR5	0.513599363	2.43E-36	1.63E-34	520	520
WDR83	0.513430457	2.59E-36	1.73E-34	520	520
HNRNPA1	0.51320401	2.81E-36	1.86E-34	520	520
SKA1	0.512611004	3.48E-36	2.29E-34	520	520
SNHG1	0.511690335	4.86E-36	3.18E-34	520	520
LSM7	0.510610883	7.16E-36	4.64E-34	520	520
PRR14	0.510499765	7.46E-36	4.82E-34	520	520
LOC100216545	0.50995065	9.08E-36	5.85E-34	520	520
SNHG12	0.509661932	1.01E-35	6.47E-34	520	520
C6orf136	0.508598514	1.47E-35	9.30E-34	520	520
E4F1	0.508594738	1.48E-35	9.30E-34	520	520
GINS1	0.508327227	1.62E-35	1.02E-33	520	520
WDR62	0.508255335	1.67E-35	1.04E-33	520	520
THOP1	0.507875992	1.91E-35	1.19E-33	520	520
TACO1	0.507870819	1.91E-35	1.19E-33	520	520
CDK5RAP3	0.507781825	1.97E-35	1.22E-33	520	520
CACYBP	0.507652508	2.07E-35	1.27E-33	520	520
EXOSC9	0.507623768	2.09E-35	1.28E-33	520	520
CDK4	0.506834198	2.76E-35	1.69E-33	520	520
TRMT1	0.506409505	3.21E-35	1.95E-33	520	520
SDHAF1	0.506404629	3.22E-35	1.95E-33	520	520
MRPS2	0.506095342	3.59E-35	2.16E-33	520	520
GCDH	0.505995864	3.72E-35	2.23E-33	520	520
C16orf93	0.505878697	3.88E-35	2.31E-33	520	520
TYMS	0.505568023	4.33E-35	2.57E-33	520	520
WASH7P	0.50536691	4.65E-35	2.75E-33	520	520
MRPL22	0.504863018	5.55E-35	3.26E-33	520	520
ZNRD1	0.504836871	5.61E-35	3.29E-33	520	520
LAGE3	0.504691125	5.90E-35	3.45E-33	520	520
SURF2	0.504570907	6.16E-35	3.59E-33	520	520
CWF19L1	0.504314971	6.74E-35	3.92E-33	520	520
DSCC1	0.50430618	6.76E-35	3.92E-33	520	520
FANCL	0.502492322	1.28E-34	7.30E-33	520	520
ZNF205	0.502282792	1.38E-34	7.81E-33	520	520
SSNA1	0.501179881	2.02E-34	1.14E-32	520	520
PSMB4	0.50076944	2.33E-34	1.31E-32	520	520
TIPIN	0.500740402	2.36E-34	1.32E-32	520	520
NSUN5P2	0.500620707	2.46E-34	1.38E-32	520	520
FANCI	0.499527546	3.59E-34	1.99E-32	520	520
ZNF789	0.498795626	4.63E-34	2.55E-32	520	520
CDC25A	0.498604786	4.94E-34	2.71E-32	520	520
POLG2	0.498564333	5.01E-34	2.74E-32	520	520
NSUN5	0.498506523	5.11E-34	2.79E-32	520	520
WDR74	0.4976797	6.80E-34	3.69E-32	520	520
CHCHD6	0.497676478	6.81E-34	3.69E-32	520	520
NDUFS3	0.497615446	6.95E-34	3.76E-32	520	520
ORC1L	0.497516959	7.19E-34	3.88E-32	520	520
POLE	0.497442272	7.38E-34	3.97E-32	520	520
MRPL46	0.496980871	8.65E-34	4.64E-32	520	520
TARDBP	0.496815718	9.16E-34	4.90E-32	520	520
TARBP2	0.496677974	9.60E-34	5.12E-32	520	520
HJURP	0.496401609	1.06E-33	5.60E-32	520	520
TPRKB	0.496049778	1.19E-33	6.29E-32	520	520
UBE2I	0.496022799	1.20E-33	6.33E-32	520	520
SLC25A19	0.495784562	1.30E-33	6.83E-32	520	520
TRAP1	0.495241891	1.57E-33	8.18E-32	520	520
COX5B	0.495198803	1.59E-33	8.28E-32	520	520
MRPL2	0.495160206	1.62E-33	8.37E-32	520	520
ZNHIT3	0.494940413	1.74E-33	9.00E-32	520	520
NRM	0.494909893	1.76E-33	9.07E-32	520	520
NRF1	0.494809527	1.82E-33	9.36E-32	520	520
SNRPC	0.49478018	1.84E-33	9.44E-32	520	520
MRPS26	0.494400538	2.09E-33	1.07E-31	520	520
LSM3	0.49425285	2.20E-33	1.12E-31	520	520
ZNF692	0.493868589	2.51E-33	1.27E-31	520	520
DHRS13	0.492945274	3.43E-33	1.73E-31	520	520
C19orf62	0.492331832	4.23E-33	2.11E-31	520	520
CCDC34	0.491444873	5.71E-33	2.83E-31	520	520
HNRNPA3	0.491218966	6.16E-33	3.04E-31	520	520
CENPN	0.490885977	6.89E-33	3.39E-31	520	520
TOMM40	0.490806478	7.08E-33	3.45E-31	520	520
SNRPD3	0.490803769	7.08E-33	3.45E-31	520	520
MRPL55	0.490725071	7.27E-33	3.53E-31	520	520
MRPS25	0.490308219	8.37E-33	4.04E-31	520	520
NSUN5P1	0.490267916	8.48E-33	4.07E-31	520	520
ANKS3	0.489880507	9.66E-33	4.63E-31	520	520
C17orf90	0.48952922	1.09E-32	5.18E-31	520	520
SNAPC4	0.488669134	1.45E-32	6.90E-31	520	520
DDX11	0.488090662	1.76E-32	8.33E-31	520	520
NUDC	0.487496229	2.15E-32	1.01E-30	520	520
TRIM28	0.487421097	2.20E-32	1.03E-30	520	520
MRPL47	0.487341758	2.26E-32	1.05E-30	520	520
POP7	0.487084786	2.46E-32	1.15E-30	520	520
SPC24	0.486977446	2.55E-32	1.18E-30	520	520
MRPL37	0.486622008	2.87E-32	1.33E-30	520	520
FAM158A	0.486482707	3.01E-32	1.38E-30	520	520
FAM128A	0.486358532	3.13E-32	1.44E-30	520	520
SF3A3	0.485350725	4.38E-32	2.01E-30	520	520
FAF1	0.485175297	4.64E-32	2.11E-30	520	520
NOL12	0.484963016	4.97E-32	2.26E-30	520	520
PRKRIP1	0.484621066	5.57E-32	2.52E-30	520	520
TSEN34	0.484338075	6.11E-32	2.76E-30	520	520
SNRPD2	0.484091666	6.63E-32	2.98E-30	520	520
NUBP2	0.483554948	7.91E-32	3.54E-30	520	520
H2AFX	0.4833753	8.39E-32	3.74E-30	520	520
TBC1D10B	0.483351101	8.46E-32	3.77E-30	520	520
KAT2A	0.483312166	8.57E-32	3.81E-30	520	520
SNHG10	0.483093697	9.21E-32	4.07E-30	520	520
PBX4	0.483036155	9.38E-32	4.12E-30	520	520
EXOSC8	0.482754571	1.03E-31	4.51E-30	520	520
C14orf181	0.482260795	1.21E-31	5.28E-30	520	520
HEXDC	0.482066348	1.29E-31	5.62E-30	520	520
STRA13	0.481927342	1.35E-31	5.85E-30	520	520
MRPL12	0.48186551	1.38E-31	5.96E-30	520	520
C9orf100	0.48181457	1.40E-31	6.04E-30	520	520
RPL26L1	0.481809536	1.40E-31	6.04E-30	520	520
LOC100128191	0.481574254	1.51E-31	6.51E-30	520	520
ICT1	0.481053165	1.80E-31	7.69E-30	520	520
DGUOK	0.480827174	1.93E-31	8.26E-30	520	520
LAS1L	0.480777223	1.96E-31	8.38E-30	520	520
SUZ12P	0.480303589	2.29E-31	9.73E-30	520	520
ZBTB48	0.480136742	2.42E-31	1.02E-29	520	520
MRPL4	0.479976604	2.55E-31	1.07E-29	520	520
C9orf114	0.479910375	2.61E-31	1.09E-29	520	520
DUS3L	0.479909406	2.61E-31	1.09E-29	520	520
RBM10	0.479802575	2.70E-31	1.13E-29	520	520
SF4	0.479755751	2.74E-31	1.14E-29	520	520
MRPS24	0.47968188	2.81E-31	1.17E-29	520	520
MAGOHB	0.479026778	3.47E-31	1.44E-29	520	520
NXT1	0.478929197	3.58E-31	1.48E-29	520	520
PARP2	0.478797747	3.74E-31	1.54E-29	520	520
SARNP	0.478240098	4.48E-31	1.84E-29	520	520
C14orf179	0.477876981	5.03E-31	2.05E-29	520	520
SFI1	0.477528298	5.63E-31	2.30E-29	520	520
PSMD4	0.477214855	6.23E-31	2.53E-29	520	520
SNF8	0.476765386	7.20E-31	2.92E-29	520	520
EXO1	0.476445602	7.98E-31	3.22E-29	520	520
SFRS2	0.476131863	8.83E-31	3.55E-29	520	520
RPP30	0.47611755	8.87E-31	3.56E-29	520	520
HDGFRP2	0.476062482	9.03E-31	3.61E-29	520	520
PRIM1	0.475885363	9.56E-31	3.82E-29	520	520
PPIE	0.475873709	9.59E-31	3.82E-29	520	520
BOLA1	0.475121427	1.22E-30	4.84E-29	520	520
ORAI1	0.474990389	1.27E-30	5.04E-29	520	520
NPIPL3	0.474397434	1.54E-30	6.05E-29	520	520
NOC4L	0.473667763	1.94E-30	7.60E-29	520	520
GTF2H4	0.473643887	1.96E-30	7.64E-29	520	520
DBF4B	0.473606231	1.98E-30	7.72E-29	520	520
RBM17	0.473509618	2.04E-30	7.95E-29	520	520
EXOSC7	0.473288985	2.19E-30	8.51E-29	520	520
CPSF4	0.473246279	2.22E-30	8.61E-29	520	520
CCDC78	0.472917908	2.46E-30	9.52E-29	520	517
C7orf47	0.472447738	2.86E-30	1.10E-28	520	520
ACD	0.472291099	3.01E-30	1.16E-28	520	520
C19orf43	0.472251799	3.04E-30	1.17E-28	520	520
FANCG	0.472126588	3.17E-30	1.21E-28	520	520
COX6A1	0.471902376	3.40E-30	1.30E-28	520	520
MRPL34	0.471544437	3.81E-30	1.45E-28	520	520
CALML4	0.471458857	3.91E-30	1.48E-28	520	520
C14orf143	0.471354343	4.04E-30	1.53E-28	520	520
LEAP2	0.471062022	4.43E-30	1.67E-28	520	485
RDM1	0.470943877	4.60E-30	1.73E-28	520	506
BOLA2	0.470742437	4.91E-30	1.84E-28	520	520
MCM6	0.470697235	4.98E-30	1.86E-28	520	520
TPRN	0.470404113	5.46E-30	2.03E-28	520	520
HMG20B	0.470204618	5.81E-30	2.16E-28	520	520
MRPL16	0.470177148	5.86E-30	2.17E-28	520	520
FANCC	0.469812729	6.57E-30	2.43E-28	520	520
DMAP1	0.469616559	6.99E-30	2.57E-28	520	520
MRPS5	0.46934336	7.62E-30	2.79E-28	520	520
FDX1L	0.469341814	7.62E-30	2.79E-28	520	520
C15orf21	0.469334871	7.64E-30	2.79E-28	520	520
C12orf10	0.469095481	8.23E-30	3.00E-28	520	520
PELP1	0.46905368	8.34E-30	3.04E-28	520	520
CCDC56	0.468934427	8.66E-30	3.14E-28	520	520
SNHG6	0.468517808	9.87E-30	3.57E-28	520	520
THAP3	0.468392799	1.03E-29	3.69E-28	520	520
SDR39U1	0.46837331	1.03E-29	3.71E-28	520	520
SNHG7	0.468225728	1.08E-29	3.88E-28	520	520
IRF3	0.468175685	1.10E-29	3.93E-28	520	520
TIMM50	0.467127007	1.52E-29	5.40E-28	520	520
POP5	0.467101553	1.54E-29	5.43E-28	520	520
ZGLP1	0.46664215	1.77E-29	6.26E-28	520	519
SNRNP40	0.466623148	1.78E-29	6.28E-28	520	520
C6orf125	0.466567494	1.81E-29	6.38E-28	520	520
NCRNA00176	0.466530028	1.83E-29	6.45E-28	520	519
DDX51	0.466319206	1.96E-29	6.86E-28	520	520
RAD54B	0.466313415	1.96E-29	6.86E-28	520	520
HNRNPD	0.466271659	1.99E-29	6.94E-28	520	520
MTP18	0.46597971	2.18E-29	7.55E-28	520	520
RRP1	0.465872043	2.25E-29	7.76E-28	520	520
MRPS11	0.465775446	2.32E-29	7.98E-28	520	520
ATP5G1	0.465752294	2.34E-29	8.02E-28	520	520
TIMM44	0.465730342	2.35E-29	8.07E-28	520	520
MLF1IP	0.46541407	2.59E-29	8.88E-28	520	520
HNRNPA3P1	0.465261331	2.72E-29	9.30E-28	520	520
COQ3	0.465149983	2.82E-29	9.61E-28	520	520
HEXIM2	0.464947288	3.00E-29	1.02E-27	520	520
NDUFB11	0.464918241	3.02E-29	1.03E-27	520	520
EPR1	0.464739534	3.20E-29	1.09E-27	520	518
TIGD3	0.464183636	3.80E-29	1.28E-27	520	520
LUC7L	0.4639399	4.09E-29	1.38E-27	520	520
NDUFB10	0.463842651	4.22E-29	1.41E-27	520	520
TOE1	0.463797665	4.28E-29	1.43E-27	520	520
DDX49	0.463773605	4.31E-29	1.44E-27	520	520
PRR22	0.463638511	4.49E-29	1.50E-27	520	520
TSFM	0.463621009	4.51E-29	1.50E-27	520	520
FAM173A	0.463547103	4.62E-29	1.53E-27	520	520
DCST2	0.463506363	4.68E-29	1.55E-27	520	517
MIIP	0.463417319	4.81E-29	1.59E-27	520	520
BCS1L	0.463353193	4.90E-29	1.62E-27	520	520
SCNM1	0.463325808	4.94E-29	1.63E-27	520	520
UQCRC1	0.463195447	5.15E-29	1.70E-27	520	520
RPUSD2	0.462896547	5.64E-29	1.85E-27	520	520
EEFSEC	0.462879324	5.67E-29	1.86E-27	520	520
PRPF31	0.462634681	6.11E-29	2.00E-27	520	520
RCC1	0.462626053	6.13E-29	2.00E-27	520	520
CCDC24	0.462566965	6.24E-29	2.03E-27	520	520
PSMG4	0.462517815	6.34E-29	2.06E-27	520	520
MRPS18B	0.462453902	6.46E-29	2.10E-27	520	520
MTX1	0.462283738	6.81E-29	2.20E-27	520	520
CDKN2AIPNL	0.461894612	7.67E-29	2.48E-27	520	520
ZFYVE19	0.461818262	7.85E-29	2.53E-27	520	520
LOC339674	0.461804474	7.89E-29	2.53E-27	520	475
MAD2L1	0.461729993	8.07E-29	2.59E-27	520	520
C16orf13	0.461641941	8.29E-29	2.65E-27	520	520
MRPL28	0.461180122	9.55E-29	3.04E-27	520	520
CYP2D6	0.460967379	1.02E-28	3.23E-27	520	517
C3orf37	0.46072299	1.10E-28	3.47E-27	520	520
MMAB	0.46056251	1.15E-28	3.63E-27	520	520
TRUB2	0.46011217	1.32E-28	4.15E-27	520	520
C7orf44	0.459823303	1.44E-28	4.52E-27	520	520
SAP30	0.45980363	1.45E-28	4.54E-27	520	520
WDR8	0.459754746	1.47E-28	4.60E-27	520	520
SFXN4	0.45968413	1.51E-28	4.69E-27	520	520
DCXR	0.459635225	1.53E-28	4.75E-27	520	520
FAM73B	0.458977479	1.87E-28	5.77E-27	520	520
CCDC77	0.458977231	1.87E-28	5.77E-27	520	520
AK2	0.458835092	1.95E-28	6.01E-27	520	520
PFDN6	0.458797102	1.97E-28	6.07E-27	520	520
CCDC57	0.458641309	2.07E-28	6.33E-27	520	520
C16orf55	0.45850445	2.15E-28	6.58E-27	520	520
RHEBL1	0.458334862	2.27E-28	6.90E-27	520	520
SNHG11	0.458043686	2.48E-28	7.49E-27	520	520
RUVBL1	0.457993177	2.51E-28	7.59E-27	520	520
C1orf159	0.457945292	2.55E-28	7.69E-27	520	520
NGDN	0.457893205	2.59E-28	7.80E-27	520	520
NUP37	0.457879807	2.60E-28	7.82E-27	520	520
C12orf65	0.457835256	2.64E-28	7.92E-27	520	520
ALKBH6	0.457536252	2.89E-28	8.65E-27	520	520
LOC143666	0.457273661	3.13E-28	9.32E-27	520	520
C12orf45	0.457191272	3.20E-28	9.54E-27	520	520
TMEM183A	0.457031502	3.36E-28	9.98E-27	520	520
RTN4IP1	0.456903788	3.49E-28	1.04E-26	520	520
LOC93622	0.45672571	3.69E-28	1.09E-26	520	520
SF3A2	0.456658776	3.76E-28	1.11E-26	520	520
PDRG1	0.456650742	3.77E-28	1.11E-26	520	520
MED30	0.456649374	3.77E-28	1.11E-26	520	520
ZNF691	0.456435446	4.02E-28	1.18E-26	520	520
PPAN	0.456385665	4.08E-28	1.20E-26	520	520
FAM64A	0.456266133	4.23E-28	1.24E-26	520	520
TIMM10	0.455951177	4.65E-28	1.36E-26	520	520
PHF19	0.455946124	4.66E-28	1.36E-26	520	520
IMMP1L	0.455805262	4.86E-28	1.41E-26	520	520
SPSB3	0.455196193	5.84E-28	1.69E-26	520	520
MITD1	0.454943641	6.29E-28	1.82E-26	520	520
TAF6L	0.454928504	6.32E-28	1.82E-26	520	520
RIBC2	0.454922103	6.34E-28	1.82E-26	520	518
AGER	0.454772167	6.63E-28	1.90E-26	520	520
GEMIN6	0.454767492	6.63E-28	1.90E-26	520	520
CCDC130	0.454722941	6.72E-28	1.92E-26	520	520
C17orf56	0.454707552	6.76E-28	1.93E-26	520	520
TMEM97	0.454655977	6.86E-28	1.96E-26	520	520
AAAS	0.45458481	7.01E-28	2.00E-26	520	520
LOC152217	0.454249838	7.75E-28	2.20E-26	520	520
C17orf42	0.454246923	7.75E-28	2.20E-26	520	520
LOC146880	0.454022416	8.29E-28	2.34E-26	520	520
CCNO	0.454013473	8.31E-28	2.34E-26	520	520
ZNF771	0.453961364	8.44E-28	2.37E-26	520	520
PLEKHJ1	0.453933383	8.51E-28	2.39E-26	520	520
ATRIP	0.453580524	9.46E-28	2.64E-26	520	520
CENPK	0.453529933	9.60E-28	2.68E-26	520	520
HIST1H3B	0.453499409	9.69E-28	2.70E-26	520	454
PQBP1	0.453393206	1.00E-27	2.78E-26	520	520
HMGN1	0.453338023	1.02E-27	2.82E-26	520	520
HIST2H2AC	0.453288879	1.03E-27	2.86E-26	520	520
NOP58	0.453229161	1.05E-27	2.91E-26	520	520
SAMD1	0.4531405	1.08E-27	2.98E-26	520	520
NUSAP1	0.453019956	1.12E-27	3.08E-26	520	520
MKS1	0.452985964	1.13E-27	3.11E-26	520	520
NDUFA2	0.452882944	1.16E-27	3.20E-26	520	520
ANP32A	0.452834585	1.18E-27	3.24E-26	520	520
NOP56	0.45246503	1.32E-27	3.61E-26	520	520
PSMA4	0.4524304	1.33E-27	3.64E-26	520	520
CDCA7	0.45242177	1.33E-27	3.64E-26	520	520
NDUFA6	0.452404282	1.34E-27	3.66E-26	520	520
MRPL52	0.452136304	1.45E-27	3.95E-26	520	520
DIABLO	0.452057499	1.49E-27	4.04E-26	520	520
CHCHD1	0.451717261	1.64E-27	4.46E-26	520	520
KRI1	0.451528521	1.74E-27	4.71E-26	520	520
TMEM106C	0.451507604	1.75E-27	4.73E-26	520	520
MRPL51	0.451501995	1.75E-27	4.73E-26	520	520
NANS	0.451145299	1.95E-27	5.24E-26	520	520
CTU1	0.450995321	2.04E-27	5.47E-26	520	520
NME1	0.45096513	2.05E-27	5.50E-26	520	520
CDK3	0.450432041	2.40E-27	6.39E-26	520	520
C15orf63	0.450297703	2.50E-27	6.63E-26	520	520
FAM128B	0.450212914	2.57E-27	6.79E-26	520	520
C11orf48	0.450150848	2.61E-27	6.90E-26	520	520
GGCT	0.450055916	2.69E-27	7.08E-26	520	520
NAA38	0.449900896	2.81E-27	7.40E-26	520	520
WASH3P	0.44938617	3.27E-27	8.57E-26	520	520
MED27	0.449215437	3.44E-27	8.99E-26	520	520
DOC2A	0.449192343	3.46E-27	9.02E-26	520	495
MCAT	0.449022583	3.64E-27	9.47E-26	520	520
NDUFV1	0.449011457	3.65E-27	9.49E-26	520	520
PILRB	0.448989875	3.68E-27	9.54E-26	520	520
DPY30	0.448956069	3.71E-27	9.60E-26	520	520
ST20	0.448951185	3.72E-27	9.60E-26	520	520
CENPO	0.448858503	3.82E-27	9.85E-26	520	520
MRPS16	0.448787589	3.90E-27	1.00E-25	520	520
MLST8	0.448646615	4.07E-27	1.04E-25	520	520
C9orf140	0.448615537	4.10E-27	1.05E-25	520	520
RUVBL2	0.447973053	4.95E-27	1.26E-25	520	520
CYC1	0.447952035	4.98E-27	1.27E-25	520	520
SKA3	0.447719648	5.33E-27	1.35E-25	520	520
SNHG3	0.447568594	5.57E-27	1.41E-25	520	520
UXT	0.447469396	5.74E-27	1.45E-25	520	520
TPX2	0.44683071	6.91E-27	1.74E-25	520	520
RNF220	0.446739131	7.10E-27	1.78E-25	520	520
BANF1	0.446691016	7.20E-27	1.81E-25	520	520
YBX2	0.446510681	7.59E-27	1.90E-25	520	487
C15orf23	0.446479624	7.66E-27	1.91E-25	520	520
MAMDC4	0.446276794	8.12E-27	2.02E-25	520	520
OGFOD2	0.44625909	8.16E-27	2.03E-25	520	520
ZNF688	0.446214972	8.27E-27	2.05E-25	520	520
POLR2I	0.446212563	8.27E-27	2.05E-25	520	520
NDUFS7	0.445989773	8.83E-27	2.19E-25	520	520
TUBA1B	0.445952942	8.92E-27	2.21E-25	520	520
NCAPG	0.44583127	9.24E-27	2.29E-25	520	520
NHP2	0.445688224	9.64E-27	2.38E-25	520	520
COX7B	0.444979414	1.18E-26	2.90E-25	520	520
C8orf59	0.444868004	1.22E-26	2.99E-25	520	520
RDBP	0.444842354	1.23E-26	3.01E-25	520	520
PUS1	0.444560517	1.34E-26	3.25E-25	520	520
NDUFA9	0.444498984	1.36E-26	3.31E-25	520	520
PPOX	0.444400616	1.40E-26	3.40E-25	520	520
WDR18	0.444169295	1.50E-26	3.62E-25	520	520
CDK10	0.444058599	1.54E-26	3.73E-25	520	520
HAGHL	0.443621145	1.75E-26	4.22E-25	520	520
BCAT2	0.443496114	1.82E-26	4.36E-25	520	520
C16orf61	0.443443265	1.84E-26	4.42E-25	520	520
RASSF7	0.443375919	1.88E-26	4.50E-25	520	520
PSMG2	0.443278098	1.93E-26	4.63E-25	520	520
THAP7	0.443197099	1.98E-26	4.73E-25	520	520
ECSIT	0.443019352	2.08E-26	4.97E-25	520	520
CCDC94	0.44270741	2.28E-26	5.43E-25	520	520
CPSF3	0.442627039	2.33E-26	5.54E-25	520	520
RPP25	0.442620835	2.34E-26	5.54E-25	520	520
REM2	0.442445494	2.46E-26	5.81E-25	520	518
TIMM17B	0.442405524	2.49E-26	5.87E-25	520	520
RRP7B	0.442376285	2.51E-26	5.91E-25	520	520
COX4I1	0.441965813	2.82E-26	6.62E-25	520	520
PSMC5	0.441946928	2.84E-26	6.65E-25	520	520
MRPL23	0.441473065	3.25E-26	7.53E-25	520	520
MACROD1	0.441422527	3.30E-26	7.63E-25	520	520
SKA2	0.44123616	3.48E-26	8.01E-25	520	520
CCBL1	0.440829776	3.90E-26	8.98E-25	520	520
COBRA1	0.440783289	3.96E-26	9.09E-25	520	520
AKAP8L	0.44057472	4.20E-26	9.61E-25	520	520
CLN6	0.440377756	4.44E-26	1.01E-24	520	520
DNAJC17	0.440343865	4.48E-26	1.02E-24	520	520
PABPC1L	0.44019283	4.68E-26	1.07E-24	520	520
C2orf64	0.440170896	4.71E-26	1.07E-24	520	520
ALKBH2	0.440077871	4.84E-26	1.10E-24	520	520
C19orf60	0.439934588	5.04E-26	1.14E-24	520	520
UQCRH	0.439737638	5.33E-26	1.21E-24	520	520
LOC284900	0.439180939	6.24E-26	1.41E-24	520	520
CNTD1	0.43915554	6.29E-26	1.42E-24	520	520
CCDC45	0.438983244	6.60E-26	1.49E-24	520	520
LMNB1	0.438737525	7.08E-26	1.59E-24	520	520
PIN1	0.43871883	7.12E-26	1.60E-24	520	520
EIF3K	0.438530741	7.51E-26	1.68E-24	520	520
NT5C	0.438160671	8.34E-26	1.86E-24	520	520
CATSPER3	0.438016771	8.69E-26	1.94E-24	520	518
SMARCD2	0.437411512	1.03E-25	2.29E-24	520	520
SIP1	0.437171586	1.10E-25	2.45E-24	520	520
PIH1D1	0.437039489	1.14E-25	2.54E-24	520	520
DTNBP1	0.436985858	1.16E-25	2.57E-24	520	520
LSMD1	0.436922311	1.18E-25	2.62E-24	520	520
IFI27L1	0.436685856	1.26E-25	2.79E-24	520	520
CPT1B	0.436684115	1.27E-25	2.79E-24	520	520
C6orf130	0.436179276	1.46E-25	3.20E-24	520	520
PRPF38A	0.436132593	1.48E-25	3.24E-24	520	520
PPCDC	0.436113847	1.49E-25	3.26E-24	520	520
PHB	0.436021097	1.53E-25	3.34E-24	520	520
SARS2	0.435871773	1.59E-25	3.48E-24	520	520
CDC7	0.435870504	1.59E-25	3.48E-24	520	520
TMEM203	0.435798738	1.62E-25	3.54E-24	520	520
VPS72	0.435795271	1.63E-25	3.54E-24	520	520
TCOF1	0.435599156	1.72E-25	3.73E-24	520	520
USF1	0.435528632	1.75E-25	3.80E-24	520	520
CROCCL1	0.435251114	1.89E-25	4.10E-24	520	520
RPAIN	0.435195052	1.92E-25	4.16E-24	520	520
EBP	0.434930647	2.07E-25	4.47E-24	520	520
NSMCE1	0.434848449	2.12E-25	4.57E-24	520	520
ATAD3A	0.434834874	2.13E-25	4.58E-24	520	520
FAM24B	0.434749291	2.18E-25	4.68E-24	520	518
C19orf52	0.434714033	2.20E-25	4.73E-24	520	520
ZNF232	0.434631663	2.25E-25	4.83E-24	520	520
RBM42	0.434579628	2.28E-25	4.90E-24	520	520
DNTTIP1	0.434324486	2.45E-25	5.23E-24	520	520
NUDCD2	0.43428719	2.48E-25	5.28E-24	520	520
HMGB1	0.434095648	2.62E-25	5.56E-24	520	520
C11orf31	0.434079417	2.63E-25	5.58E-24	520	520
KIAA1875	0.433687472	2.93E-25	6.20E-24	520	505
FBXW9	0.433631877	2.98E-25	6.29E-24	520	520
TMEM39B	0.433482473	3.10E-25	6.54E-24	520	520
WBSCR22	0.433468175	3.12E-25	6.56E-24	520	520
ANKRD19	0.433427121	3.15E-25	6.63E-24	520	520
C19orf36	0.433295819	3.27E-25	6.87E-24	520	520
ING5	0.433209058	3.35E-25	7.02E-24	520	520
OSGEP	0.433070846	3.48E-25	7.28E-24	520	520
FBXO43	0.432477547	4.11E-25	8.57E-24	520	517
C14orf156	0.432069368	4.60E-25	9.56E-24	520	520
SLC27A5	0.431823937	4.92E-25	1.02E-23	520	520
SDCCAG3	0.431787205	4.97E-25	1.03E-23	520	520
MRPL18	0.431733954	5.05E-25	1.04E-23	520	520
XRCC1	0.431725054	5.06E-25	1.05E-23	520	520
ZNF576	0.431634269	5.19E-25	1.07E-23	520	520
PPP4C	0.431629639	5.19E-25	1.07E-23	520	520
HSF4	0.431493954	5.39E-25	1.11E-23	520	520
C16orf91	0.43119533	5.86E-25	1.20E-23	520	520
E2F2	0.431062583	6.08E-25	1.25E-23	520	520
TMEM205	0.4308389	6.47E-25	1.32E-23	520	520
BAX	0.430775907	6.58E-25	1.35E-23	520	520
MED9	0.430714124	6.69E-25	1.37E-23	520	520
PPM1G	0.430690752	6.74E-25	1.37E-23	520	520
ASPSCR1	0.430603533	6.90E-25	1.40E-23	520	520
H2AFV	0.430596529	6.91E-25	1.40E-23	520	520
C17orf75	0.430183936	7.75E-25	1.57E-23	520	520
MRPS12	0.430175451	7.76E-25	1.57E-23	520	520
PDCD5	0.430057609	8.02E-25	1.62E-23	520	520
NCAPH	0.429962426	8.23E-25	1.66E-23	520	520
SAE1	0.42994259	8.28E-25	1.67E-23	520	520
RFC5	0.42990036	8.38E-25	1.69E-23	520	520
RBMX2	0.429615454	9.06E-25	1.82E-23	520	520
MTHFS	0.429125515	1.04E-24	2.07E-23	520	520
IDH3B	0.429059355	1.06E-24	2.10E-23	520	520
DTL	0.428828393	1.12E-24	2.23E-23	520	520
C5orf45	0.428737154	1.15E-24	2.28E-23	520	520
KIF15	0.428733366	1.15E-24	2.28E-23	520	520
ARL6IP4	0.428634327	1.19E-24	2.34E-23	520	520
HIGD2A	0.428500069	1.23E-24	2.43E-23	520	520
ISOC2	0.428317198	1.29E-24	2.55E-23	520	520
PRMT1	0.428269396	1.31E-24	2.58E-23	520	520
TRMU	0.428186762	1.34E-24	2.63E-23	520	520
SMUG1	0.428096559	1.37E-24	2.69E-23	520	520
ITPKA	0.428048959	1.39E-24	2.72E-23	520	520
COX19	0.428033493	1.40E-24	2.73E-23	520	520
C13orf27	0.427763882	1.51E-24	2.94E-23	520	520
MRPS21	0.427355155	1.68E-24	3.27E-23	520	520
C11orf83	0.427280854	1.72E-24	3.33E-23	520	520
ISY1	0.427147394	1.78E-24	3.45E-23	520	520
HSCB	0.427124595	1.79E-24	3.47E-23	520	520
DPM2	0.42699571	1.86E-24	3.59E-23	520	520
C12orf73	0.426864777	1.92E-24	3.72E-23	520	520
BLM	0.426605173	2.07E-24	3.99E-23	520	520
CRYBB3	0.426565638	2.09E-24	4.03E-23	520	463
UHRF1	0.426561934	2.09E-24	4.03E-23	520	520
TMEM160	0.426529708	2.11E-24	4.06E-23	520	520
CDCA8	0.426373373	2.20E-24	4.23E-23	520	520
CYP2D7P1	0.42596242	2.46E-24	4.71E-23	520	517
UQCRHL	0.425873583	2.52E-24	4.81E-23	520	520
KIF4A	0.42577128	2.59E-24	4.93E-23	520	520
ZNF263	0.425551839	2.75E-24	5.23E-23	520	520
BLOC1S1	0.425546783	2.75E-24	5.23E-23	520	520
NDUFA8	0.425289568	2.95E-24	5.59E-23	520	520
SIRT6	0.425097252	3.11E-24	5.89E-23	520	520
PMPCA	0.425021103	3.18E-24	6.00E-23	520	520
ABT1	0.424872099	3.31E-24	6.23E-23	520	520
FH	0.424762602	3.41E-24	6.42E-23	520	520
LOC100288778	0.424381993	3.78E-24	7.08E-23	520	520
RPA2	0.424329268	3.83E-24	7.18E-23	520	520
NDUFB7	0.424238657	3.93E-24	7.35E-23	520	520
C17orf81	0.424202459	3.96E-24	7.42E-23	520	520
GRK6	0.423833977	4.38E-24	8.16E-23	520	520
POLE3	0.423786203	4.44E-24	8.25E-23	520	520
DCAF15	0.423598906	4.67E-24	8.66E-23	520	520
LSM6	0.423372278	4.96E-24	9.19E-23	520	520
TCTE3	0.423366988	4.97E-24	9.20E-23	520	520
WDR67	0.422947967	5.56E-24	1.03E-22	520	520
CIDECP	0.42286215	5.69E-24	1.05E-22	520	520
CD2BP2	0.422717668	5.92E-24	1.09E-22	520	520
AURKA	0.422671784	5.99E-24	1.10E-22	520	520
ILF3	0.421968053	7.24E-24	1.32E-22	520	520
PIGU	0.421812876	7.54E-24	1.38E-22	520	520
CD320	0.421618709	7.95E-24	1.44E-22	520	520
C10orf4	0.421580729	8.03E-24	1.46E-22	520	520
RNMTL1	0.421494857	8.21E-24	1.49E-22	520	520
MRPL41	0.421485374	8.24E-24	1.49E-22	520	520
HMGB3	0.421335693	8.57E-24	1.55E-22	520	520
DNAJC8	0.421228184	8.82E-24	1.60E-22	520	520
ACBD6	0.420976752	9.44E-24	1.70E-22	520	520
CATSPER2	0.420872154	9.70E-24	1.75E-22	520	520
KHK	0.420841232	9.78E-24	1.76E-22	520	520
HNRNPA2B1	0.420523725	1.07E-23	1.90E-22	520	520
TMEM86B	0.42025887	1.14E-23	2.04E-22	520	520
FAM96A	0.42016113	1.17E-23	2.09E-22	520	520
BNIP1	0.420156651	1.17E-23	2.09E-22	520	520
C7orf40	0.420124709	1.18E-23	2.11E-22	520	520
POLR2F	0.420011493	1.22E-23	2.17E-22	520	520
MST1P2	0.419879662	1.26E-23	2.24E-22	520	519
LYRM4	0.41975622	1.31E-23	2.31E-22	520	520
PDHA1	0.419752739	1.31E-23	2.31E-22	520	520
RPL35A	0.419581097	1.37E-23	2.41E-22	520	520
C1orf213	0.419491386	1.40E-23	2.47E-22	520	520
C6orf41	0.419472962	1.41E-23	2.48E-22	520	511
MRPL24	0.419418353	1.43E-23	2.51E-22	520	520
SMPD4	0.419361765	1.45E-23	2.55E-22	520	520
TBCD	0.419316973	1.47E-23	2.57E-22	520	520
COQ4	0.418949839	1.62E-23	2.82E-22	520	520
RPS15A	0.418833748	1.67E-23	2.91E-22	520	520
EMD	0.418764093	1.70E-23	2.96E-22	520	520
SCAND2	0.418448059	1.85E-23	3.21E-22	520	520
PTGES2	0.418427468	1.86E-23	3.23E-22	520	520
KLHDC4	0.418419246	1.86E-23	3.23E-22	520	520
PKN3	0.418351321	1.90E-23	3.29E-22	520	520
RPS21	0.417939384	2.12E-23	3.65E-22	520	520
DEPDC1B	0.417919634	2.13E-23	3.66E-22	520	520
COX6C	0.417910735	2.13E-23	3.67E-22	520	520
GADD45GIP1	0.417854732	2.16E-23	3.72E-22	520	520
FLJ45244	0.417666002	2.28E-23	3.90E-22	520	520
MCRS1	0.417603932	2.31E-23	3.95E-22	520	520
MRP63	0.417328655	2.49E-23	4.24E-22	520	520
ARL16	0.417293892	2.51E-23	4.27E-22	520	520
KCTD13	0.417178091	2.59E-23	4.40E-22	520	520
EZH2	0.417046575	2.68E-23	4.55E-22	520	520
NDUFS6	0.416974229	2.73E-23	4.63E-22	520	520
SHMT2	0.416774341	2.88E-23	4.87E-22	520	520
HIST1H2AJ	0.41649084	3.10E-23	5.24E-22	520	452
NVL	0.416398656	3.18E-23	5.36E-22	520	520
PRPF19	0.416319393	3.25E-23	5.47E-22	520	520
HAUS4	0.416205366	3.35E-23	5.63E-22	520	520
CCDC59	0.416020662	3.51E-23	5.90E-22	520	520
ABHD11	0.415915792	3.61E-23	6.05E-22	520	520
SURF1	0.41571134	3.81E-23	6.38E-22	520	520
C14orf93	0.415522819	4.00E-23	6.70E-22	520	520
SS18L2	0.41533218	4.21E-23	7.03E-22	520	520
DNAJC19	0.414982538	4.61E-23	7.69E-22	520	520
TMCO6	0.414805535	4.83E-23	8.04E-22	520	520
FAM98C	0.414803266	4.83E-23	8.04E-22	520	520
COX5A	0.41470395	4.96E-23	8.25E-22	520	520
MRPS23	0.414631315	5.06E-23	8.39E-22	520	520
THAP11	0.4146002	5.10E-23	8.45E-22	520	520
ANKRD54	0.414445904	5.31E-23	8.79E-22	520	520
POLD2	0.414346409	5.45E-23	9.02E-22	520	520
C12orf76	0.414318562	5.49E-23	9.08E-22	520	520
PHF5A	0.414213329	5.64E-23	9.32E-22	520	520
HELLS	0.413886852	6.14E-23	1.01E-21	520	520
LOC729375	0.413755421	6.36E-23	1.04E-21	520	520
ACP1	0.413673471	6.49E-23	1.07E-21	520	520
C17orf95	0.413413537	6.95E-23	1.14E-21	520	520
RAD23A	0.413261258	7.23E-23	1.18E-21	520	520
ANAPC16	0.413157412	7.43E-23	1.21E-21	520	520
ARHGAP33	0.413086938	7.57E-23	1.24E-21	520	520
RPS2	0.413084276	7.57E-23	1.24E-21	520	520
GNRH1	0.413024287	7.69E-23	1.25E-21	520	519
MTCP1NB	0.412730752	8.30E-23	1.35E-21	520	520
RPL35	0.412698596	8.37E-23	1.36E-21	520	520
EEF1E1	0.412555551	8.69E-23	1.41E-21	520	520
TMEM201	0.412513675	8.78E-23	1.43E-21	520	520
YJEFN3	0.412410395	9.02E-23	1.46E-21	520	513
FKBP3	0.412299673	9.29E-23	1.50E-21	520	520
WASH2P	0.412051595	9.90E-23	1.60E-21	520	520
NFATC2IP	0.411947102	1.02E-22	1.64E-21	520	520
DEF6	0.411917691	1.03E-22	1.65E-21	520	520
FBXO5	0.411779059	1.06E-22	1.71E-21	520	520
FANCD2	0.411748918	1.07E-22	1.72E-21	520	520
DHODH	0.411504605	1.14E-22	1.83E-21	520	520
GEMIN7	0.411337822	1.19E-22	1.91E-21	520	520
C15orf42	0.411336583	1.19E-22	1.91E-21	520	520
TMEM223	0.411289261	1.21E-22	1.93E-21	520	520
AKR7L	0.411272371	1.21E-22	1.93E-21	520	517
NDUFS8	0.411142981	1.25E-22	2.00E-21	520	520
MCM10	0.410972097	1.31E-22	2.08E-21	520	520
FAM72D	0.410914446	1.33E-22	2.11E-21	520	520
CBX3	0.41036051	1.53E-22	2.43E-21	520	520
HAUS1	0.410136673	1.63E-22	2.56E-21	520	520
CHCHD4	0.410049469	1.66E-22	2.62E-21	520	520
RWDD3	0.409639314	1.85E-22	2.90E-21	520	520
KIAA0895L	0.40961453	1.86E-22	2.92E-21	520	520
LUC7L3	0.409177902	2.08E-22	3.25E-21	520	520
ALKBH4	0.40908375	2.13E-22	3.33E-21	520	520
TRMT2A	0.40903518	2.16E-22	3.37E-21	520	520
PRMT7	0.408782401	2.30E-22	3.58E-21	520	520
RTEL1	0.408736178	2.33E-22	3.62E-21	520	520
RHBDL1	0.408593679	2.42E-22	3.75E-21	520	520
RAD51AP1	0.408593073	2.42E-22	3.75E-21	520	520
RANBP3	0.408543552	2.45E-22	3.79E-21	520	520
TMEM180	0.408525242	2.46E-22	3.81E-21	520	520
NPFF	0.408411881	2.53E-22	3.92E-21	520	516
DUSP12	0.408270158	2.63E-22	4.06E-21	520	520
YDJC	0.407803522	2.96E-22	4.54E-21	520	520
PRR7	0.407539177	3.17E-22	4.85E-21	520	520
KHDRBS1	0.407523789	3.18E-22	4.87E-21	520	520
RPS19	0.407379584	3.30E-22	5.04E-21	520	520
FRAT2	0.407357215	3.32E-22	5.07E-21	520	520
NDUFA13	0.407286824	3.38E-22	5.15E-21	520	520
UCKL1	0.407063548	3.57E-22	5.43E-21	520	520
C4orf27	0.40698859	3.64E-22	5.53E-21	520	520
PEMT	0.406901291	3.73E-22	5.65E-21	520	520
PRR19	0.406895551	3.73E-22	5.65E-21	520	520
RPL24	0.406771943	3.85E-22	5.83E-21	520	520
RAE1	0.40660877	4.01E-22	6.07E-21	520	520
LOC643387	0.406558337	4.07E-22	6.13E-21	520	520
SYCE2	0.406413143	4.22E-22	6.35E-21	520	512
MRPS15	0.406384695	4.25E-22	6.39E-21	520	520
AIFM1	0.406220076	4.43E-22	6.66E-21	520	520
C4orf21	0.406112396	4.55E-22	6.83E-21	520	520
TCEB2	0.406104272	4.56E-22	6.84E-21	520	520
LYG1	0.405782583	4.95E-22	7.40E-21	520	503
BOLA3	0.405529203	5.28E-22	7.88E-21	520	520
ANAPC7	0.405428715	5.42E-22	8.07E-21	520	520
AGAP4	0.405282682	5.62E-22	8.37E-21	520	520
COPE	0.405140205	5.83E-22	8.66E-21	520	520
SLBP	0.4049842	6.06E-22	9.00E-21	520	520
ILF2	0.404782542	6.38E-22	9.45E-21	520	520
PRPF3	0.404684234	6.54E-22	9.69E-21	520	520
HNRNPAB	0.404671701	6.56E-22	9.71E-21	520	520
DHPS	0.404548468	6.77E-22	1.00E-20	520	520
GAS5	0.404491705	6.87E-22	1.01E-20	520	520
BOD1	0.404297783	7.21E-22	1.06E-20	520	520
CBX8	0.404218502	7.36E-22	1.08E-20	520	520
CCDC12	0.403901526	7.97E-22	1.17E-20	520	520
PRR3	0.403431345	8.98E-22	1.32E-20	520	520
MRPS18A	0.40325432	9.39E-22	1.38E-20	520	520
PIN4	0.40288001	1.03E-21	1.51E-20	520	520
UBE2M	0.402839813	1.04E-21	1.52E-20	520	520
RNASEH2B	0.402668903	1.09E-21	1.59E-20	520	520
WDR73	0.40262327	1.10E-21	1.60E-20	520	520
OR2B6	0.402505337	1.13E-21	1.65E-20	520	366
MRPL27	0.402287338	1.20E-21	1.74E-20	520	520
LPAR2	0.402099509	1.25E-21	1.82E-20	520	520
C17orf89	0.402078382	1.26E-21	1.83E-20	520	520
FAM58A	0.401682779	1.39E-21	2.01E-20	520	520
WDR76	0.401529347	1.45E-21	2.09E-20	520	520
CNTROB	0.401525891	1.45E-21	2.09E-20	520	520
LETMD1	0.401478179	1.47E-21	2.11E-20	520	520
NOXO1	0.401110202	1.61E-21	2.31E-20	520	520
RPS19BP1	0.401048331	1.63E-21	2.34E-20	520	520
LOC338799	0.400952115	1.67E-21	2.40E-20	520	520
C17orf37	0.400793981	1.74E-21	2.49E-20	520	520
C8orf44	0.400681728	1.79E-21	2.56E-20	520	520
NDUFA7	0.400672451	1.79E-21	2.56E-20	520	520
GSS	0.400549061	1.85E-21	2.64E-20	520	520
PCP2	0.400415856	1.91E-21	2.72E-20	520	461
PHPT1	0.40032531	1.96E-21	2.78E-20	520	520
C22orf40	0.400320381	1.96E-21	2.78E-20	520	520
SUPV3L1	0.400170334	2.03E-21	2.88E-20	520	520
POLR1C	0.399979031	2.13E-21	3.00E-20	520	520
MIR17HG	0.399833118	2.21E-21	3.11E-20	520	518
TIMM9	0.399711802	2.28E-21	3.21E-20	520	520
CEP78	0.399663907	2.31E-21	3.24E-20	520	520
LOC650368	0.399503938	2.40E-21	3.37E-20	520	520
CREB3L4	0.399046144	2.69E-21	3.76E-20	520	520
SOD1	0.398869568	2.81E-21	3.92E-20	520	520
PSMA2	0.398753158	2.89E-21	4.03E-20	520	520
NUBP1	0.398273662	3.26E-21	4.52E-20	520	520
UCK1	0.398226176	3.30E-21	4.56E-20	520	520
C16orf68	0.398210857	3.31E-21	4.57E-20	520	520
ZNF414	0.398094294	3.40E-21	4.70E-20	520	520
BUB1B	0.398073291	3.42E-21	4.72E-20	520	520
GLRX5	0.398055522	3.44E-21	4.73E-20	520	520
CTRL	0.397968719	3.51E-21	4.83E-20	520	520
BCCIP	0.39794559	3.53E-21	4.86E-20	520	520
TUT1	0.39790367	3.57E-21	4.90E-20	520	520
DLGAP5	0.397813875	3.65E-21	5.00E-20	520	520
ERI3	0.397778389	3.68E-21	5.04E-20	520	520
ATP5J2	0.397479489	3.96E-21	5.41E-20	520	520
MRPL40	0.397347918	4.09E-21	5.58E-20	520	520
CISD3	0.39724635	4.20E-21	5.72E-20	520	520
COX7C	0.397083147	4.37E-21	5.94E-20	520	520
NUDT5	0.397044478	4.41E-21	5.99E-20	520	520
MFSD2B	0.396943328	4.52E-21	6.13E-20	520	520
CCNA2	0.396893521	4.58E-21	6.20E-20	520	520
ATG4B	0.39683629	4.65E-21	6.28E-20	520	520
MRPS7	0.396735481	4.76E-21	6.43E-20	520	520
PIPSL	0.39671668	4.78E-21	6.45E-20	520	520
FLYWCH2	0.396595799	4.93E-21	6.63E-20	520	520
SHFM1	0.396528582	5.01E-21	6.74E-20	520	520
HPDL	0.396506743	5.04E-21	6.77E-20	520	520
NDUFB6	0.396475233	5.08E-21	6.82E-20	520	520
C19orf54	0.396446955	5.11E-21	6.86E-20	520	520
TLCD1	0.396294291	5.31E-21	7.11E-20	520	520
PRC1	0.396095188	5.57E-21	7.45E-20	520	520
DDTL	0.39601077	5.69E-21	7.60E-20	520	520
RPS27A	0.395944803	5.78E-21	7.72E-20	520	520
NCRNA00105	0.395765897	6.04E-21	8.06E-20	520	520
C19orf25	0.395745022	6.08E-21	8.09E-20	520	520
C7orf27	0.395431634	6.56E-21	8.71E-20	520	520
FAM156A	0.395407687	6.60E-21	8.76E-20	520	520
DHX34	0.395259483	6.84E-21	9.06E-20	520	520
CLN3	0.39522406	6.90E-21	9.13E-20	520	520
SUV39H2	0.395039759	7.22E-21	9.54E-20	520	520
MRTO4	0.395005413	7.28E-21	9.61E-20	520	520
LOC728758	0.394923654	7.43E-21	9.79E-20	520	520
D2HGDH	0.394921597	7.43E-21	9.79E-20	520	520
TRAF4	0.394921315	7.44E-21	9.79E-20	520	520
DDT	0.394897343	7.48E-21	9.84E-20	520	520
DOM3Z	0.394821177	7.62E-21	1.00E-19	520	520
CPSF3L	0.394797515	7.66E-21	1.01E-19	520	520
FTSJ2	0.394675862	7.90E-21	1.04E-19	520	520
RP9P	0.394155998	8.97E-21	1.18E-19	520	520
SLC25A14	0.393993703	9.33E-21	1.22E-19	520	520
AARSD1	0.393974339	9.37E-21	1.22E-19	520	520
COQ7	0.393801431	9.78E-21	1.28E-19	520	520
JTB	0.393182879	1.14E-20	1.48E-19	520	520
HSD17B10	0.393069692	1.17E-20	1.52E-19	520	520
LOC388796	0.393009273	1.19E-20	1.54E-19	520	520
SF3B14	0.39299651	1.19E-20	1.54E-19	520	520
CBWD2	0.392926596	1.21E-20	1.57E-19	520	520
QPCTL	0.392923105	1.21E-20	1.57E-19	520	520
CDCA2	0.392873358	1.23E-20	1.59E-19	520	520
SLC25A10	0.392852851	1.23E-20	1.59E-19	520	520
C7orf30	0.392759146	1.26E-20	1.63E-19	520	520
RPS15	0.392360014	1.39E-20	1.79E-19	520	520
GPR172B	0.392258285	1.42E-20	1.83E-19	520	520
NUDT8	0.391944201	1.54E-20	1.97E-19	520	520
METTL11A	0.391921841	1.54E-20	1.98E-19	520	520
BUB3	0.39181592	1.58E-20	2.03E-19	520	520
PSMB7	0.391686079	1.63E-20	2.09E-19	520	520
MTG1	0.391641823	1.65E-20	2.11E-19	520	520
THOC3	0.391584988	1.68E-20	2.14E-19	520	520
ENDOG	0.391538118	1.69E-20	2.16E-19	520	520
ADRM1	0.391434987	1.74E-20	2.21E-19	520	520
SDHB	0.391160701	1.86E-20	2.36E-19	520	520
RBBP7	0.391064023	1.90E-20	2.41E-19	520	520
NIF3L1	0.390993917	1.93E-20	2.45E-19	520	520
RHBDD3	0.390984144	1.94E-20	2.46E-19	520	520
MRPS14	0.390809877	2.02E-20	2.55E-19	520	520
NUP93	0.39075244	2.05E-20	2.59E-19	520	520
NDUFB9	0.390536725	2.16E-20	2.72E-19	520	520
AIP	0.39038553	2.24E-20	2.82E-19	520	520
TCF19	0.39037173	2.25E-20	2.83E-19	520	520
DDB2	0.390145764	2.37E-20	2.98E-19	520	520
TYSND1	0.389939453	2.49E-20	3.12E-19	520	520
LOC100129637	0.389910795	2.51E-20	3.14E-19	520	520
GOLGA2B	0.389906239	2.51E-20	3.15E-19	520	520
CCDC28A	0.389869706	2.53E-20	3.17E-19	520	520
MRPL54	0.389858905	2.54E-20	3.18E-19	520	520
ASB6	0.38963865	2.68E-20	3.35E-19	520	520
SCARNA12	0.389551117	2.74E-20	3.42E-19	520	506
SLC4A5	0.389471778	2.79E-20	3.48E-19	520	520
MBD3	0.389068659	3.07E-20	3.83E-19	520	520
DOHH	0.389020973	3.11E-20	3.87E-19	520	520
GLI4	0.388995337	3.13E-20	3.89E-19	520	520
RPS10	0.388883121	3.21E-20	3.99E-19	520	520
C17orf65	0.388832069	3.25E-20	4.03E-19	520	520
RPS20	0.388796014	3.28E-20	4.06E-19	520	520
NOL7	0.388648643	3.40E-20	4.20E-19	520	520
RPS27	0.38862176	3.42E-20	4.23E-19	520	520
SGK494	0.388575392	3.46E-20	4.27E-19	520	520
ZNF367	0.3884986	3.52E-20	4.35E-19	520	520
LOC728554	0.388490893	3.53E-20	4.35E-19	520	520
EGFL8	0.388417763	3.59E-20	4.43E-19	520	520
SFRS8	0.388092608	3.88E-20	4.78E-19	520	520
MRM1	0.388062927	3.91E-20	4.81E-19	520	520
RHPN1	0.387954627	4.01E-20	4.93E-19	520	520
PTTG2	0.387865962	4.10E-20	5.03E-19	520	518
RPS10P7	0.387775566	4.19E-20	5.14E-19	520	520
HDDC3	0.387669739	4.29E-20	5.26E-19	520	520
EHMT2	0.387640165	4.32E-20	5.30E-19	520	520
NIT2	0.387634146	4.33E-20	5.30E-19	520	520
TMEM42	0.387595346	4.37E-20	5.35E-19	520	520
RBM8A	0.387588705	4.38E-20	5.35E-19	520	520
RNASEH2C	0.387530936	4.44E-20	5.42E-19	520	520
LOC401052	0.38743809	4.54E-20	5.54E-19	520	520
EIF2S2	0.387415178	4.56E-20	5.57E-19	520	520
YEATS4	0.387340374	4.65E-20	5.66E-19	520	520
ZNF767	0.387337333	4.65E-20	5.66E-19	520	520
TTK	0.387054409	4.97E-20	6.05E-19	520	520
DONSON	0.386992467	5.05E-20	6.13E-19	520	520
UNG	0.386784947	5.30E-20	6.43E-19	520	520
PRPF6	0.38665627	5.47E-20	6.62E-19	520	520
BAT4	0.38646969	5.72E-20	6.90E-19	520	520
POLR2D	0.38642783	5.77E-20	6.97E-19	520	520
FAM96B	0.386426327	5.78E-20	6.97E-19	520	520
RABEP2	0.386371405	5.85E-20	7.05E-19	520	520
C8orf38	0.386270884	5.99E-20	7.21E-19	520	520
PPP1R16A	0.386231539	6.05E-20	7.27E-19	520	520
SDHAP3	0.386186742	6.11E-20	7.34E-19	520	520
C3orf47	0.386179262	6.13E-20	7.35E-19	520	520
FBXL6	0.385911576	6.53E-20	7.83E-19	520	520
FGF17	0.385709806	6.85E-20	8.19E-19	520	342
HIST1H1B	0.385703294	6.86E-20	8.20E-19	520	512
PARL	0.385553822	7.11E-20	8.47E-19	520	520
ATXN7L2	0.385496676	7.20E-20	8.58E-19	520	520
C9orf78	0.385253436	7.63E-20	9.07E-19	520	520
C3orf26	0.385160918	7.80E-20	9.26E-19	520	520
MRPL21	0.385102755	7.91E-20	9.38E-19	520	520
TNFRSF25	0.385078056	7.95E-20	9.42E-19	520	520
ISCA2	0.385064143	7.98E-20	9.45E-19	520	520
MEA1	0.385034765	8.04E-20	9.50E-19	520	520
KNTC1	0.385006938	8.09E-20	9.56E-19	520	520
KIF11	0.384923378	8.25E-20	9.74E-19	520	520
PHB2	0.384662051	8.78E-20	1.03E-18	520	520
FAM104B	0.384623218	8.86E-20	1.04E-18	520	520
PSMA3	0.384622591	8.86E-20	1.04E-18	520	520
EXOSC1	0.384465914	9.19E-20	1.08E-18	520	520
PVT1	0.384377019	9.39E-20	1.10E-18	520	520
NFKBIB	0.384331828	9.49E-20	1.11E-18	520	520
CCDC42B	0.384319116	9.52E-20	1.12E-18	520	517
SH2B1	0.384243774	9.69E-20	1.14E-18	520	520
TAF15	0.384216239	9.75E-20	1.14E-18	520	520
RPUSD3	0.383936933	1.04E-19	1.22E-18	520	520
LOC645676	0.383885493	1.05E-19	1.23E-18	520	520
TRIAP1	0.38377416	1.08E-19	1.26E-18	520	520
PIGQ	0.383724106	1.10E-19	1.28E-18	520	520
TMEM177	0.383667438	1.11E-19	1.29E-18	520	520
DEK	0.38348265	1.16E-19	1.35E-18	520	520
C7orf59	0.383308755	1.21E-19	1.40E-18	520	520
APOM	0.383244686	1.23E-19	1.42E-18	520	520
ANAPC11	0.383234906	1.23E-19	1.43E-18	520	520
CLPP	0.383216642	1.23E-19	1.43E-18	520	520
TMEM161A	0.383213322	1.23E-19	1.43E-18	520	520
TOR2A	0.383132562	1.26E-19	1.46E-18	520	520
UBXN1	0.383087847	1.27E-19	1.47E-18	520	520
ESPL1	0.3828427	1.35E-19	1.56E-18	520	520
CROCC	0.382607104	1.42E-19	1.64E-18	520	520
NHP2L1	0.382583892	1.43E-19	1.65E-18	520	520
PTGES3	0.38256458	1.44E-19	1.66E-18	520	520
PFDN2	0.382560195	1.44E-19	1.66E-18	520	520
TMEM93	0.382559801	1.44E-19	1.66E-18	520	520
C16orf42	0.382454929	1.48E-19	1.70E-18	520	520
ERP29	0.382442628	1.48E-19	1.70E-18	520	520
ATHL1	0.382429968	1.48E-19	1.70E-18	520	520
UBL7	0.382422615	1.49E-19	1.71E-18	520	520
B9D2	0.382391161	1.50E-19	1.72E-18	520	520
REC8	0.382377567	1.50E-19	1.72E-18	520	520
NCRNA00219	0.382306449	1.53E-19	1.75E-18	520	520
SSBP4	0.382142674	1.59E-19	1.82E-18	520	520
ZNHIT2	0.382138442	1.59E-19	1.82E-18	520	404
AURKAPS1	0.382121073	1.60E-19	1.82E-18	520	520
RECQL5	0.382093412	1.61E-19	1.84E-18	520	520
C17orf79	0.382081456	1.61E-19	1.84E-18	520	520
RPL39	0.382046795	1.62E-19	1.85E-18	520	520
SUMO1	0.381869301	1.69E-19	1.93E-18	520	520
RNF5	0.381850793	1.70E-19	1.94E-18	520	520
CECR5	0.381797423	1.72E-19	1.96E-18	520	520
NFKBIL1	0.38179078	1.72E-19	1.96E-18	520	520
CHKB-CPT1B	0.381735833	1.75E-19	1.99E-18	520	520
NUP107	0.381520065	1.84E-19	2.08E-18	520	520
ZNF497	0.381063251	2.04E-19	2.31E-18	520	520
NDUFB1	0.380986476	2.08E-19	2.35E-18	520	520
HIST1H3G	0.380874006	2.14E-19	2.41E-18	520	509
C9orf23	0.38084625	2.15E-19	2.42E-18	520	520
FAM186A	0.380846233	2.15E-19	2.42E-18	520	468
HNRNPC	0.380649303	2.25E-19	2.53E-18	520	520
GPS2	0.380494986	2.33E-19	2.63E-18	520	520
NARF	0.38019806	2.50E-19	2.81E-18	520	520
XPA	0.380080464	2.57E-19	2.89E-18	520	520
UPF3B	0.380034498	2.60E-19	2.91E-18	520	520
CCT7	0.380029172	2.60E-19	2.92E-18	520	520
RNF181	0.379911048	2.67E-19	2.99E-18	520	520
C9orf40	0.379898121	2.68E-19	3.00E-18	520	520
HMGN3	0.379693344	2.81E-19	3.14E-18	520	520
CAPN10	0.379674848	2.82E-19	3.15E-18	520	520
PLK4	0.3794622	2.97E-19	3.31E-18	520	520
MRPL53	0.379331331	3.06E-19	3.41E-18	520	520
MRPL35	0.379253406	3.11E-19	3.46E-18	520	520
SRRM5	0.379215009	3.14E-19	3.49E-18	520	520
C5orf34	0.37920133	3.15E-19	3.50E-18	520	519
CDK2AP2	0.379098848	3.23E-19	3.58E-18	520	520
C12orf32	0.379062281	3.26E-19	3.61E-18	520	520
ACBD7	0.379060163	3.26E-19	3.61E-18	520	519
GINS3	0.378785444	3.47E-19	3.84E-18	520	520
REXO4	0.378621813	3.61E-19	3.98E-18	520	520
CNPY2	0.378617199	3.61E-19	3.98E-18	520	520
C16orf48	0.378592929	3.63E-19	4.00E-18	520	520
RP9	0.378527228	3.69E-19	4.06E-18	520	520
VPS25	0.378189009	3.99E-19	4.38E-18	520	520
C6orf203	0.378146025	4.03E-19	4.43E-18	520	520
FXN	0.378062446	4.10E-19	4.50E-18	520	520
SDHAP1	0.377994363	4.17E-19	4.57E-18	520	520
COX6B1	0.37794828	4.21E-19	4.62E-18	520	520
PDCL3	0.377906411	4.25E-19	4.66E-18	520	520
PFDN5	0.377903739	4.26E-19	4.66E-18	520	520
C14orf166	0.37784667	4.31E-19	4.71E-18	520	520
COQ5	0.377709077	4.45E-19	4.86E-18	520	520
LRRC14	0.377677689	4.49E-19	4.89E-18	520	520
GPN3	0.377343882	4.84E-19	5.28E-18	520	520
PPM1J	0.377266651	4.93E-19	5.37E-18	520	520
ANKZF1	0.377258	4.94E-19	5.38E-18	520	520
KREMEN2	0.377068037	5.16E-19	5.60E-18	520	520
SGOL1	0.37700867	5.23E-19	5.67E-18	520	520
U2AF1L4	0.376968643	5.28E-19	5.72E-18	520	520
TCAM1P	0.37671641	5.60E-19	6.06E-18	520	436
LRP5L	0.376697455	5.62E-19	6.08E-18	520	519
CCT4	0.376593564	5.76E-19	6.22E-18	520	520
SLC25A33	0.376365901	6.07E-19	6.55E-18	520	520
C17orf86	0.376287155	6.18E-19	6.65E-18	520	520
POLQ	0.376154155	6.37E-19	6.85E-18	520	520
COX7A2	0.376051606	6.52E-19	7.00E-18	520	520
COX8A	0.376035932	6.54E-19	7.02E-18	520	520
SF3B5	0.376014839	6.58E-19	7.05E-18	520	520
NUP62CL	0.375994052	6.61E-19	7.08E-18	520	520
RPS7	0.37593409	6.70E-19	7.17E-18	520	520
LOC100130557	0.375857646	6.82E-19	7.29E-18	520	518
BUD31	0.375798836	6.91E-19	7.39E-18	520	520
PROCA1	0.375683987	7.09E-19	7.58E-18	520	518
DHDH	0.375611663	7.21E-19	7.70E-18	520	520
RACGAP1P	0.375574309	7.27E-19	7.76E-18	520	515
C2CD4D	0.375505994	7.39E-19	7.87E-18	520	518
RPL19	0.375234877	7.86E-19	8.35E-18	520	520
ATP5O	0.37520849	7.91E-19	8.40E-18	520	520
HTRA2	0.375194187	7.94E-19	8.42E-18	520	520
NMRAL1	0.375110854	8.09E-19	8.58E-18	520	520
PSMC3	0.374952263	8.39E-19	8.88E-18	520	520
HNRPDL	0.374853731	8.58E-19	9.08E-18	520	520
TSEN2	0.374818052	8.65E-19	9.15E-18	520	520
TIMELESS	0.374710748	8.86E-19	9.37E-18	520	520
C1orf66	0.374630935	9.03E-19	9.54E-18	520	520
RRM2	0.374571194	9.15E-19	9.67E-18	520	520
TBCA	0.374539847	9.22E-19	9.73E-18	520	520
PPP2R3B	0.374298939	9.74E-19	1.02E-17	520	520
FAM86A	0.374229458	9.89E-19	1.04E-17	520	520
UCN	0.374124443	1.01E-18	1.06E-17	520	483
BREA2	0.373931395	1.06E-18	1.11E-17	520	503
BIN3	0.37386444	1.08E-18	1.13E-17	520	520
CHCHD10	0.373778853	1.10E-18	1.15E-17	520	520
ANAPC2	0.373579924	1.15E-18	1.20E-17	520	520
PA2G4	0.373566728	1.15E-18	1.20E-17	520	520
FPGS	0.373478981	1.17E-18	1.23E-17	520	520
PDXP	0.373454135	1.18E-18	1.23E-17	520	520
NDUFS4	0.373203383	1.25E-18	1.30E-17	520	520
USE1	0.373169974	1.26E-18	1.31E-17	520	520
SET	0.373081632	1.28E-18	1.34E-17	520	520
SIGIRR	0.373058662	1.29E-18	1.34E-17	520	520
AURKAIP1	0.372748497	1.39E-18	1.44E-17	520	520
C6orf108	0.372713469	1.40E-18	1.45E-17	520	520
TBL3	0.372632931	1.42E-18	1.47E-17	520	520
RPL36	0.372493092	1.47E-18	1.52E-17	520	520
FANCB	0.372482392	1.47E-18	1.52E-17	520	520
FBRSL1	0.37235691	1.51E-18	1.56E-17	520	520
C20orf7	0.372336641	1.52E-18	1.57E-17	520	520
C17orf49	0.372231902	1.56E-18	1.60E-17	520	520
RNF113A	0.372174394	1.58E-18	1.62E-17	520	520
SMYD5	0.372133887	1.59E-18	1.64E-17	520	520
CENPJ	0.372086516	1.61E-18	1.65E-17	520	520
NUDT6	0.371990656	1.64E-18	1.69E-17	520	520
STXBP2	0.371917202	1.67E-18	1.72E-17	520	520
NDUFA11	0.371848652	1.70E-18	1.74E-17	520	520
TMEM60	0.371830415	1.71E-18	1.75E-17	520	520
ZNF580	0.371802433	1.72E-18	1.76E-17	520	520
KRT18	0.371664056	1.77E-18	1.81E-17	520	520
SNUPN	0.371658777	1.77E-18	1.81E-17	520	520
CMC1	0.371625493	1.79E-18	1.83E-17	520	520
SFPQ	0.371618767	1.79E-18	1.83E-17	520	520
CCT6P1	0.371521347	1.83E-18	1.87E-17	520	520
TRA2B	0.371425383	1.87E-18	1.91E-17	520	520
ZNF446	0.371383178	1.89E-18	1.92E-17	520	520
PSMB1	0.3712878	1.93E-18	1.96E-17	520	520
GSDMB	0.371186591	1.97E-18	2.00E-17	520	520
ATG4D	0.371174132	1.98E-18	2.01E-17	520	520
FARSA	0.371160907	1.98E-18	2.01E-17	520	520
POLR2J	0.371061116	2.03E-18	2.06E-17	520	520
LOC541473	0.371027985	2.04E-18	2.07E-17	520	512
FRG1	0.370902136	2.10E-18	2.13E-17	520	520
EIF2B5	0.370824799	2.14E-18	2.16E-17	520	520
TRIM11	0.370634964	2.23E-18	2.25E-17	520	520
NAT9	0.37058499	2.26E-18	2.28E-17	520	520
SLC2A8	0.370539864	2.28E-18	2.30E-17	520	520
WDYHV1	0.370497342	2.30E-18	2.32E-17	520	520
MST1P9	0.370476651	2.31E-18	2.33E-17	520	514
ATP5D	0.370276346	2.42E-18	2.43E-17	520	520
TSR2	0.370230778	2.45E-18	2.46E-17	520	520
ENY2	0.37012305	2.51E-18	2.51E-17	520	520
TXNL4B	0.370105719	2.52E-18	2.52E-17	520	520
MRPL14	0.370100675	2.52E-18	2.52E-17	520	520
SAP30BP	0.369772062	2.71E-18	2.71E-17	520	520
NAA10	0.369740205	2.73E-18	2.73E-17	520	520
CCDC84	0.369672193	2.77E-18	2.77E-17	520	520
LMNB2	0.36949268	2.89E-18	2.88E-17	520	520
ZNF593	0.369307148	3.01E-18	3.00E-17	520	520
CETN3	0.368898934	3.30E-18	3.28E-17	520	520
PSMC1	0.368788091	3.38E-18	3.36E-17	520	520
AKR7A3	0.368712213	3.44E-18	3.41E-17	520	519
ATPIF1	0.368557651	3.56E-18	3.53E-17	520	520
ERH	0.368418541	3.67E-18	3.63E-17	520	520
PPP5C	0.368250682	3.81E-18	3.77E-17	520	520
RSL1D1	0.368085408	3.96E-18	3.91E-17	520	520
DNM1P35	0.36802609	4.01E-18	3.95E-17	520	519
NPW	0.367892875	4.13E-18	4.07E-17	520	510
PDF	0.367738605	4.27E-18	4.20E-17	520	520
C12orf62	0.367575486	4.43E-18	4.36E-17	520	520
MNS1	0.367481611	4.53E-18	4.45E-17	520	519
CCDC137	0.367384619	4.63E-18	4.54E-17	520	520
EMG1	0.367362936	4.65E-18	4.56E-17	520	520
C1orf174	0.367273147	4.74E-18	4.64E-17	520	520
MAD2L2	0.367250779	4.77E-18	4.66E-17	520	520
CUEDC2	0.367229282	4.79E-18	4.68E-17	520	520
NPRL2	0.367156629	4.87E-18	4.75E-17	520	520
DDIT3	0.366979823	5.06E-18	4.94E-17	520	520
ACTR5	0.366900215	5.15E-18	5.02E-17	520	520
MELK	0.366862723	5.19E-18	5.06E-17	520	520
CDCA7L	0.366805721	5.26E-18	5.12E-17	520	520
B3GNTL1	0.366665148	5.43E-18	5.28E-17	520	520
PSME2	0.366578109	5.53E-18	5.38E-17	520	520
RBM34	0.366425933	5.72E-18	5.56E-17	520	520
COQ2	0.366406638	5.75E-18	5.58E-17	520	520
MTA2	0.366371732	5.79E-18	5.62E-17	520	520
LOC399815	0.366367742	5.80E-18	5.62E-17	520	488
DPH5	0.366365556	5.80E-18	5.62E-17	520	520
C20orf72	0.366337251	5.84E-18	5.65E-17	520	520
SYF2	0.366270974	5.92E-18	5.73E-17	520	520
NDUFB5	0.366229033	5.98E-18	5.78E-17	520	520
LOC148413	0.365990442	6.30E-18	6.09E-17	520	520
TRIP13	0.365974921	6.33E-18	6.11E-17	520	520
ENGASE	0.365846401	6.51E-18	6.27E-17	520	520
CCDC61	0.365835589	6.52E-18	6.28E-17	520	520
KRTCAP2	0.365769698	6.62E-18	6.37E-17	520	520
KLF1	0.365683406	6.75E-18	6.48E-17	520	460
NUDT16L1	0.365568251	6.92E-18	6.64E-17	520	520
PTRH2	0.365518028	7.00E-18	6.71E-17	520	520
C15orf61	0.365456514	7.09E-18	6.80E-17	520	520
TAF1C	0.365216535	7.48E-18	7.15E-17	520	520
FAM193B	0.365215965	7.48E-18	7.15E-17	520	520
POLRMT	0.365196409	7.51E-18	7.18E-17	520	520
ABHD10	0.365128638	7.63E-18	7.28E-17	520	520
FAM100B	0.364989863	7.87E-18	7.51E-17	520	520
LOC100128292	0.36494794	7.94E-18	7.57E-17	520	520
SSRP1	0.364769107	8.26E-18	7.87E-17	520	520
LOC440944	0.364673297	8.43E-18	8.03E-17	520	520
TMEM18	0.364409068	8.94E-18	8.50E-17	520	520
TCTEX1D2	0.364384761	8.99E-18	8.54E-17	520	520
C9orf156	0.364359747	9.04E-18	8.58E-17	520	520
THUMPD2	0.364351843	9.05E-18	8.60E-17	520	520
ADAT2	0.364307094	9.14E-18	8.67E-17	520	520
ECE2	0.364060312	9.65E-18	9.15E-17	520	520
FIZ1	0.364048331	9.68E-18	9.17E-17	520	520
UQCRQ	0.363890266	1.00E-17	9.47E-17	520	520
MPV17L2	0.36387137	1.01E-17	9.50E-17	520	520
NACA2	0.363755962	1.03E-17	9.74E-17	520	520
TOMM6	0.363736515	1.04E-17	9.77E-17	520	520
NFYB	0.363718763	1.04E-17	9.81E-17	520	520
GIT1	0.363584513	1.07E-17	1.01E-16	520	520
GRTP1	0.363511397	1.09E-17	1.02E-16	520	520
LIME1	0.363421173	1.11E-17	1.04E-16	520	520
SPDYA	0.363399604	1.12E-17	1.05E-16	520	517
C20orf27	0.36338675	1.12E-17	1.05E-16	520	520
MDH1	0.363358383	1.13E-17	1.06E-16	520	520
C19orf61	0.363100167	1.19E-17	1.12E-16	520	520
NDUFAF2	0.363057223	1.20E-17	1.13E-16	520	520
FAHD2A	0.362876112	1.25E-17	1.17E-16	520	520
PSTK	0.362831787	1.26E-17	1.18E-16	520	520
C8orf77	0.362797199	1.27E-17	1.19E-16	520	501
MAD2L1BP	0.362354508	1.40E-17	1.31E-16	520	520
INPP5E	0.362168786	1.46E-17	1.36E-16	520	520
CIAO1	0.362146028	1.47E-17	1.37E-16	520	520
PPM1N	0.36211006	1.48E-17	1.37E-16	520	520
CCDC23	0.362084034	1.49E-17	1.38E-16	520	520
C9orf119	0.362051758	1.50E-17	1.39E-16	520	520
POLR2G	0.362006766	1.51E-17	1.40E-16	520	520
GPX4	0.361960347	1.53E-17	1.42E-16	520	520
SLC25A29	0.361852857	1.57E-17	1.45E-16	520	520
DYNLT1	0.361697548	1.62E-17	1.50E-16	520	520
BUB1	0.361693966	1.62E-17	1.50E-16	520	520
PNKP	0.361660844	1.63E-17	1.51E-16	520	520
C6orf147	0.361538161	1.68E-17	1.55E-16	520	514
CHCHD7	0.361509704	1.69E-17	1.56E-16	520	520
HAX1	0.361430935	1.72E-17	1.58E-16	520	520
C2orf28	0.361373173	1.74E-17	1.60E-16	520	520
PINX1	0.361323179	1.76E-17	1.62E-16	520	520
LOC151009	0.361135595	1.83E-17	1.68E-16	520	520
NSMCE2	0.361044001	1.87E-17	1.71E-16	520	520
C6orf162	0.360993396	1.89E-17	1.73E-16	520	520
DPCD	0.360857587	1.95E-17	1.78E-16	520	520
SMC4	0.360798445	1.97E-17	1.80E-16	520	520
ARL6IP1	0.360683302	2.02E-17	1.85E-16	520	520
DUS1L	0.360642842	2.04E-17	1.86E-16	520	520
HNRNPA1L2	0.360581442	2.07E-17	1.89E-16	520	520
NPM3	0.359972977	2.36E-17	2.14E-16	520	520
FAU	0.359970055	2.36E-17	2.14E-16	520	520
POLL	0.359717294	2.49E-17	2.26E-16	520	520
RPS29	0.359700426	2.50E-17	2.27E-16	520	520
URM1	0.359483587	2.62E-17	2.37E-16	520	520
CNPY3	0.359360734	2.69E-17	2.43E-16	520	520
C7orf11	0.359333451	2.71E-17	2.45E-16	520	520
JMJD4	0.359263291	2.75E-17	2.48E-16	520	520
C14orf142	0.359165025	2.81E-17	2.53E-16	520	520
BGLAP	0.359155195	2.82E-17	2.54E-16	520	520
UBL4A	0.359154787	2.82E-17	2.54E-16	520	520
ACOT8	0.359030729	2.89E-17	2.60E-16	520	520
NDUFA1	0.358827874	3.02E-17	2.72E-16	520	520
IMP3	0.358455425	3.27E-17	2.94E-16	520	520
TRIM65	0.358358078	3.34E-17	3.00E-16	520	520
FLAD1	0.35834613	3.35E-17	3.01E-16	520	520
MRPL1	0.358309247	3.38E-17	3.03E-16	520	520
C12orf48	0.358192736	3.47E-17	3.10E-16	520	520
RMND1	0.358107116	3.53E-17	3.16E-16	520	520
RPL18	0.358095788	3.54E-17	3.16E-16	520	520
GTSE1	0.357950362	3.65E-17	3.26E-16	520	520
TBRG4	0.357737778	3.82E-17	3.41E-16	520	520
MRPL13	0.357649964	3.90E-17	3.48E-16	520	520
ATP5G2	0.357505996	4.02E-17	3.58E-16	520	520
LY6G5B	0.35732052	4.18E-17	3.72E-16	520	520
TSSC1	0.357283225	4.21E-17	3.75E-16	520	520
SIRT5	0.357268596	4.23E-17	3.76E-16	520	520
USP39	0.357161272	4.33E-17	3.84E-16	520	520
RAVER1	0.357143663	4.34E-17	3.86E-16	520	520
FKBP4	0.35713854	4.35E-17	3.86E-16	520	520
PPIA	0.357126058	4.36E-17	3.87E-16	520	520
PFDN4	0.357011676	4.47E-17	3.96E-16	520	520
MRPL45	0.356972146	4.51E-17	3.99E-16	520	520
RANGRF	0.356937504	4.54E-17	4.02E-16	520	520
RPIA	0.356904607	4.57E-17	4.05E-16	520	520
ANAPC5	0.356881444	4.59E-17	4.07E-16	520	520
DCLRE1C	0.356748312	4.73E-17	4.18E-16	520	520
NUP43	0.356637557	4.84E-17	4.28E-16	520	520
PSMD9	0.356626584	4.85E-17	4.29E-16	520	520
ZNF787	0.356438179	5.05E-17	4.45E-16	520	520
NCRNA00201	0.356300474	5.20E-17	4.59E-16	520	520
RPL39L	0.356215499	5.30E-17	4.67E-16	520	520
TP53I13	0.356164787	5.36E-17	4.71E-16	520	520
ATAD3B	0.356087029	5.45E-17	4.79E-16	520	520
TOR3A	0.356075873	5.46E-17	4.80E-16	520	520
TMEM14B	0.355898194	5.67E-17	4.97E-16	520	520
C1orf156	0.355847323	5.73E-17	5.02E-16	520	520
PSMG1	0.355840992	5.74E-17	5.02E-16	520	520
TPRA1	0.355630277	6.01E-17	5.24E-16	520	520
ARRDC1	0.355524961	6.14E-17	5.36E-16	520	520
SUMO2	0.355367604	6.35E-17	5.54E-16	520	520
MST1	0.355316116	6.42E-17	5.59E-16	520	520
SPRN	0.354793108	7.18E-17	6.25E-16	520	520
FAM113A	0.354599285	7.48E-17	6.50E-16	520	520
C20orf20	0.354579962	7.51E-17	6.52E-16	520	520
LOC147727	0.354557288	7.55E-17	6.55E-16	520	520
ZGPAT	0.354555313	7.55E-17	6.55E-16	520	520
MDP1	0.354441697	7.74E-17	6.71E-16	520	520
TXNL4A	0.354440276	7.74E-17	6.71E-16	520	520
RPL30	0.354401366	7.80E-17	6.76E-16	520	520
RABL2A	0.354273818	8.02E-17	6.94E-16	520	520
C9orf86	0.35426249	8.04E-17	6.95E-16	520	520
MRPS18C	0.354001294	8.50E-17	7.34E-16	520	520
PHOSPHO2	0.353986219	8.52E-17	7.36E-16	520	520
NAT14	0.353969454	8.55E-17	7.38E-16	520	520
ZNF444	0.353820947	8.83E-17	7.60E-16	520	520
SLC29A2	0.353705733	9.05E-17	7.79E-16	520	520
C7orf50	0.353503747	9.44E-17	8.11E-16	520	520
BRCA1	0.35349834	9.45E-17	8.12E-16	520	520
ZBTB8OS	0.353411739	9.63E-17	8.26E-16	520	520
BRIX1	0.353407559	9.64E-17	8.27E-16	520	520
MRPL50	0.353394541	9.66E-17	8.29E-16	520	520
GLOD4	0.353304406	9.85E-17	8.44E-16	520	520
C21orf70	0.353302734	9.85E-17	8.44E-16	520	520
COPS7B	0.353293926	9.87E-17	8.45E-16	520	520
CSAD	0.353212617	1.00E-16	8.60E-16	520	520
LENG1	0.353114579	1.03E-16	8.77E-16	520	520
CDKN2C	0.353035115	1.04E-16	8.92E-16	520	520
NOXA1	0.352899167	1.07E-16	9.17E-16	520	520
C9orf163	0.352893708	1.07E-16	9.18E-16	520	511
C12orf44	0.352886185	1.08E-16	9.19E-16	520	520
C12orf24	0.352768131	1.10E-16	9.41E-16	520	520
C19orf56	0.35273014	1.11E-16	9.48E-16	520	520
CCDC154	0.352638092	1.13E-16	9.65E-16	520	472
TAS2R20	0.352557871	1.15E-16	9.81E-16	520	519
PDCD2L	0.352539053	1.16E-16	9.84E-16	520	520
CCDC18	0.352473778	1.17E-16	9.97E-16	520	520
TIMM8A	0.352417729	1.19E-16	1.01E-15	520	520
RACGAP1	0.352395682	1.19E-16	1.01E-15	520	520
TTF1	0.352349371	1.21E-16	1.02E-15	520	520
HIST1H2BL	0.352319228	1.21E-16	1.03E-15	520	495
RFC3	0.352231117	1.24E-16	1.05E-15	520	520
NOP16	0.352144345	1.26E-16	1.06E-15	520	520
SYNGR3	0.352138519	1.26E-16	1.06E-15	520	519
PEF1	0.352067415	1.28E-16	1.08E-15	520	520
ESCO2	0.352013013	1.29E-16	1.09E-15	520	520
ARHGEF16	0.351903268	1.32E-16	1.12E-15	520	520
CCNB1IP1	0.351806944	1.35E-16	1.14E-15	520	520
DNAJC7	0.351792117	1.36E-16	1.14E-15	520	520
NCRNA00204B	0.351771952	1.36E-16	1.15E-15	520	498
CCNH	0.35176669	1.36E-16	1.15E-15	520	520
HIST1H2AL	0.351746155	1.37E-16	1.15E-15	520	490
GCHFR	0.351718491	1.38E-16	1.16E-15	520	520
SELO	0.351718064	1.38E-16	1.16E-15	520	520
EIF4EBP3	0.351658813	1.39E-16	1.17E-15	520	520
FER1L4	0.35161974	1.41E-16	1.18E-15	520	519
PYCR2	0.351619414	1.41E-16	1.18E-15	520	520
MSH6	0.351618739	1.41E-16	1.18E-15	520	520
GPX1	0.351502651	1.44E-16	1.20E-15	520	520
RPS8	0.351385366	1.48E-16	1.23E-15	520	520
COPS6	0.351305748	1.50E-16	1.25E-15	520	520
FOXM1	0.351279645	1.51E-16	1.26E-15	520	520
MGC12982	0.351228737	1.53E-16	1.27E-15	520	520
DGCR6L	0.351186878	1.54E-16	1.28E-15	520	520
GMDS	0.351175831	1.54E-16	1.29E-15	520	520
JAGN1	0.351104821	1.57E-16	1.30E-15	520	520
POLR2K	0.351002212	1.60E-16	1.33E-15	520	520
ANKRD36	0.350971199	1.61E-16	1.34E-15	520	520
SLC19A1	0.350954102	1.62E-16	1.34E-15	520	520
ATP5C1	0.350942844	1.62E-16	1.35E-15	520	520
C8G	0.350939954	1.62E-16	1.35E-15	520	491
GOLGA8B	0.350939905	1.62E-16	1.35E-15	520	520
CCDC99	0.35063254	1.73E-16	1.43E-15	520	520
NDUFAF4	0.35062118	1.73E-16	1.44E-15	520	520
CCDC28B	0.350463031	1.79E-16	1.48E-15	520	520
LOC729991-MEF2B	0.350383505	1.82E-16	1.51E-15	520	520
CHKA	0.350340335	1.84E-16	1.52E-15	520	520
HSPD1	0.350297365	1.86E-16	1.53E-15	520	520
FAM192A	0.350285161	1.86E-16	1.54E-15	520	520
ZNF296	0.350240995	1.88E-16	1.55E-15	520	520
FN3KRP	0.350050927	1.95E-16	1.61E-15	520	520
ANKRD13B	0.349969622	1.99E-16	1.64E-15	520	520
STX10	0.349844906	2.04E-16	1.68E-15	520	520
COMMD3	0.349772411	2.07E-16	1.70E-15	520	520
UTP18	0.349754273	2.08E-16	1.71E-15	520	520
TIMM13	0.349683642	2.11E-16	1.73E-15	520	520
KLHDC3	0.349517264	2.19E-16	1.79E-15	520	520
APOO	0.349442766	2.22E-16	1.82E-15	520	520
PSMB6	0.349431714	2.23E-16	1.82E-15	520	520
CSNK2B	0.349335332	2.27E-16	1.86E-15	520	520
NME2P1	0.349326251	2.27E-16	1.86E-15	520	520
ODF2	0.349294239	2.29E-16	1.87E-15	520	520
CHCHD5	0.349248324	2.31E-16	1.89E-15	520	520
LOC256880	0.349246608	2.31E-16	1.89E-15	520	463
DCUN1D2	0.349192153	2.34E-16	1.91E-15	520	520
DBF4	0.349099377	2.38E-16	1.95E-15	520	520
LCN12	0.349024459	2.42E-16	1.97E-15	520	420
ALDH16A1	0.348841673	2.52E-16	2.05E-15	520	520
RBM14	0.348821805	2.53E-16	2.05E-15	520	520
SAAL1	0.348795711	2.54E-16	2.06E-15	520	520
LOC440356	0.348793988	2.54E-16	2.06E-15	520	399
RAC3	0.348734559	2.57E-16	2.09E-15	520	520
RPP38	0.348732412	2.57E-16	2.09E-15	520	520
C1orf151	0.348693438	2.60E-16	2.10E-15	520	520
C10orf35	0.348552386	2.67E-16	2.16E-15	520	519
PTPN2	0.348514993	2.69E-16	2.18E-15	520	520
UQCRB	0.348505099	2.70E-16	2.18E-15	520	520
DDX55	0.348468558	2.72E-16	2.20E-15	520	520
SART1	0.348331112	2.80E-16	2.26E-15	520	520
F12	0.34830909	2.81E-16	2.27E-15	520	520
SDHAP2	0.348307242	2.81E-16	2.27E-15	520	520
DNLZ	0.348274642	2.83E-16	2.28E-15	520	520
TREX1	0.348022834	2.98E-16	2.40E-15	520	520
PRSS36	0.347995168	3.00E-16	2.42E-15	520	520
KPNA2	0.3479336	3.04E-16	2.45E-15	520	520
RPL7A	0.347889319	3.07E-16	2.47E-15	520	520
TMED1	0.347718852	3.18E-16	2.55E-15	520	520
CEMP1	0.347576669	3.27E-16	2.63E-15	520	520
SHMT1	0.347499119	3.33E-16	2.67E-15	520	520
ACSF3	0.347458874	3.36E-16	2.69E-15	520	520
RPL22	0.347388473	3.40E-16	2.73E-15	520	520
C12orf57	0.347008341	3.68E-16	2.95E-15	520	520
SPSB2	0.346953523	3.73E-16	2.98E-15	520	520
HYI	0.346916897	3.75E-16	3.01E-15	520	520
LOC339047	0.346876735	3.79E-16	3.03E-15	520	520
MED22	0.346715501	3.91E-16	3.13E-15	520	520
CPSF1	0.346640881	3.98E-16	3.18E-15	520	520
HMMR	0.346588031	4.02E-16	3.21E-15	520	519
C19orf70	0.346479786	4.11E-16	3.28E-15	520	520
GINS4	0.346381497	4.19E-16	3.34E-15	520	520
SOCS1	0.346302291	4.26E-16	3.39E-15	520	520
MTERFD1	0.346199254	4.36E-16	3.46E-15	520	520
ZNF48	0.346081314	4.46E-16	3.54E-15	520	520
ATP5H	0.345969578	4.57E-16	3.63E-15	520	520
C1orf63	0.345908955	4.62E-16	3.67E-15	520	520
MAPKAPK5	0.345838713	4.69E-16	3.72E-15	520	520
KRTCAP3	0.345760136	4.77E-16	3.78E-15	520	520
HDAC8	0.345744562	4.78E-16	3.79E-15	520	520
ZWILCH	0.34564924	4.88E-16	3.86E-15	520	520
GIGYF1	0.3454049	5.13E-16	4.06E-15	520	520
SULT1A2	0.345363722	5.17E-16	4.09E-15	520	517
COASY	0.345141487	5.42E-16	4.27E-15	520	520
MRPL17	0.345135952	5.42E-16	4.27E-15	520	520
NAP1L4	0.345126543	5.43E-16	4.28E-15	520	520
AGAP6	0.345104332	5.46E-16	4.30E-15	520	520
GPS1	0.345069585	5.50E-16	4.33E-15	520	520
THYN1	0.345042956	5.53E-16	4.35E-15	520	520
BAD	0.344997154	5.58E-16	4.39E-15	520	520
TOP3B	0.34481257	5.80E-16	4.56E-15	520	520
HOOK2	0.344775139	5.84E-16	4.59E-15	520	520
KIF23	0.344562035	6.10E-16	4.78E-15	520	520
ELMOD3	0.344491719	6.19E-16	4.85E-15	520	520
ELAVL1	0.344209807	6.56E-16	5.14E-15	520	520
C14orf138	0.344149241	6.64E-16	5.20E-15	520	520
GET4	0.344141177	6.65E-16	5.20E-15	520	520
METTL1	0.344070569	6.75E-16	5.28E-15	520	520
PISD	0.343966307	6.89E-16	5.38E-15	520	520
DNA2	0.343890308	7.00E-16	5.47E-15	520	520
PARK7	0.343652709	7.35E-16	5.73E-15	520	520
DGKZ	0.343550056	7.51E-16	5.85E-15	520	520
POU5F1	0.34353603	7.53E-16	5.86E-15	520	517
MAPK15	0.343439104	7.68E-16	5.97E-15	520	515
MGC70857	0.343360427	7.80E-16	6.06E-15	520	520
WBP1	0.343271144	7.95E-16	6.17E-15	520	520
COX4NB	0.343209824	8.05E-16	6.24E-15	520	520
TGIF2	0.343172734	8.11E-16	6.29E-15	520	520
LOC100128788	0.342655493	9.01E-16	6.98E-15	520	518
MEF2B	0.342514654	9.28E-16	7.17E-15	520	520
LOC150197	0.342290075	9.71E-16	7.50E-15	520	457
TRABD	0.342275209	9.74E-16	7.52E-15	520	520
ZNF75A	0.34219125	9.91E-16	7.65E-15	520	520
COX17	0.342181706	9.93E-16	7.65E-15	520	520
LCAT	0.342176365	9.94E-16	7.66E-15	520	520
CCNL2	0.342133564	1.00E-15	7.72E-15	520	520
EBNA1BP2	0.342129312	1.00E-15	7.72E-15	520	520
LGALS4	0.342065975	1.02E-15	7.82E-15	520	470
SPDYE8P	0.34169681	1.10E-15	8.43E-15	520	520
RPS9	0.341654422	1.11E-15	8.49E-15	520	520
PSMA7	0.341579391	1.12E-15	8.62E-15	520	520
ECHS1	0.341395916	1.16E-15	8.94E-15	520	520
CCS	0.341312186	1.18E-15	9.09E-15	520	520
C15orf40	0.341250732	1.20E-15	9.20E-15	520	520
TTC32	0.341094786	1.24E-15	9.48E-15	520	520
ANKRD39	0.340985333	1.27E-15	9.69E-15	520	520
CSTF3	0.340959552	1.27E-15	9.73E-15	520	520
UBA52	0.340840632	1.30E-15	9.97E-15	520	520
TMEM219	0.340783509	1.32E-15	1.01E-14	520	520
S100A13	0.34061036	1.37E-15	1.04E-14	520	520
DTNB	0.340507947	1.39E-15	1.06E-14	520	520
C2orf79	0.340470474	1.40E-15	1.07E-14	520	520
NOSIP	0.340433327	1.42E-15	1.08E-14	520	520
AHSA2	0.340201583	1.48E-15	1.13E-14	520	520
NDUFS5	0.340086163	1.52E-15	1.15E-14	520	520
TLX2	0.34000632	1.54E-15	1.17E-14	520	422
RPS24	0.339956831	1.56E-15	1.18E-14	520	520
9-Mar	0.339910589	1.57E-15	1.19E-14	520	520
FAM72A	0.339800068	1.61E-15	1.21E-14	520	519
PNCK	0.339628195	1.67E-15	1.26E-14	520	515
C18orf22	0.339603941	1.67E-15	1.26E-14	520	520
SEPHS2	0.339349744	1.76E-15	1.33E-14	520	520
ROBLD3	0.339299298	1.78E-15	1.34E-14	520	520
LENG9	0.33929885	1.78E-15	1.34E-14	520	520
PTOV1	0.33927425	1.79E-15	1.34E-14	520	520
AATF	0.339246584	1.80E-15	1.35E-14	520	520
NCRNA00116	0.339219914	1.81E-15	1.36E-14	520	520
PLAC8L1	0.339193886	1.82E-15	1.36E-14	520	439
LOC91316	0.338918969	1.92E-15	1.44E-14	520	520
MECR	0.338910201	1.92E-15	1.44E-14	520	520
NDUFB8	0.338833407	1.95E-15	1.46E-14	520	520
MAST1	0.338721206	2.00E-15	1.50E-14	520	520
MNAT1	0.338685156	2.01E-15	1.51E-14	520	520
CAPN12	0.338674231	2.02E-15	1.51E-14	520	520
HSPBAP1	0.33864296	2.03E-15	1.52E-14	520	520
FLJ42289	0.338636274	2.03E-15	1.52E-14	520	520
POP4	0.33860935	2.04E-15	1.53E-14	520	520
TSTD1	0.338605537	2.05E-15	1.53E-14	520	520
AIMP1	0.338460303	2.11E-15	1.57E-14	520	520
SNX22	0.338393187	2.14E-15	1.59E-14	520	520
CDKN2D	0.338371723	2.14E-15	1.60E-14	520	520
TMEM52	0.338350344	2.15E-15	1.60E-14	520	520
GNL1	0.338219526	2.21E-15	1.64E-14	520	520
HIST1H3C	0.338203729	2.22E-15	1.65E-14	520	472
RPL23A	0.338195509	2.22E-15	1.65E-14	520	520
NMU	0.33798032	2.32E-15	1.72E-14	520	520
C1orf31	0.337820777	2.40E-15	1.78E-14	520	520
NKAP	0.337719147	2.44E-15	1.81E-14	520	520
C11orf10	0.337680479	2.46E-15	1.82E-14	520	520
VAMP1	0.337673452	2.47E-15	1.82E-14	520	520
ERCC6L	0.337650594	2.48E-15	1.83E-14	520	520
KPTN	0.337517998	2.55E-15	1.88E-14	520	520
AFG3L1	0.337512515	2.55E-15	1.88E-14	520	520
FAM32A	0.33746963	2.57E-15	1.90E-14	520	520
C7orf55	0.33741338	2.60E-15	1.92E-14	520	520
HINT2	0.337275201	2.67E-15	1.97E-14	520	520
SNHG9	0.337237643	2.69E-15	1.98E-14	520	520
NEIL3	0.337040783	2.80E-15	2.06E-14	520	520
TMEM141	0.337011958	2.82E-15	2.07E-14	520	520
GAR1	0.337008352	2.82E-15	2.07E-14	520	520
PCSK4	0.337000927	2.82E-15	2.07E-14	520	519
SNHG8	0.336829784	2.92E-15	2.14E-14	520	520
PASK	0.33680975	2.93E-15	2.15E-14	520	520
ASNA1	0.336774396	2.95E-15	2.16E-14	520	520
IFT20	0.33663887	3.03E-15	2.22E-14	520	520
RPL11	0.336633173	3.04E-15	2.22E-14	520	520
COQ9	0.336565161	3.08E-15	2.25E-14	520	520
RPSAP9	0.33652633	3.10E-15	2.27E-14	520	520
THAP4	0.336507604	3.11E-15	2.27E-14	520	520
WASH5P	0.336470657	3.14E-15	2.29E-14	520	520
ABCB9	0.336452642	3.15E-15	2.30E-14	520	520
PPIEL	0.336422423	3.17E-15	2.31E-14	520	518
NR2F6	0.336420425	3.17E-15	2.31E-14	520	520
ZC3HC1	0.336216161	3.30E-15	2.40E-14	520	520
R3HCC1	0.336212818	3.30E-15	2.40E-14	520	520
COMTD1	0.336205471	3.31E-15	2.41E-14	520	520
RPLP1	0.336198381	3.31E-15	2.41E-14	520	520
EDF1	0.336136699	3.35E-15	2.44E-14	520	520
HNRNPH1	0.336081944	3.39E-15	2.46E-14	520	520
NDUFA10	0.336037707	3.42E-15	2.48E-14	520	520
CCDC90A	0.335847013	3.55E-15	2.58E-14	520	520
DEPDC1	0.335783232	3.60E-15	2.61E-14	520	520
COPS3	0.335761818	3.61E-15	2.62E-14	520	520
UQCR10	0.335737395	3.63E-15	2.63E-14	520	520
STRC	0.335659908	3.69E-15	2.67E-14	520	492
ARHGAP4	0.335602246	3.73E-15	2.70E-14	520	520
ZNF653	0.335562077	3.76E-15	2.72E-14	520	520
MIOX	0.335549105	3.77E-15	2.73E-14	520	382
FDPS	0.335422704	3.87E-15	2.79E-14	520	520
APTX	0.335372849	3.90E-15	2.82E-14	520	520
SFXN2	0.335125116	4.10E-15	2.96E-14	520	520
GSG2	0.335039346	4.17E-15	3.00E-14	520	520
DAND5	0.334988116	4.21E-15	3.03E-14	520	443
POLE4	0.334858146	4.32E-15	3.11E-14	520	520
SASS6	0.334854163	4.33E-15	3.11E-14	520	520
SYNGR4	0.334762253	4.41E-15	3.17E-14	520	451
GTF2A2	0.334724497	4.44E-15	3.19E-14	520	520
C9orf116	0.334716254	4.45E-15	3.19E-14	520	520
HIST1H3I	0.334610459	4.54E-15	3.26E-14	520	348
SRA1	0.334596581	4.55E-15	3.26E-14	520	520
LOC388789	0.334515753	4.63E-15	3.31E-14	520	520
RPS14	0.334464746	4.67E-15	3.34E-14	520	520
GOLGA8A	0.334364033	4.77E-15	3.41E-14	520	520
ADCK5	0.334352454	4.78E-15	3.41E-14	520	520
SEC61B	0.334291832	4.84E-15	3.45E-14	520	520
VPS29	0.334205976	4.92E-15	3.50E-14	520	520
FAM100A	0.33419385	4.93E-15	3.51E-14	520	520
DYNLRB1	0.334182791	4.94E-15	3.52E-14	520	520
FBXO22OS	0.333799994	5.33E-15	3.79E-14	520	520
OAZ1	0.333789881	5.34E-15	3.79E-14	520	520
C1orf172	0.333778338	5.35E-15	3.80E-14	520	520
PNKD	0.333771937	5.36E-15	3.81E-14	520	520
TFB1M	0.33375659	5.38E-15	3.81E-14	520	520
HDGF	0.333610929	5.53E-15	3.92E-14	520	520
ZP3	0.333589045	5.56E-15	3.94E-14	520	520
CFDP1	0.333585845	5.56E-15	3.94E-14	520	520
C21orf119	0.333565469	5.58E-15	3.95E-14	520	520
LOC341056	0.333499896	5.66E-15	4.00E-14	520	520
CDCA4	0.333475232	5.68E-15	4.02E-14	520	520
RRP9	0.333467672	5.69E-15	4.02E-14	520	520
C19orf42	0.333405869	5.76E-15	4.07E-14	520	520
WRNIP1	0.333394795	5.77E-15	4.07E-14	520	520
HADH	0.333361404	5.81E-15	4.10E-14	520	520
DFNB59	0.333286252	5.90E-15	4.16E-14	520	514
RBM6	0.333191349	6.01E-15	4.23E-14	520	520
NDUFA12	0.333084321	6.14E-15	4.32E-14	520	520
METTL5	0.333068582	6.16E-15	4.33E-14	520	520
NUDT3	0.333052274	6.18E-15	4.34E-14	520	520
C19orf6	0.332931342	6.33E-15	4.45E-14	520	520
TOMM22	0.332732519	6.58E-15	4.62E-14	520	520
CRTC2	0.332692222	6.63E-15	4.65E-14	520	520
DECR2	0.332549904	6.82E-15	4.78E-14	520	520
CDK2	0.332461893	6.94E-15	4.86E-14	520	520
ORMDL1	0.33243171	6.98E-15	4.89E-14	520	520
TAF5	0.33241277	7.01E-15	4.91E-14	520	520
AMH	0.332292547	7.17E-15	5.02E-14	520	487
PREB	0.33224748	7.24E-15	5.06E-14	520	520
C19orf53	0.332176837	7.34E-15	5.13E-14	520	520
ATF4	0.33212967	7.41E-15	5.17E-14	520	520
GNMT	0.332061351	7.51E-15	5.24E-14	520	505
C19orf44	0.332047185	7.53E-15	5.25E-14	520	520
BCAS2	0.331669246	8.11E-15	5.64E-14	520	520
UTP6	0.331611874	8.20E-15	5.70E-14	520	520
SULT1A1	0.331321583	8.68E-15	6.02E-14	520	520
TMEM191A	0.331288463	8.73E-15	6.05E-14	520	520
PRIM2	0.331274004	8.76E-15	6.07E-14	520	520
SLC25A41	0.331249183	8.80E-15	6.10E-14	520	442
AGAP7	0.33112914	9.01E-15	6.24E-14	520	518
TRNAU1AP	0.331027516	9.19E-15	6.36E-14	520	520
EDC4	0.330994588	9.25E-15	6.39E-14	520	520
C1orf59	0.330938112	9.35E-15	6.46E-14	520	520
NSUN6	0.330932322	9.36E-15	6.47E-14	520	520
C2orf68	0.330843145	9.53E-15	6.57E-14	520	520
AXIN1	0.330809797	9.59E-15	6.61E-14	520	520
H3F3A	0.330793652	9.62E-15	6.63E-14	520	520
ZNF764	0.330692641	9.81E-15	6.76E-14	520	520
LONP1	0.33068124	9.83E-15	6.77E-14	520	520
GRB7	0.330655104	9.88E-15	6.80E-14	520	520
RPL23	0.330558139	1.01E-14	6.93E-14	520	520
ACAD9	0.330553032	1.01E-14	6.93E-14	520	520
GNB1L	0.330429106	1.03E-14	7.10E-14	520	520
MORN1	0.330118503	1.10E-14	7.52E-14	520	520
RPS17	0.330114094	1.10E-14	7.52E-14	520	520
SAFB2	0.330059523	1.11E-14	7.60E-14	520	520
TBC1D7	0.330049496	1.11E-14	7.61E-14	520	520
PSMA5	0.329978347	1.13E-14	7.71E-14	520	520
CCDC123	0.32992074	1.14E-14	7.79E-14	520	520
SUCLG1	0.3299135	1.14E-14	7.80E-14	520	520
FBXL15	0.32988651	1.15E-14	7.84E-14	520	520
ORAOV1	0.329863602	1.15E-14	7.87E-14	520	520
INPP5B	0.329797645	1.17E-14	7.97E-14	520	520
MYL6B	0.329693341	1.19E-14	8.12E-14	520	520
GPKOW	0.329666279	1.20E-14	8.16E-14	520	520
NLE1	0.329620706	1.21E-14	8.23E-14	520	520
CCDC72	0.329547602	1.23E-14	8.34E-14	520	520
FAM71E1	0.329487228	1.24E-14	8.44E-14	520	520
HES4	0.329439571	1.25E-14	8.51E-14	520	520
RANGAP1	0.32933651	1.28E-14	8.68E-14	520	520
CCDC17	0.329332877	1.28E-14	8.68E-14	520	519
MNX1	0.3292762	1.29E-14	8.77E-14	520	450
RFNG	0.329118862	1.33E-14	9.04E-14	520	520
KIF20A	0.329007474	1.36E-14	9.23E-14	520	520
SYMPK	0.328909976	1.39E-14	9.40E-14	520	520
ARMC7	0.328846152	1.41E-14	9.52E-14	520	520
RABGGTB	0.328692768	1.45E-14	9.79E-14	520	520
PMS2L3	0.328650373	1.46E-14	9.87E-14	520	520
HSD17B7	0.328465767	1.51E-14	1.02E-13	520	520
DDX54	0.328465532	1.51E-14	1.02E-13	520	520
ALG6	0.328412349	1.53E-14	1.03E-13	520	520
HIST1H2BO	0.3284065	1.53E-14	1.03E-13	520	495
C19orf73	0.328308763	1.56E-14	1.05E-13	520	520
HIST1H3F	0.328279573	1.57E-14	1.06E-13	520	465
MIF	0.328186067	1.60E-14	1.08E-13	520	520
APOA1BP	0.327829144	1.71E-14	1.15E-13	520	520
MRPL48	0.327774396	1.73E-14	1.16E-13	520	520
SPIRE2	0.327767227	1.73E-14	1.16E-13	520	520
PSME1	0.327608707	1.79E-14	1.20E-13	520	520
NT5M	0.327604682	1.79E-14	1.20E-13	520	519
RPL32	0.327522318	1.82E-14	1.22E-13	520	520
PUF60	0.32747951	1.83E-14	1.23E-13	520	520
BRP44	0.32731395	1.89E-14	1.26E-13	520	520
GRIN2C	0.327249238	1.91E-14	1.28E-13	520	520
PDSS1	0.327161491	1.95E-14	1.30E-13	520	520
HIST2H3C	0.326761645	2.10E-14	1.40E-13	520	509
FBXO24	0.326736669	2.11E-14	1.41E-13	520	517
ATPAF2	0.326514297	2.20E-14	1.47E-13	520	520
CENPV	0.326513161	2.21E-14	1.47E-13	520	519
CSNK1G2	0.326494072	2.21E-14	1.47E-13	520	520
DRG1	0.32643657	2.24E-14	1.49E-13	520	520
STK16	0.326242826	2.32E-14	1.54E-13	520	520
MASTL	0.32622856	2.33E-14	1.54E-13	520	520
ODF3B	0.326191186	2.35E-14	1.55E-13	520	520
HMX2	0.326128783	2.37E-14	1.57E-13	520	285
TRAPPC6A	0.326109015	2.38E-14	1.58E-13	520	520
C14orf2	0.326070894	2.40E-14	1.59E-13	520	520
IMP4	0.325915859	2.47E-14	1.64E-13	520	520
XRCC6	0.325862063	2.50E-14	1.65E-13	520	520
FAM125A	0.325840471	2.51E-14	1.66E-13	520	520
PPAP2C	0.325834769	2.51E-14	1.66E-13	520	520
IGFALS	0.325736662	2.56E-14	1.69E-13	520	450
ADAT3	0.325692721	2.58E-14	1.70E-13	520	520
SUPT4H1	0.325692	2.58E-14	1.70E-13	520	520
C21orf33	0.325635754	2.61E-14	1.72E-13	520	520
VGF	0.325612619	2.62E-14	1.73E-13	520	511
RPS16	0.325609453	2.62E-14	1.73E-13	520	520
S1PR5	0.325585813	2.63E-14	1.73E-13	520	520
ZNF428	0.32549847	2.68E-14	1.76E-13	520	520
STOML2	0.325462035	2.70E-14	1.77E-13	520	520
FKBPL	0.325455741	2.70E-14	1.77E-13	520	520
RPF1	0.325390103	2.74E-14	1.79E-13	520	520
CTRC	0.325364956	2.75E-14	1.80E-13	520	311
CNOT10	0.325355597	2.75E-14	1.81E-13	520	520
MPG	0.325241613	2.81E-14	1.84E-13	520	520
PEX14	0.325017577	2.94E-14	1.92E-13	520	520
TMEM11	0.324910186	3.00E-14	1.96E-13	520	520
ZFYVE27	0.324773182	3.08E-14	2.01E-13	520	520
HDAC10	0.324728163	3.10E-14	2.03E-13	520	520
RPL13AP3	0.3246737	3.14E-14	2.05E-13	520	520
MPND	0.324659497	3.15E-14	2.05E-13	520	520
CEP72	0.324528202	3.23E-14	2.10E-13	520	520
PICK1	0.324514675	3.23E-14	2.11E-13	520	520
LOC100125556	0.324403052	3.30E-14	2.15E-13	520	520
LIAS	0.324387405	3.31E-14	2.15E-13	520	520
ANP32C	0.324364604	3.33E-14	2.16E-13	520	519
C16orf88	0.324243429	3.41E-14	2.21E-13	520	520
BRD8	0.324228906	3.42E-14	2.22E-13	520	520
KLHL17	0.324220636	3.42E-14	2.22E-13	520	520
ARHGEF19	0.324182359	3.45E-14	2.23E-13	520	520
STUB1	0.324151464	3.47E-14	2.25E-13	520	520
CWC27	0.324143975	3.47E-14	2.25E-13	520	520
SETD1A	0.324097256	3.50E-14	2.27E-13	520	520
C17orf61	0.324068098	3.52E-14	2.28E-13	520	520
MPP3	0.32386168	3.66E-14	2.37E-13	520	520
CKLF	0.323686881	3.79E-14	2.45E-13	520	520
KARS	0.323639015	3.82E-14	2.47E-13	520	520
LOC144486	0.323570891	3.87E-14	2.50E-13	520	514
NPM2	0.323499897	3.92E-14	2.53E-13	520	516
RRP8	0.323480284	3.94E-14	2.54E-13	520	520
C3orf75	0.323417812	3.99E-14	2.57E-13	520	520
WDR24	0.323356612	4.03E-14	2.60E-13	520	520
HYLS1	0.323344679	4.04E-14	2.60E-13	520	520
GOT1	0.32321485	4.14E-14	2.66E-13	520	520
DPM3	0.323145117	4.20E-14	2.70E-13	520	520
MICALL2	0.32311226	4.22E-14	2.71E-13	520	520
NME3	0.323078064	4.25E-14	2.73E-13	520	520
COQ6	0.322968092	4.34E-14	2.79E-13	520	520
P2RY11	0.322807589	4.47E-14	2.87E-13	520	519
C1orf52	0.322799089	4.48E-14	2.87E-13	520	520
CUZD1	0.322652421	4.61E-14	2.95E-13	520	511
FLJ37453	0.322648322	4.61E-14	2.95E-13	520	520
RGS14	0.322596391	4.66E-14	2.98E-13	520	520
PYGO2	0.322357632	4.87E-14	3.12E-13	520	520
CLUAP1	0.322302189	4.92E-14	3.15E-13	520	520
HIST1H3A	0.322253252	4.97E-14	3.18E-13	520	417
TSSK6	0.322234027	4.99E-14	3.19E-13	520	520
TLK2	0.322174086	5.05E-14	3.22E-13	520	520
MGMT	0.322170929	5.05E-14	3.22E-13	520	520
ABHD12	0.322066767	5.15E-14	3.28E-13	520	520
CCDC14	0.321970827	5.24E-14	3.34E-13	520	520
LRRCC1	0.321953495	5.26E-14	3.35E-13	520	520
MRPS28	0.321919648	5.29E-14	3.37E-13	520	520
NR1I3	0.321901114	5.31E-14	3.38E-13	520	520
FRS3	0.321897267	5.32E-14	3.38E-13	520	520
ACBD4	0.321886834	5.33E-14	3.39E-13	520	520
WDR46	0.321862568	5.35E-14	3.40E-13	520	520
C10orf75	0.321628249	5.59E-14	3.55E-13	520	520
ARMC6	0.321622452	5.60E-14	3.55E-13	520	520
PCYT2	0.321443201	5.79E-14	3.67E-13	520	520
RHOXF1	0.321191792	6.07E-14	3.84E-13	520	272
TFPT	0.321105252	6.17E-14	3.90E-13	520	520
LOC389791	0.321045429	6.24E-14	3.95E-13	520	486
EIF3G	0.321033855	6.26E-14	3.95E-13	520	520
FOXH1	0.321028187	6.26E-14	3.96E-13	520	500
ZCCHC3	0.320853738	6.47E-14	4.08E-13	520	520
FOXRED1	0.320845388	6.48E-14	4.09E-13	520	520
RPL36A	0.320785206	6.56E-14	4.13E-13	520	520
CAMK2N2	0.320666201	6.71E-14	4.23E-13	520	520
FBXL8	0.32056807	6.83E-14	4.30E-13	520	520
ATPAF1	0.320398491	7.05E-14	4.44E-13	520	520
POLR2E	0.320232965	7.28E-14	4.57E-13	520	520
ANKRD16	0.32020981	7.31E-14	4.59E-13	520	520
HINT1	0.320207954	7.31E-14	4.59E-13	520	520
C21orf59	0.32012315	7.43E-14	4.66E-13	520	520
UBL5	0.319807548	7.88E-14	4.94E-13	520	520
RFPL3S	0.319748382	7.97E-14	4.99E-13	520	457
TOMM5	0.319729722	8.00E-14	5.01E-13	520	520
ELOF1	0.319699367	8.04E-14	5.04E-13	520	520
COX16	0.319612651	8.17E-14	5.11E-13	520	520
LSM10	0.319592503	8.20E-14	5.13E-13	520	520
PSMA6	0.319547198	8.27E-14	5.17E-13	520	520
LOC254559	0.319506961	8.34E-14	5.21E-13	520	520
RPF2	0.319497181	8.35E-14	5.22E-13	520	520
PCGF1	0.319480346	8.38E-14	5.23E-13	520	520
C19orf29	0.319442119	8.44E-14	5.27E-13	520	520
AFMID	0.319403841	8.50E-14	5.30E-13	520	520
POC5	0.319354812	8.58E-14	5.35E-13	520	520
REEP4	0.319353084	8.58E-14	5.35E-13	520	520
ISCU	0.319255479	8.74E-14	5.45E-13	520	520
RBM22	0.319189116	8.85E-14	5.51E-13	520	520
IQCB1	0.319059386	9.07E-14	5.64E-13	520	520
FAM119A	0.319005123	9.16E-14	5.70E-13	520	520
STAP2	0.318946848	9.26E-14	5.76E-13	520	520
CBS	0.318836184	9.45E-14	5.87E-13	520	520
UQCRFS1	0.318751182	9.60E-14	5.96E-13	520	520
GLE1	0.318583636	9.91E-14	6.15E-13	520	520
DDX56	0.318441922	1.02E-13	6.30E-13	520	520
C22orf32	0.318409194	1.02E-13	6.34E-13	520	520
ZNHIT1	0.31840694	1.02E-13	6.34E-13	520	520
RBX1	0.318373773	1.03E-13	6.38E-13	520	520
SLFN13	0.318360079	1.03E-13	6.39E-13	520	520
RIBC1	0.318218891	1.06E-13	6.56E-13	520	520
EPCAM	0.318060742	1.09E-13	6.75E-13	520	520
SETD6	0.318033601	1.10E-13	6.78E-13	520	520
SGTA	0.317748978	1.16E-13	7.14E-13	520	520
PTMS	0.317730167	1.16E-13	7.16E-13	520	520
BBC3	0.317722403	1.16E-13	7.17E-13	520	520
C9orf43	0.317618218	1.19E-13	7.30E-13	520	519
EIF2B3	0.317506701	1.21E-13	7.45E-13	520	520
DNASE1	0.31740466	1.23E-13	7.59E-13	520	520
ZNF579	0.317307162	1.26E-13	7.72E-13	520	520
UROD	0.317281828	1.26E-13	7.75E-13	520	520
NPEPL1	0.317279005	1.26E-13	7.75E-13	520	520
PDAP1	0.317265143	1.27E-13	7.77E-13	520	520
CEP55	0.317230785	1.27E-13	7.82E-13	520	520
SETD4	0.317224391	1.28E-13	7.82E-13	520	520
ZNF133	0.317218375	1.28E-13	7.83E-13	520	520
EID2B	0.317202402	1.28E-13	7.85E-13	520	520
LY6K	0.317194934	1.28E-13	7.86E-13	520	520
C6orf134	0.317193062	1.28E-13	7.86E-13	520	520
PSMC4	0.31711577	1.30E-13	7.97E-13	520	520
SNORA7B	0.317097128	1.31E-13	7.99E-13	520	498
FASTK	0.316996253	1.33E-13	8.14E-13	520	520
MAP2K2	0.31697291	1.34E-13	8.17E-13	520	520
ZNF519	0.3168881	1.36E-13	8.29E-13	520	518
FAM136A	0.316880283	1.36E-13	8.30E-13	520	520
EFCAB4A	0.316797957	1.38E-13	8.42E-13	520	520
TOP2A	0.316779765	1.39E-13	8.45E-13	520	520
MTBP	0.316725592	1.40E-13	8.53E-13	520	520
C18orf55	0.316661179	1.42E-13	8.63E-13	520	520
SERGEF	0.316641699	1.42E-13	8.66E-13	520	520
TUBB2C	0.316608053	1.43E-13	8.71E-13	520	520
C6orf154	0.31657383	1.44E-13	8.76E-13	520	518
RPL38	0.316397728	1.49E-13	9.04E-13	520	520
MEPCE	0.316340332	1.50E-13	9.13E-13	520	520
ZCWPW1	0.316284392	1.52E-13	9.22E-13	520	520
NME2	0.31623728	1.53E-13	9.30E-13	520	520
GSDMD	0.316027534	1.59E-13	9.66E-13	520	520
IDH3G	0.315998275	1.60E-13	9.71E-13	520	520
TMEM107	0.315952887	1.62E-13	9.79E-13	520	520
C17orf96	0.315838989	1.65E-13	9.99E-13	520	520
RPL5	0.31582265	1.65E-13	1.00E-12	520	520
DPP7	0.315696855	1.69E-13	1.03E-12	520	520
NDUFV2	0.315537316	1.74E-13	1.06E-12	520	520
WFIKKN1	0.315458783	1.77E-13	1.07E-12	520	514
OGG1	0.315422203	1.78E-13	1.08E-12	520	520
UMPS	0.315202656	1.86E-13	1.12E-12	520	520
AMY2B	0.315187111	1.86E-13	1.12E-12	520	518
C2orf56	0.315116955	1.88E-13	1.14E-12	520	520
SCO2	0.315114596	1.89E-13	1.14E-12	520	520
NDUFA4	0.315087187	1.90E-13	1.14E-12	520	520
RAET1K	0.315081255	1.90E-13	1.14E-12	520	510
C1orf69	0.31507875	1.90E-13	1.14E-12	520	520
TAF11	0.314936139	1.95E-13	1.17E-12	520	520
HIST1H4I	0.314919136	1.95E-13	1.17E-12	520	457
FANCE	0.314866366	1.97E-13	1.19E-12	520	520
HMGA1	0.314764984	2.01E-13	1.21E-12	520	520
MYPOP	0.314729245	2.02E-13	1.21E-12	520	520
CCDC22	0.314679746	2.04E-13	1.22E-12	520	520
PMS2L2	0.314655787	2.05E-13	1.23E-12	520	520
ING2	0.314638974	2.06E-13	1.23E-12	520	520
C6orf81	0.314592238	2.08E-13	1.24E-12	520	470
MBD4	0.314427916	2.14E-13	1.28E-12	520	520
RABEPK	0.314355133	2.17E-13	1.30E-12	520	520
ROMO1	0.314298699	2.19E-13	1.31E-12	520	520
ZNF90	0.314257949	2.21E-13	1.32E-12	520	520
HCG27	0.314084497	2.28E-13	1.36E-12	520	510
AMT	0.313934687	2.34E-13	1.40E-12	520	520
VBP1	0.313818013	2.39E-13	1.43E-12	520	520
USMG5	0.313733389	2.43E-13	1.45E-12	520	520
SEC31B	0.313717409	2.44E-13	1.45E-12	520	520
RPL12	0.313693702	2.45E-13	1.46E-12	520	520
TSSC4	0.313670909	2.46E-13	1.46E-12	520	520
COQ10A	0.313649354	2.47E-13	1.47E-12	520	520
CEP70	0.313609058	2.49E-13	1.48E-12	520	520
ZNF346	0.313532486	2.52E-13	1.50E-12	520	520
C6orf52	0.313316254	2.62E-13	1.56E-12	520	509
RAG1AP1	0.313243251	2.66E-13	1.58E-12	520	520
RNF25	0.313170276	2.69E-13	1.60E-12	520	520
CNIH2	0.31314864	2.71E-13	1.60E-12	520	520
B3GALT6	0.31314807	2.71E-13	1.60E-12	520	520
LOC100129534	0.313096588	2.73E-13	1.62E-12	520	517
MTERFD3	0.313068011	2.75E-13	1.62E-12	520	520
GLS2	0.31295361	2.80E-13	1.66E-12	520	520
ACOT4	0.312882112	2.84E-13	1.68E-12	520	520
LIN9	0.312755396	2.91E-13	1.72E-12	520	520
SLC16A11	0.312596685	2.99E-13	1.77E-12	520	518
CCDC104	0.312586165	3.00E-13	1.77E-12	520	520
SLC25A11	0.312516246	3.04E-13	1.79E-12	520	520
ATP8B5P	0.312443032	3.08E-13	1.81E-12	520	520
RPL10	0.312431401	3.08E-13	1.82E-12	520	520
MORN2	0.312400037	3.10E-13	1.83E-12	520	520
PYCRL	0.312363952	3.12E-13	1.84E-12	520	520
IQGAP3	0.312349529	3.13E-13	1.84E-12	520	520
POLDIP2	0.312247262	3.19E-13	1.87E-12	520	520
C11orf35	0.312133524	3.26E-13	1.91E-12	520	519
TMPO	0.312123844	3.26E-13	1.92E-12	520	520
PDDC1	0.312086078	3.28E-13	1.93E-12	520	520
PHGDH	0.312040784	3.31E-13	1.94E-12	520	520
PCBD2	0.311979796	3.35E-13	1.97E-12	520	520
PPP1R12C	0.311881808	3.41E-13	2.00E-12	520	520
KIAA0907	0.311535256	3.63E-13	2.13E-12	520	520
C19orf46	0.311529853	3.63E-13	2.13E-12	520	486
RPS23	0.311519424	3.64E-13	2.13E-12	520	520
RRN3P1	0.311411569	3.71E-13	2.17E-12	520	518
APEX1	0.311354446	3.75E-13	2.19E-12	520	520
MRPL20	0.311267677	3.81E-13	2.23E-12	520	520
RAB26	0.311233735	3.84E-13	2.24E-12	520	519
LCT	0.310958146	4.03E-13	2.35E-12	520	345
ROGDI	0.31095601	4.03E-13	2.35E-12	520	520
UPF3A	0.310822013	4.13E-13	2.41E-12	520	520
NPB	0.310753559	4.18E-13	2.44E-12	520	499
ATAD2	0.310715064	4.21E-13	2.45E-12	520	520
RASSF1	0.310698611	4.23E-13	2.46E-12	520	520
RNFT2	0.310695343	4.23E-13	2.46E-12	520	520
INO80B	0.31067717	4.24E-13	2.47E-12	520	520
[truncated: 18,165 more rows]
