# Supplementary figures and images for: KIF22 in the Prognosis and Immune Biomarking of Pan-Cancer
Source: Hindawi journal article supplement (doi:10.1155/2023/9542311), 2023-05-31

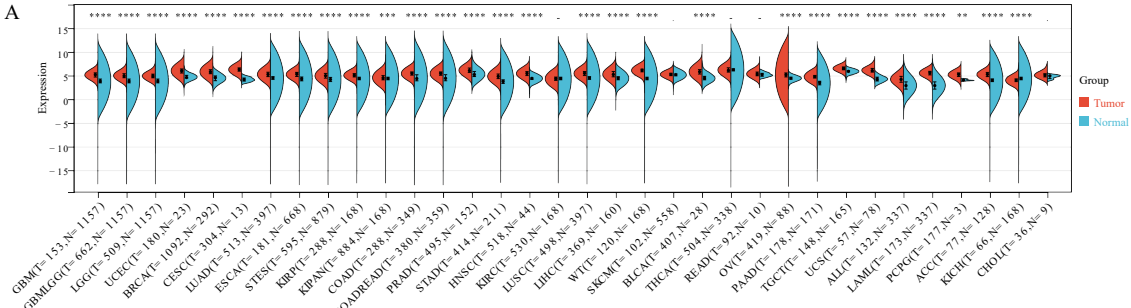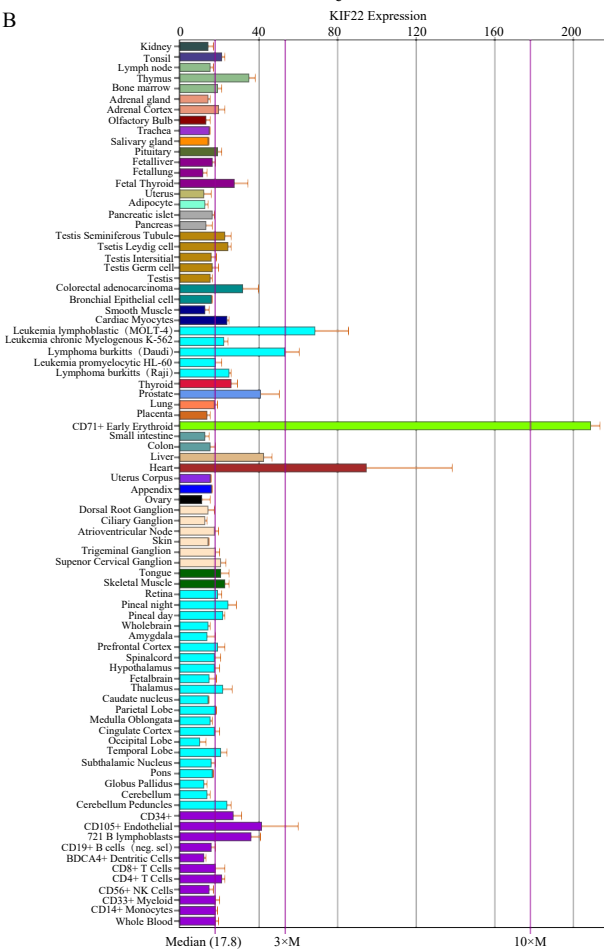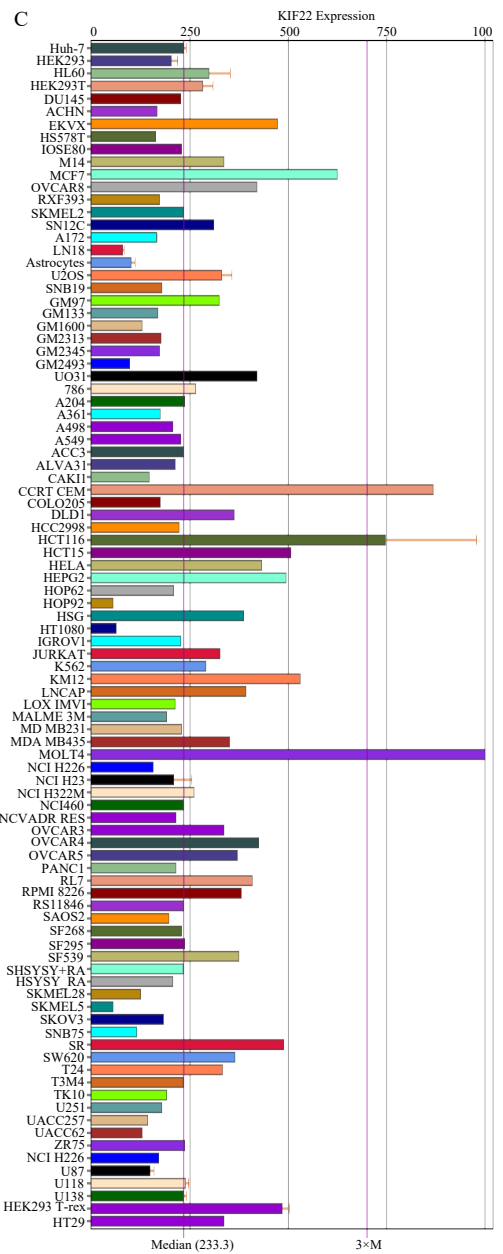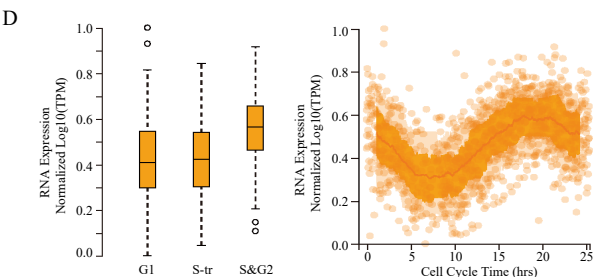

Supplement: f2 [file 9542311.f2.pdf]

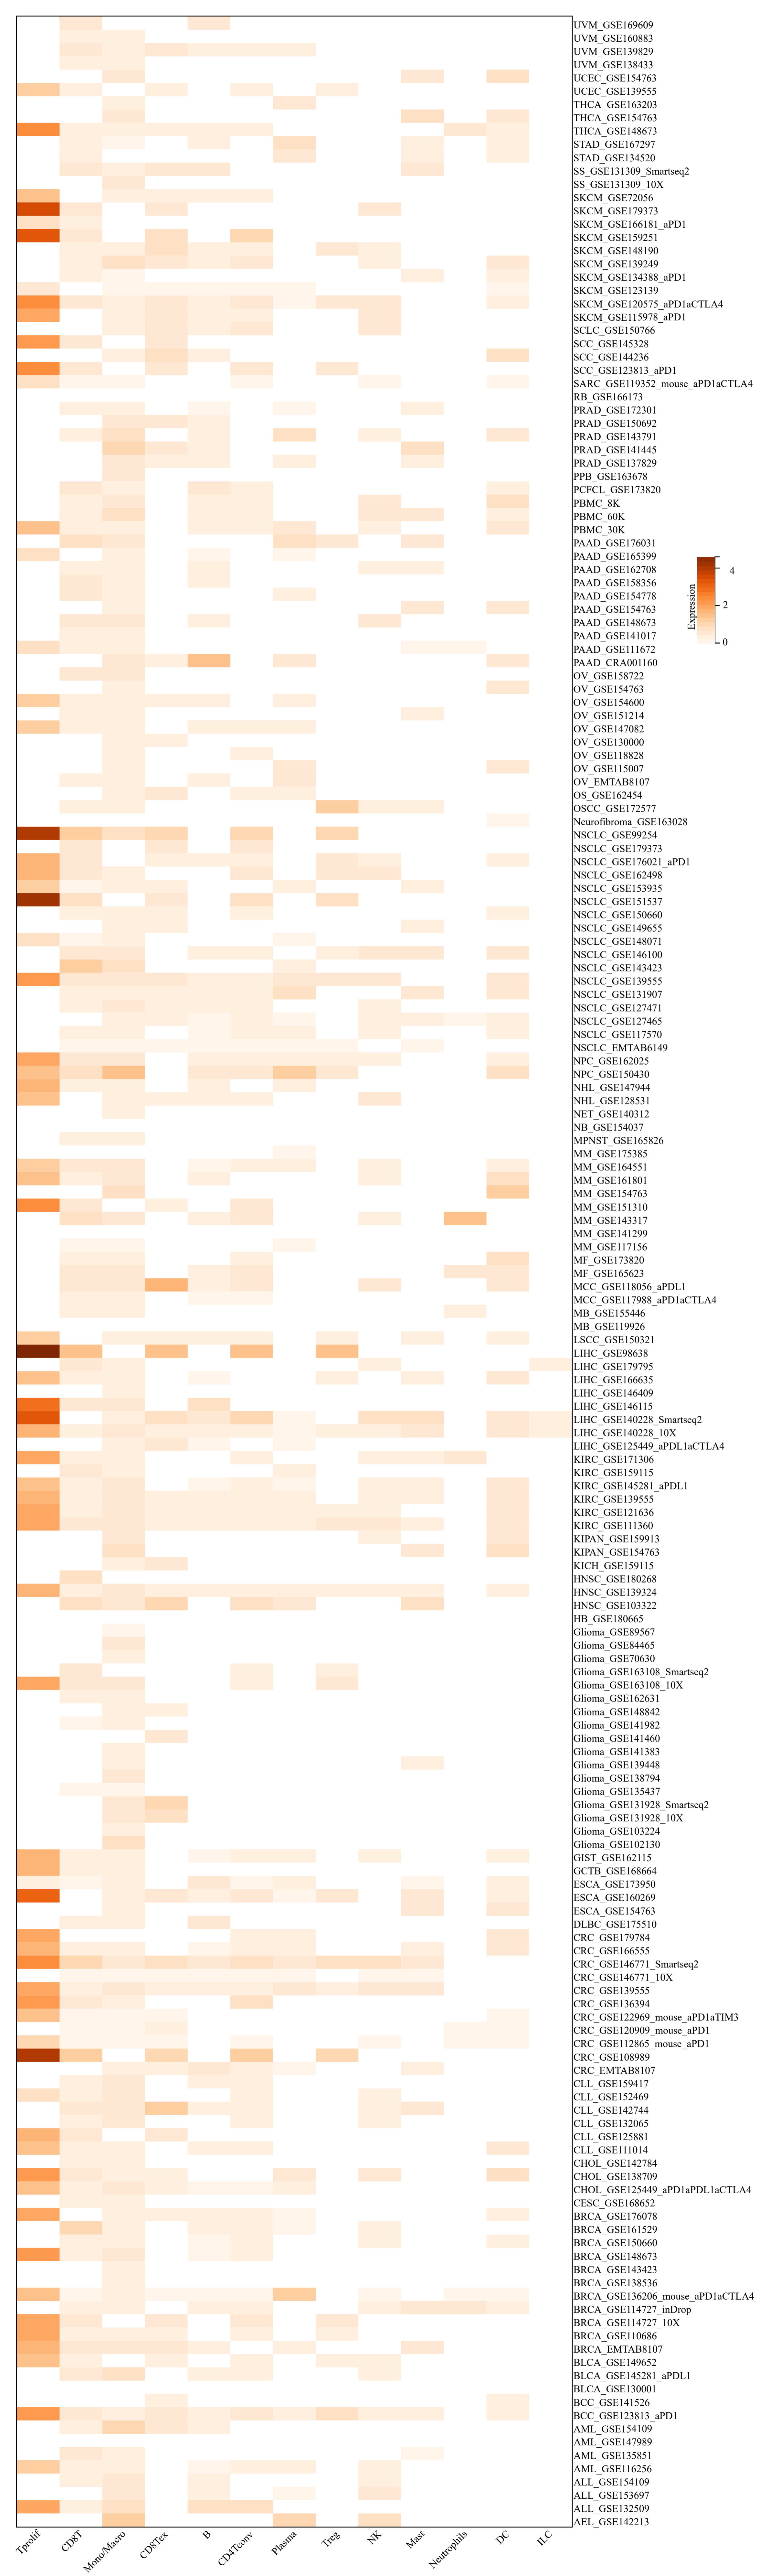

Supplement: f3 [file 9542311.f3.pdf]

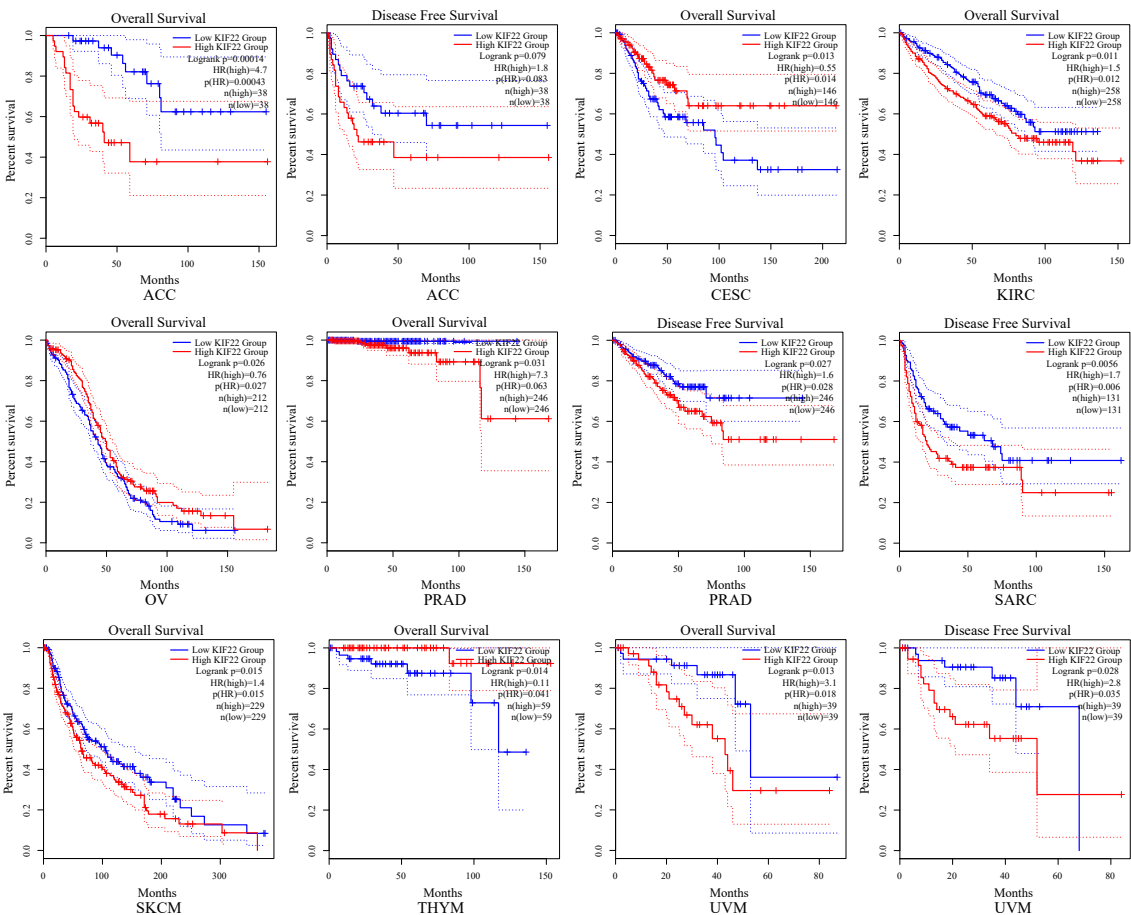

Supplement: f5 [file 9542311.f5.pdf]

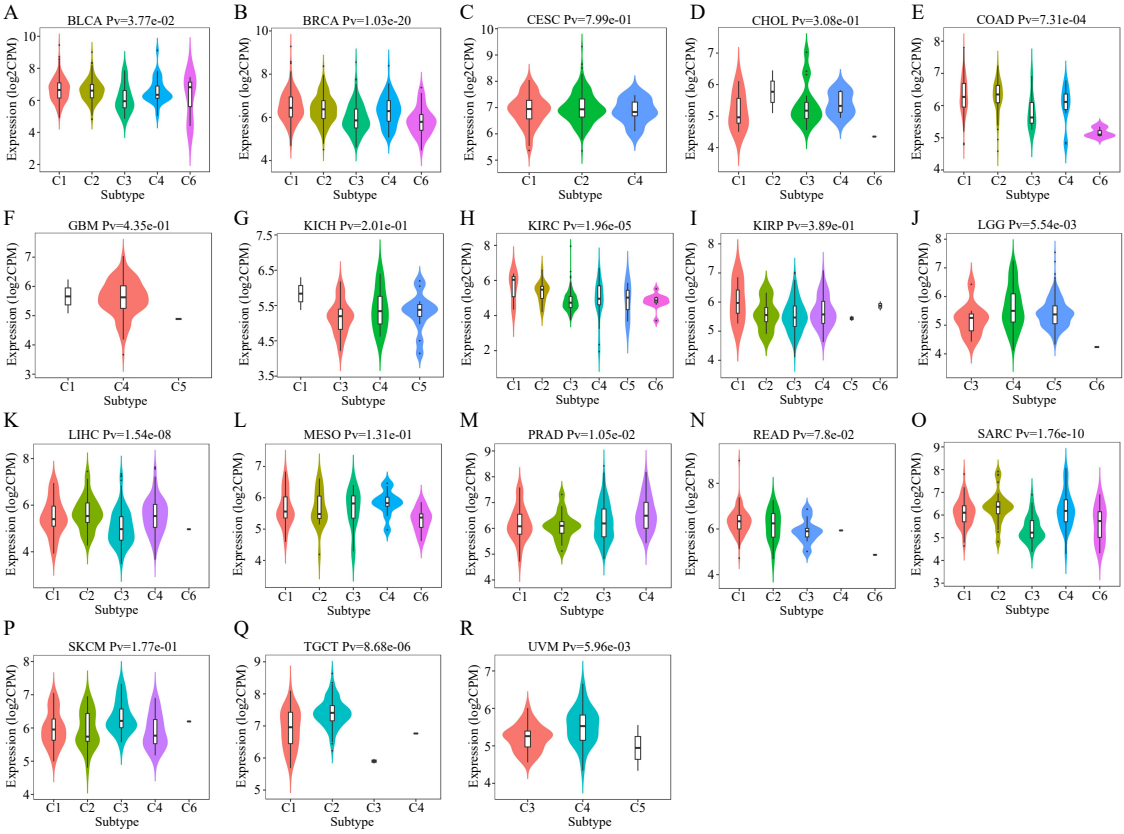

Supplement: f8 [file 9542311.f8.pdf]
